# Supplementary material for: Insights into the Genomic Regions and Candidate Genes of Senescence-Related Traits in Upland Cotton via GWAS
Source: Int J Mol Sci. 2022 Aug 2;23(15):8584. doi: 10.3390/ijms23158584 (PMC9368895; doi:10.3390/ijms23158584)
Supplement: Supplementary file 1 [file ijms-23-08584-s001.zip › Supplementary Figrue S1¿CS8.pdf]

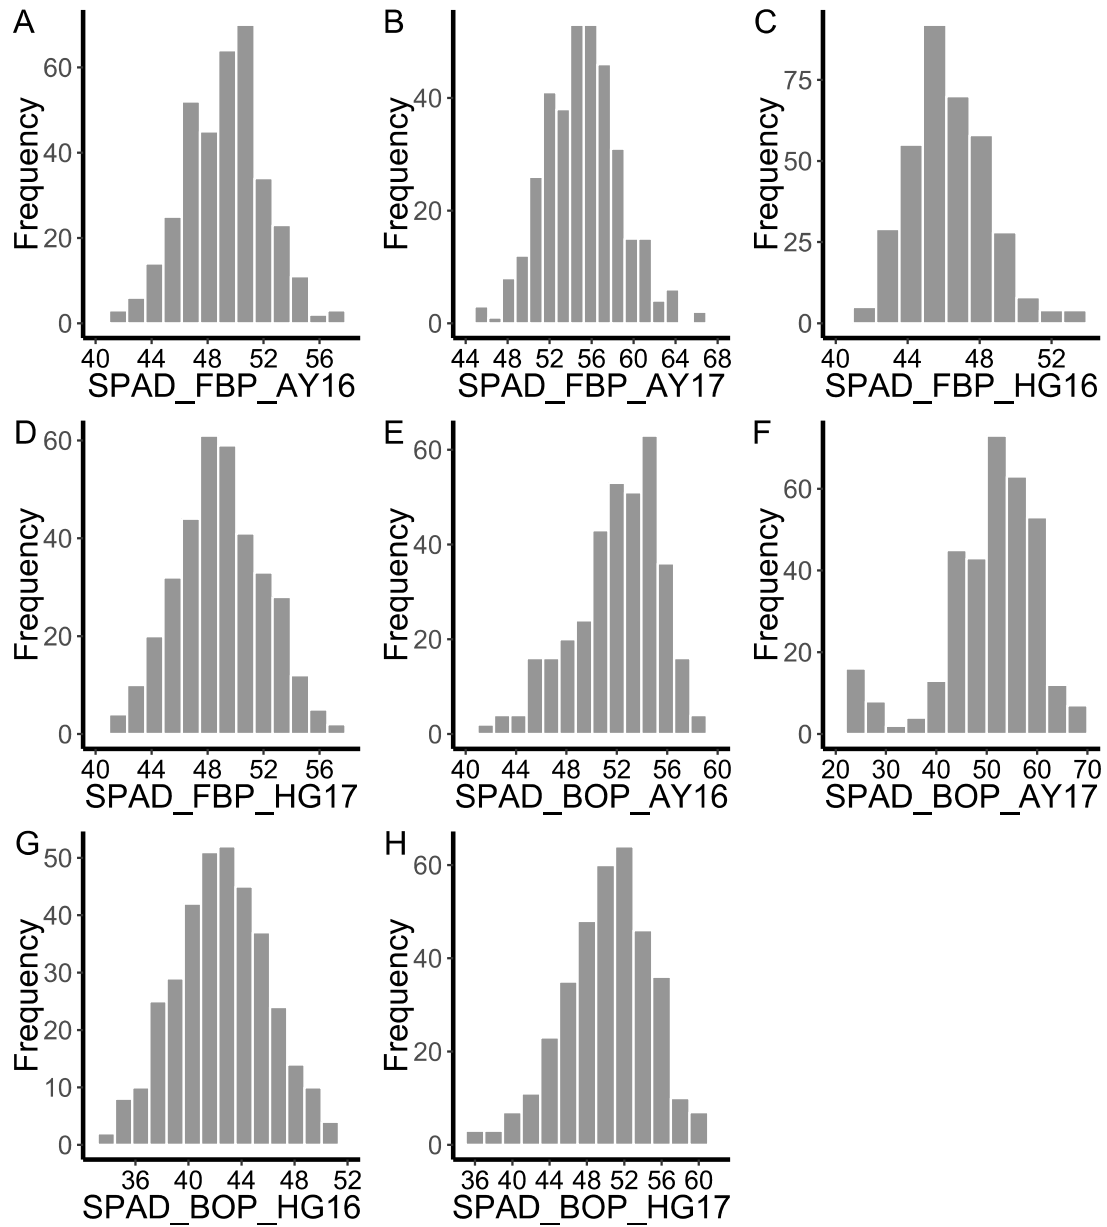

**Figure S1.** Frequency distributions of SAPD in each single environment. FBP: the flowering and boll-setting period; BOP: the boll opening period; AY: Anyang; HG: Huanggang; 16: 2016; 17: 2017.

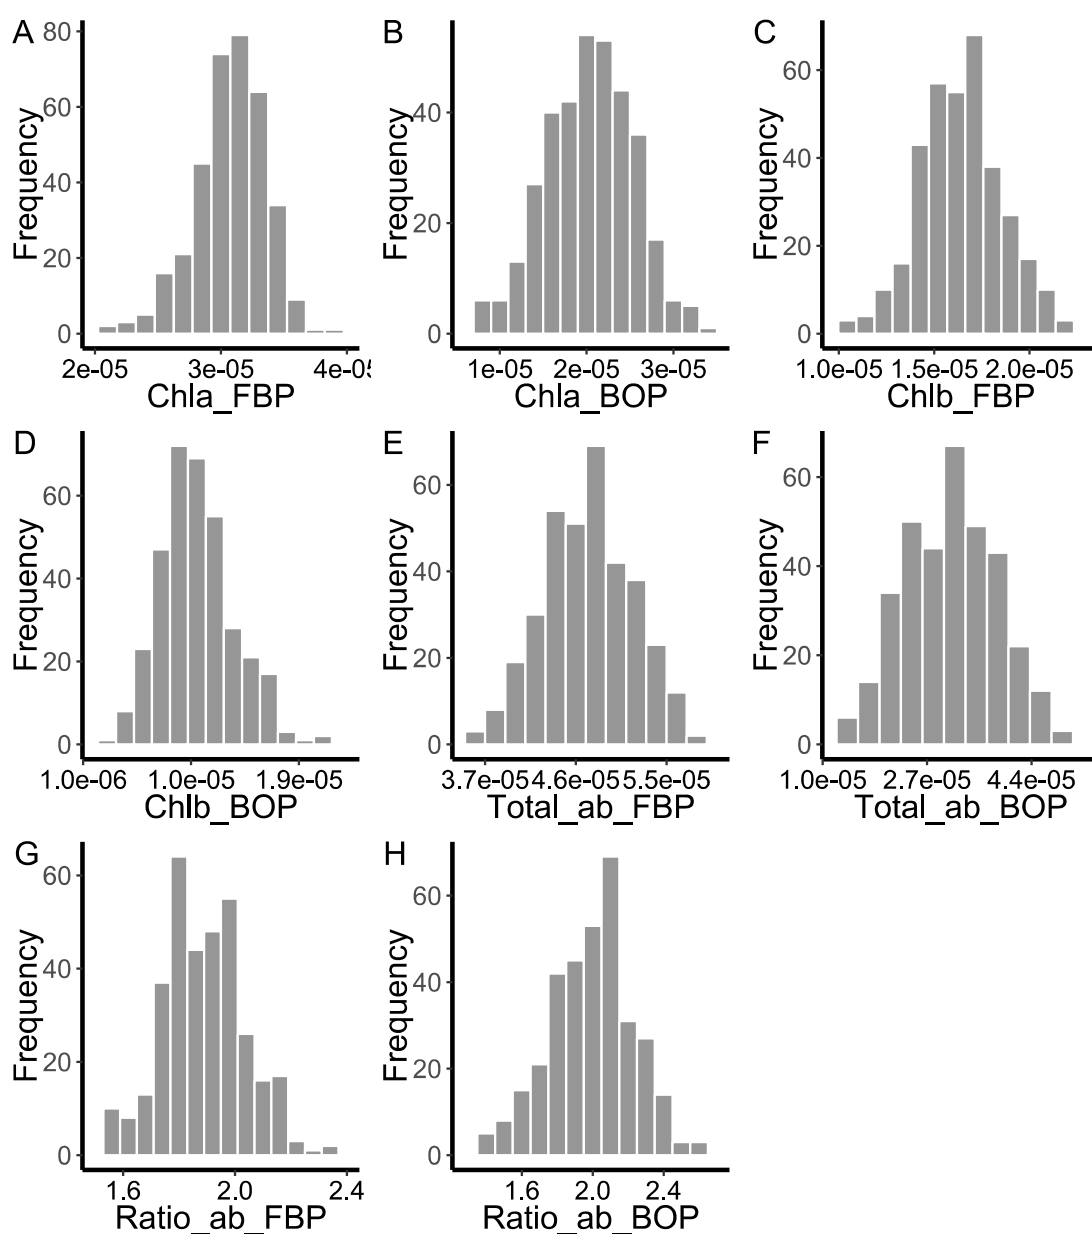

**Figure S2.** Frequency distributions of absolute chlorophyll concentrations at Anyang in 2017. Chla: Chlorophyll a; Chlb: Chlorophyll b; Total\_ab: Total chlorophyll; Ratio\_ab: Chlorophyll a/b; FBP: The flowering and boll-setting period; BOP: the boll opening period.

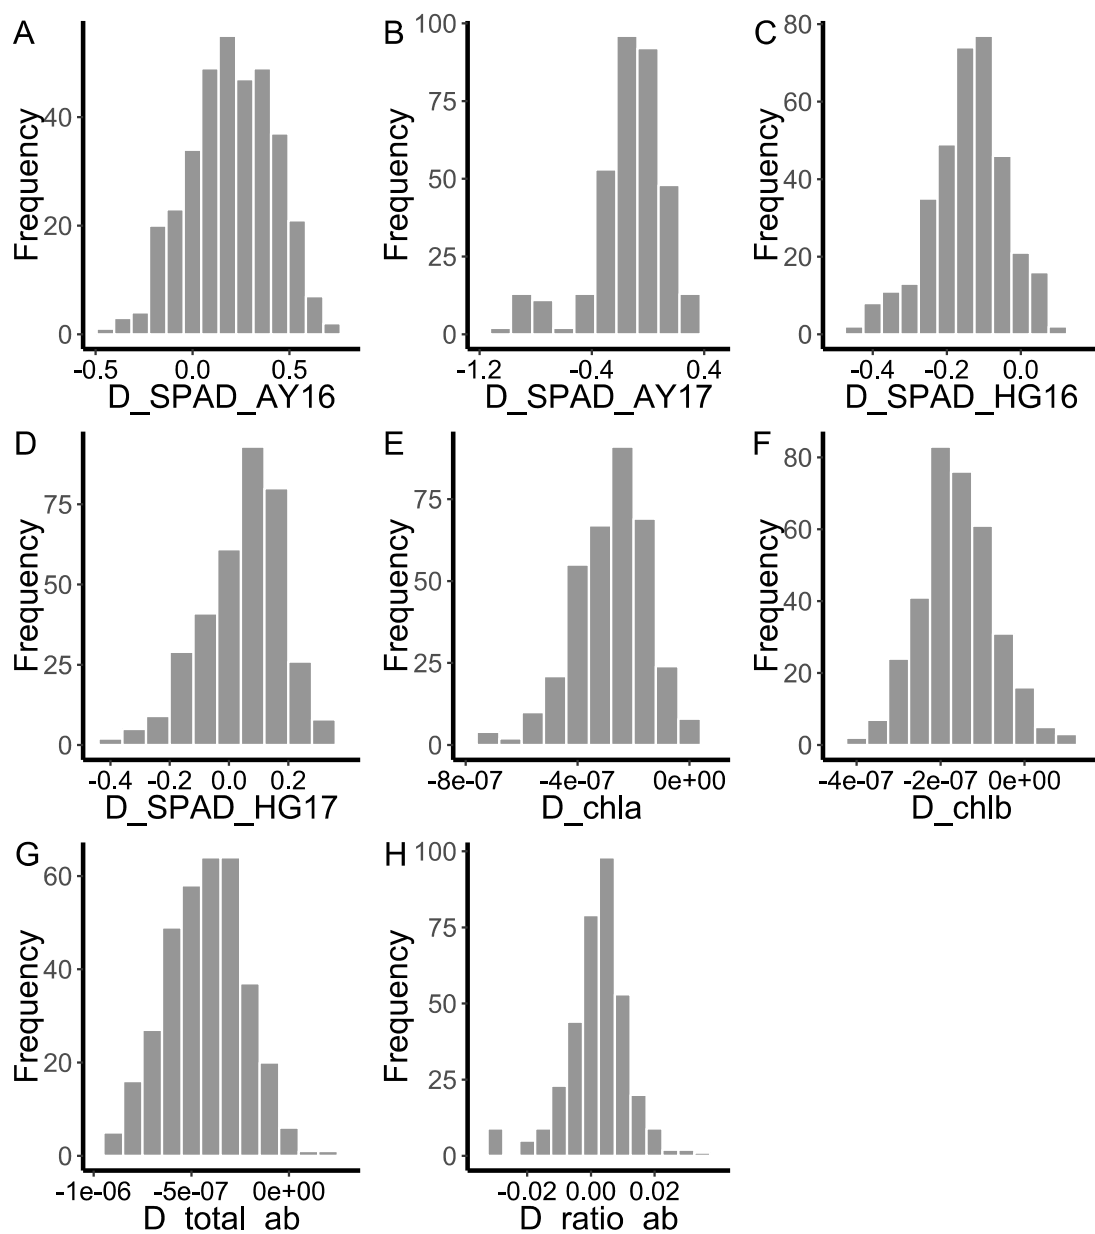

**Figure S3.** Frequency distributions of the diurnal variation of chlorophyll content. D: the diurnal variation; Chla: Chlorophyll a; Chlb: Chlorophyll b; Total\_ab: Total chlorophyll; Ratio\_ab: Chlorophyll a/b; FBP: The flowering and boll-setting period; BOP: the boll opening period; AY: Anyang; HG: Huanggang; 16: 2016; 17: 2017.

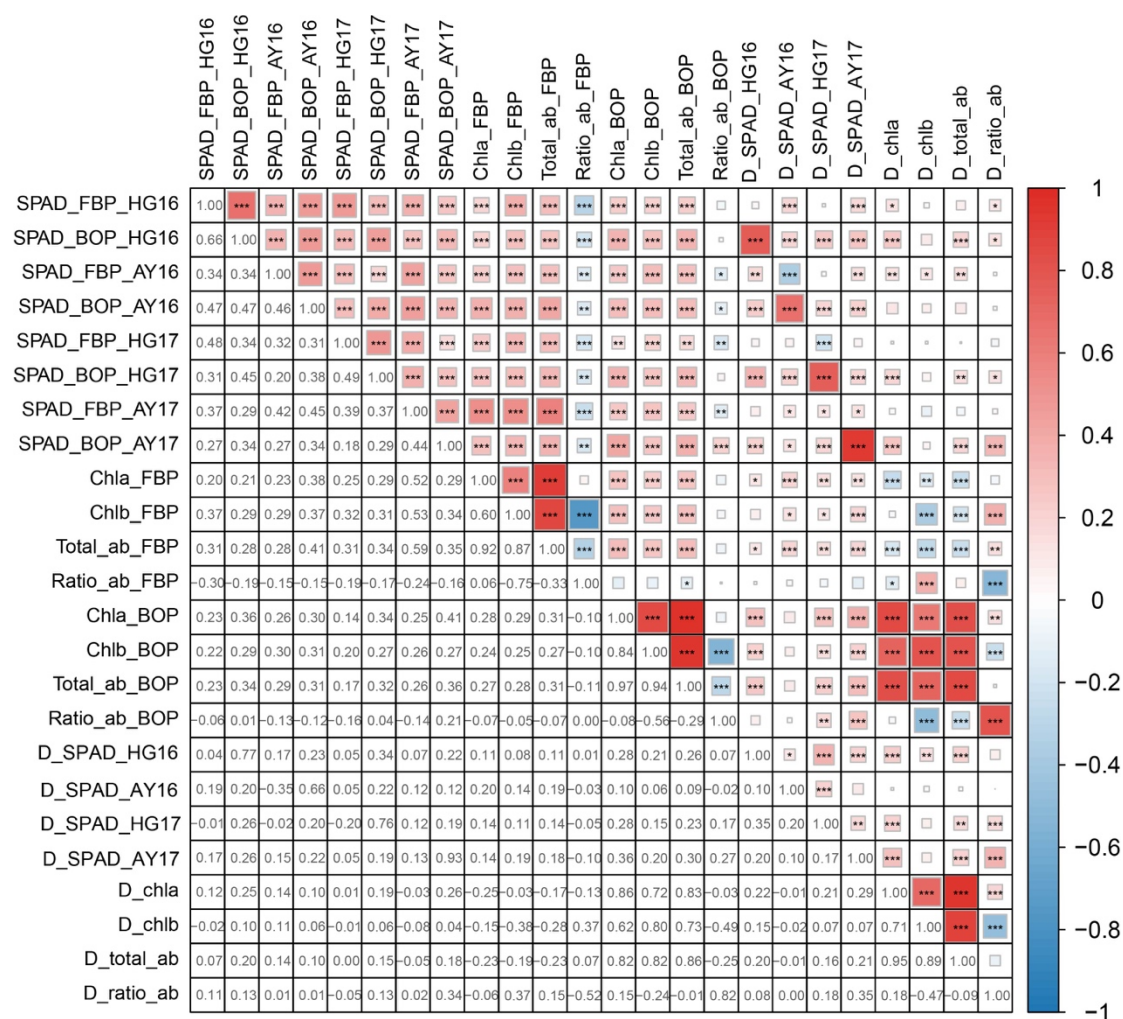

**Figure S4.** Correlation analyses between indices of chlorophyll content in multi-environments. D: the diurnal variation; Chla: Chlorophyll a; Chlb: Chlorophyll b; Total\_ab: Total chlorophyll; Ratio\_ab: Chlorophyll a/b; FBP: The flowering and boll-setting period; BOP: the boll opening period; AY: Anyang; HG: Huanggang; 16: 2016; 17: 2017. Asterisks indicate significance levels (\*\*P < 0.01, \*\*\*P < 0.001, and \*P < 0.05).

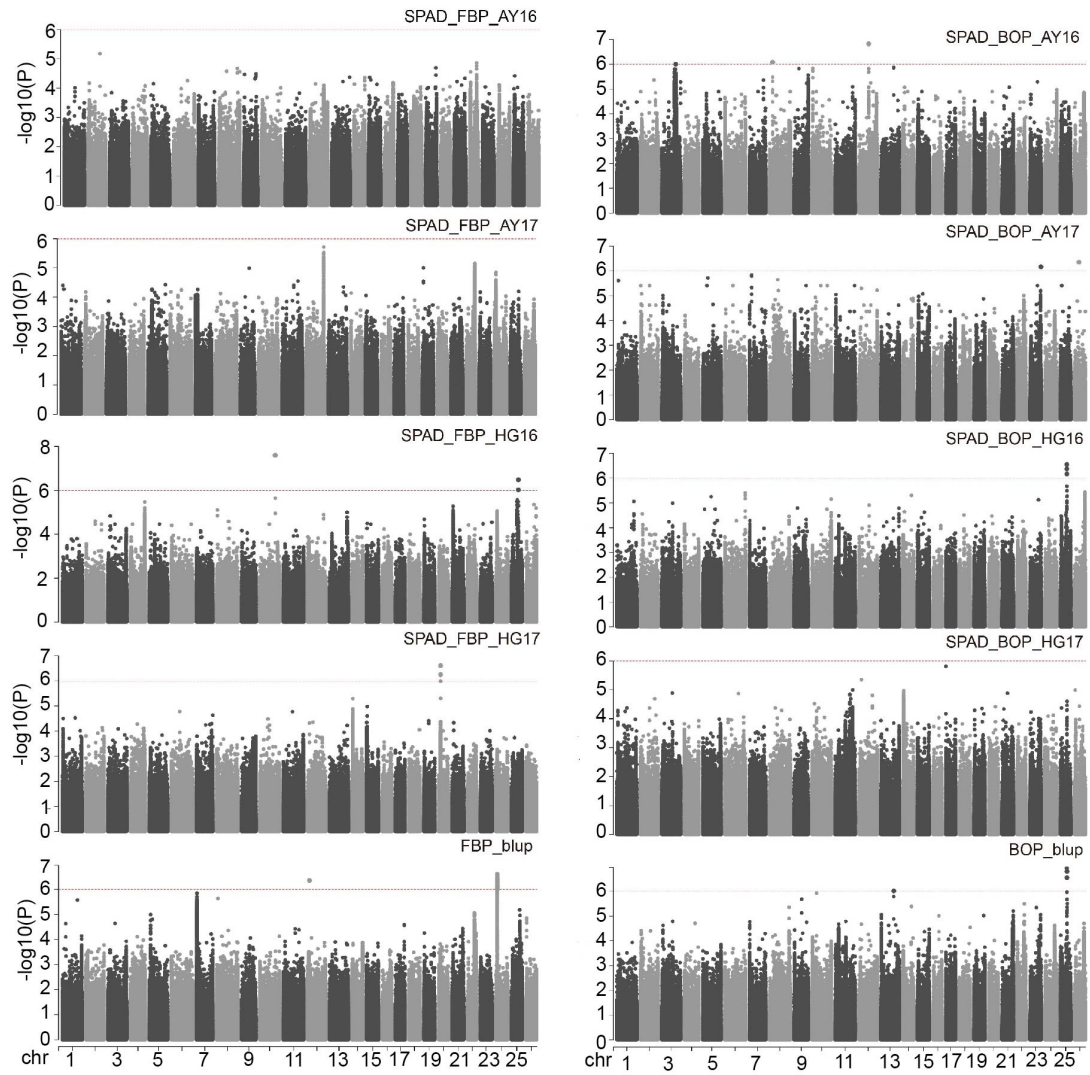

**Figure S5.** Manhattan plots of SPAD in each single environment and BLUP values. FBP: The flowering and boll-setting period; BOP: the boll opening period; blup: Best linear unbiased predictions; AY: Anyang; HG: Huanggang; 16: 2016; 17: 2017.

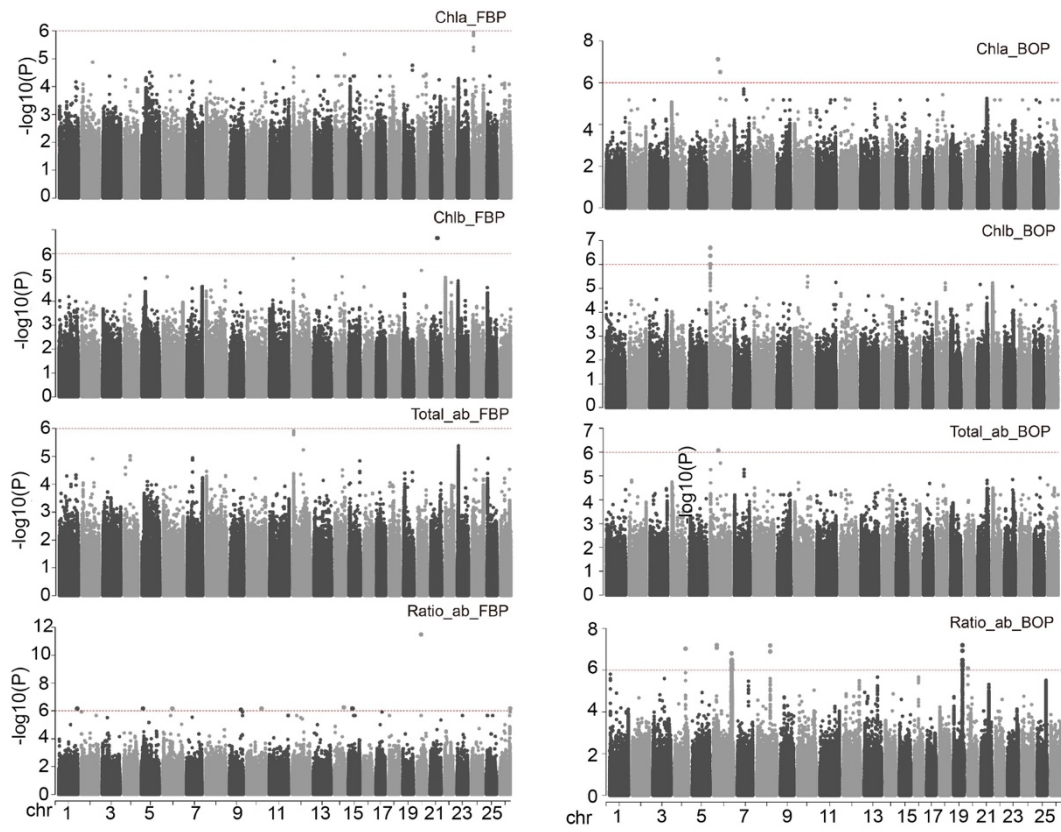

**Figure S6.** Manhattan plots of absolute chlorophyll concentrations at Anyang in 2017. D: the diurnal variation;  
Chla: Chlorophyll a; Chlb: Chlorophyll b; Total\_ab: Total chlorophyll; Ratio\_ab: Chlorophyll a/b; FBP: The  
flowering and boll-setting period; BOP: the boll opening period;

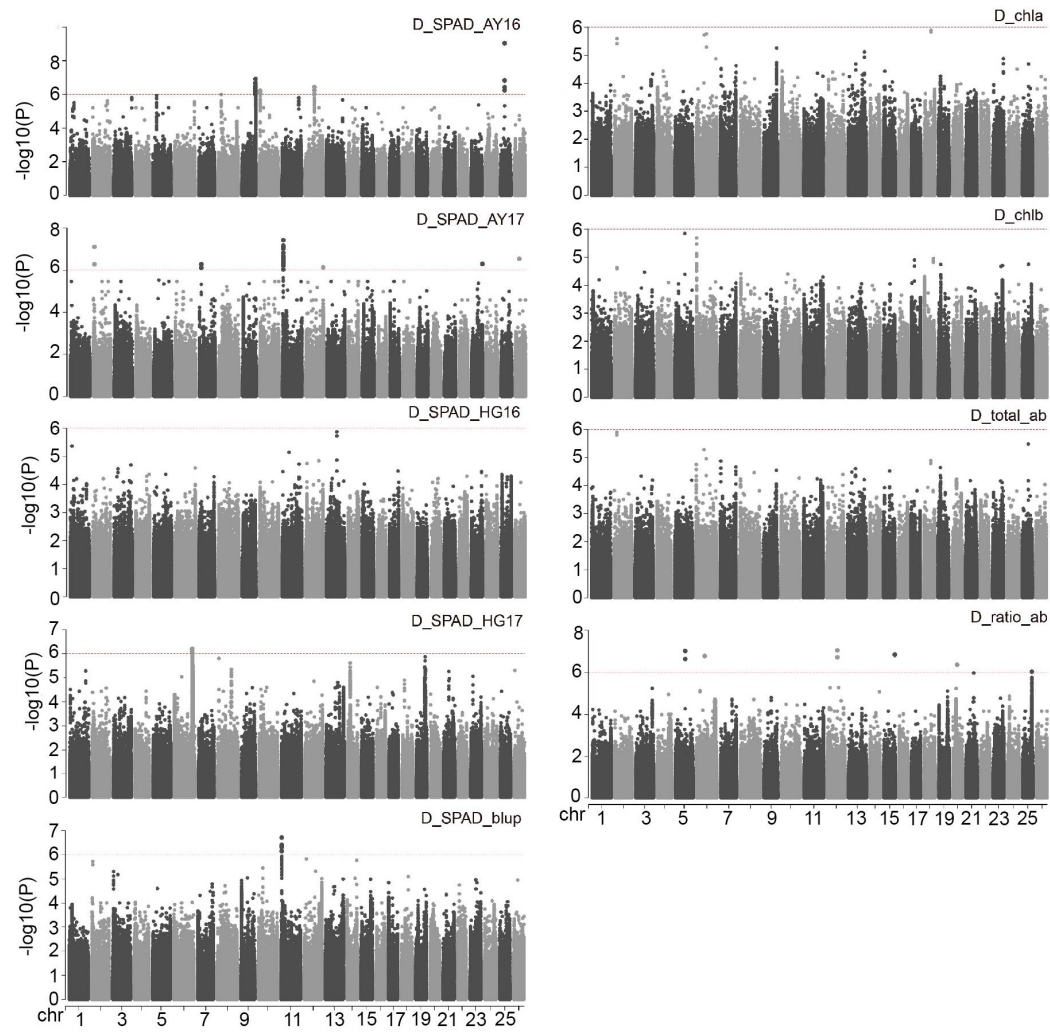

**Figure S7.** Manhattan plots of the diurnal variation of chlorophyll content. D: the diurnal variation; Chla: Chlorophyll a; Chlb: Chlorophyll b; Total\_ab: Total chlorophyll; Ratio\_ab: Chlorophyll a/b; blup: Best linear unbiased predictions; FBP: The flowering and boll-setting period; BOP: the boll opening period; AY: Anyang; HG: Huanggang; 16: 2016; 17: 2017.

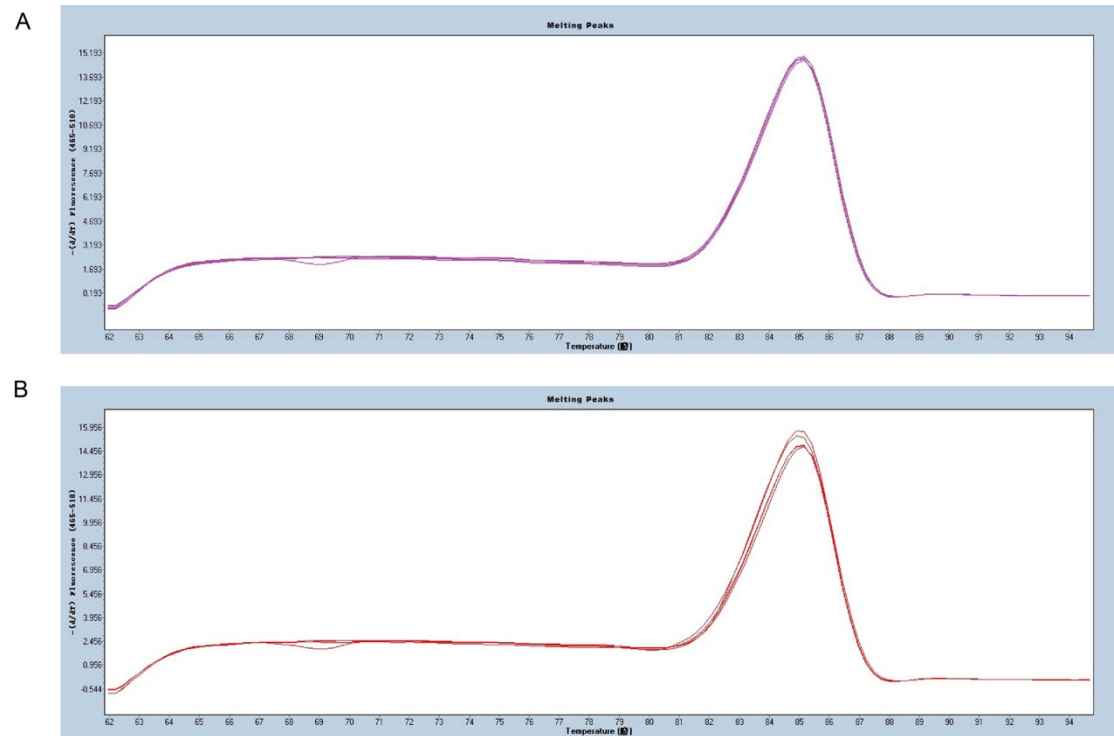

**Figure S8.** Melting curve analysis from qRT-PCR of *GhMCK9* gene. (A) and (B) represented the melting curves for cotton plants and transgenic *Arabidopsis* plants (OE7 and OE14), respectively. The single peak indicated the specific amplification.
