# Supplementary material for: Insights into the Genomic Regions and Candidate Genes of Senescence-Related Traits in Upland Cotton via GWAS
Source: Int J Mol Sci. 2022 Aug 2;23(15):8584. doi: 10.3390/ijms23158584 (PMC9368895; doi:10.3390/ijms23158584)
Supplement: Supplementary file 1 [file ijms-23-08584-s001.zip › Supplementary Table S1¿CS7.xlsx]

## Sheet: Table S1
Table S1 Summary statistics of indices of chlorophyll content and heritability.
Var	Mean	SD	Median	Min	Max	Range	Skew	Kurtosis
SPAD_FBP_AY16	49.1219	2.92771	49.2667	39.8722	56.8667	16.9944	-0.192686	0.131431
SPAD_FBP_AY17	55.1011	3.65818	54.9667	43.8754	66.3695	22.494	0.0702856	0.208679
SPAD_FBP_HG16	46.266	2.25548	46.0222	39.4333	55.3072	15.8738	0.504174	0.872661
SPAD_FBP_HG17	48.8636	3.19303	48.9	40.0667	57.1333	17.0667	-0.07213	-0.17444
SPAD_BOP_AY16	52.0121	3.54559	52.45	37.0643	60.0222	22.9579	-0.82026	0.764185
SPAD_BOP_AY17	48.773	12.8391	51.335	0	70.82	70.82	-1.6988	3.47012
SPAD_BOP_HG16	42.5231	3.56329	42.4889	31.7333	54.3	22.5667	0.0124702	-0.0697563
SPAD_BOP_HG17	50.1905	4.77116	50.5467	32.0167	63.68	31.6633	-0.476023	0.619396
Chla_FBP	3.06825e-05	2.8779e-06	3.0948e-05	1.97101e-05	3.91619e-05	1.94518e-05	-0.589747	0.827683
Chlb_FBP	1.64623e-05	2.2895e-06	1.64554e-05	9.9918e-06	2.55135e-05	1.55217e-05	0.298044	0.731248
Ratio_ab_FBP	1.88251	0.196058	1.87553	1.03034	2.74062	1.71027	-0.244603	5.02278
Total_ab_FBP	4.71448e-05	4.6289e-06	4.71609e-05	3.4025e-05	6.34737e-05	2.94487e-05	-0.00764097	0.0464221
Chla_BOP	2.01481e-05	5.423e-06	2.03e-05	0	3.31e-05	3.31e-05	-0.602233	1.18498
Chlb_BOP	1.04655e-05	3.501e-06	1.01683e-05	0	2.51088e-05	2.51088e-05	0.481292	2.05139
Ratio_ab_BOP	1.97039	0.283202	2.01277	1.09133	2.84482	1.75349	-0.55196	1.03925
Total_ab_BOP	3.06436e-05	8.6825e-06	3.0834e-05	0	6.27847e-05	6.27847e-05	-0.166704	1.49901
D_SPAD_AY16	0.191171	0.230639	0.191481	-0.743574	0.727037	1.47061	-0.432762	0.421376
D_SPAD_HG16	-0.143998	0.102798	-0.138034	-0.475427	0.0948718	0.570299	-0.440594	0.244808
D_SPAD_AY17	-0.189752	0.353557	-0.113725	-1.68249	0.342696	2.02519	-1.95976	4.56796
D_SPAD_HG17	0.0428009	0.137241	0.0667742	-0.453763	0.356774	0.810538	-0.629116	0.474204
D__chla	-2.772e-07	1.417e-07	-2.61e-07	-8.444e-07	2.337e-07	1.078e-06	-0.454202	1.13952
D__chlb	-1.576e-07	9.76e-08	-1.631e-07	-4.804e-07	2.439e-07	7.243e-07	0.438324	1.54107
D_ratio_ab	0.00186694	0.00988832	0.00267962	-0.0312926	0.0334631	0.0647557	-0.727246	2.12952
D_total_ab	-4.342e-07	2.236e-07	-4.184e-07	-1.3287e-06	4.22e-07	1.7507e-06	-0.183509	1.20921

## Sheet: Table S2
Table S2 Variance analysis for SPAD in the natural population.
Periods	Variables	Df	Sum of squares	F value	P value	H2
FBP	Genotype	354	17906	4.812	< 2e-16	0.65
	Environment	3	33662	1067.46	< 2e-16
	Genotype × environment	1062	16282	1.459	5.47e-14
	Residuals	2439	25638
BOP	Genotype	354	65878	5.418	<2e-16	0.41
	Environment	3	52540	509.894	<2e-16
	Genotype × environment	1062	101830	2.792	<2e-16
	Residuals	2420	83120

## Sheet: Table S3
Table S3 List of significant SNPs associated with cotton senescnece.
SNP	Chromosome	Position	Pvalue	Trait
A01_115568753	A01	115568753	6.77123e-07	Ratio_ab_FBP
A01_115568769	A01	115568769	6.77123e-07	Ratio_ab_FBP
A01_115568770	A01	115568770	6.77123e-07	Ratio_ab_FBP
A01_115568787	A01	115568787	6.77123e-07	Ratio_ab_FBP
A01_115568797	A01	115568797	6.77123e-07	Ratio_ab_FBP
A01_115568831	A01	115568831	6.77123e-07	Ratio_ab_FBP
A02_15573340	A02	15573340	1.25553e-06	D_total_ab
A02_15573340	A02	15573340	2.58684e-06	D_chla
A02_15573342	A02	15573342	1.57583e-06	D_total_ab
A02_15573342	A02	15573342	3.88109e-06	D_chla
A02_15573343	A02	15573343	1.57583e-06	D_total_ab
A02_15573343	A02	15573343	3.88109e-06	D_chla
A02_6556304	A02	6556304	2.62895e-06	D_SPAD_blup
A02_6556304	A02	6556304	5.24209e-07	D_SPAD_AY17
A02_6556309	A02	6556309	1.90563e-06	D_SPAD_blup
A02_6556309	A02	6556309	7.83143e-08	D_SPAD_AY17
A02_6556309	A02	6556309	8.49253e-06	SPAD_BOP_AY17
A02_82886748	A02	82886748	4.32319e-06	SPAD_BOP_AY16
A02_82886748	A02	82886748	4.85107e-06	D_SPAD_AY16
A03_113682955	A03	113682955	1.52385e-06	D_SPAD_AY16
A03_113682955	A03	113682955	5.16571e-06	SPAD_BOP_AY16
A03_113682983	A03	113682983	2.06773e-06	D_SPAD_AY16
A03_113682983	A03	113682983	9.70414e-06	SPAD_BOP_AY16
A03_6068347	A03	6068347	7.66211e-06	D_SPAD_blup
A03_6068347	A03	6068347	9.83054e-06	SPAD_BOP_AY17
A03_83600807	A03	83600807	9.92591e-07	SPAD_BOP_AY16
A04_69311143	A04	69311143	9.37429e-08	Ratio_ab_BOP
A05_31628900	A05	31628900	1.92468e-06	SPAD_BOP_AY17
A05_31628900	A05	31628900	2.97062e-06	D_SPAD_AY17
A05_31628910	A05	31628910	1.92468e-06	SPAD_BOP_AY17
A05_31628910	A05	31628910	2.97062e-06	D_SPAD_AY17
A05_61940854	A05	61940854	1.43567e-06	D_chlb
A05_61940854	A05	61940854	9.51475e-08	D_ratio_ab
A05_61940864	A05	61940864	2.28402e-07	D_ratio_ab
A05_9695614	A05	9695614	6.77123e-07	Ratio_ab_FBP
A06_112240358	A06	112240358	6.24734e-07	D_SPAD_HG17
A06_112450424	A06	112450424	8.17851e-07	D_SPAD_HG17
A06_112640294	A06	112640294	7.92111e-07	D_SPAD_HG17
A06_113129230	A06	113129230	7.12965e-06	Ratio_ab_BOP
A06_113129230	A06	113129230	7.77561e-06	D_SPAD_HG17
A06_113268162	A06	113268162	9.69515e-07	Ratio_ab_BOP
A06_113346362	A06	113346362	4.97487e-06	D_SPAD_HG17
A06_113346362	A06	113346362	9.49404e-06	Ratio_ab_BOP
A06_113454848	A06	113454848	3.44667e-07	Ratio_ab_BOP
A06_113494606	A06	113494606	3.95454e-07	Ratio_ab_BOP
A06_113494814	A06	113494814	8.79176e-07	Ratio_ab_BOP
A06_113505846	A06	113505846	9.10796e-07	Ratio_ab_BOP
A06_113640333	A06	113640333	2.85641e-06	Ratio_ab_BOP
A06_113640333	A06	113640333	6.82062e-06	D_SPAD_HG17
A06_113666777	A06	113666777	3.39719e-07	Ratio_ab_BOP
A06_113722957	A06	113722957	8.75925e-06	D_SPAD_HG17
A06_113722957	A06	113722957	9.50004e-06	Ratio_ab_BOP
A06_113722968	A06	113722968	8.75925e-06	D_SPAD_HG17
A06_113722968	A06	113722968	9.50004e-06	Ratio_ab_BOP
A06_113901591	A06	113901591	5.72006e-06	D_SPAD_HG17
A06_113901591	A06	113901591	8.38555e-07	Ratio_ab_BOP
A06_114047873	A06	114047873	9.83531e-07	Ratio_ab_BOP
A06_114112128	A06	114112128	4.65147e-07	Ratio_ab_BOP
A06_114112257	A06	114112257	9.89873e-07	Ratio_ab_BOP
A06_114263001	A06	114263001	1.31038e-06	Ratio_ab_BOP
A06_114263001	A06	114263001	3.60276e-06	D_SPAD_HG17
A06_1144426	A06	1144426	1.40353e-06	Chlb_BOP
A06_1144426	A06	1144426	9.00699e-06	D_chlb
A06_1144572	A06	1144572	1.40353e-06	Chlb_BOP
A06_1144572	A06	1144572	9.00699e-06	D_chlb
A06_1144745	A06	1144745	1.40353e-06	Chlb_BOP
A06_1144745	A06	1144745	9.00699e-06	D_chlb
A06_1144810	A06	1144810	1.40353e-06	Chlb_BOP
A06_1144810	A06	1144810	9.00699e-06	D_chlb
A06_1144860	A06	1144860	3.31576e-06	Chlb_BOP
A06_1144860	A06	1144860	9.25122e-06	D_chlb
A06_114539476	A06	114539476	4.34577e-06	D_SPAD_HG17
A06_114539476	A06	114539476	8.78294e-06	Ratio_ab_BOP
A06_114544799	A06	114544799	1.57188e-07	Ratio_ab_BOP
A06_114663819	A06	114663819	7.87417e-06	Ratio_ab_BOP
A06_114663819	A06	114663819	9.53175e-06	D_SPAD_HG17
A06_1147011	A06	1147011	1.98266e-07	Chlb_BOP
A06_1147011	A06	1147011	2.08741e-06	D_chlb
A06_1148166	A06	1148166	1.0484e-06	Chlb_BOP
A06_1148166	A06	1148166	8.61657e-06	D_chlb
A06_114946705	A06	114946705	7.12871e-07	Ratio_ab_BOP
A06_115022276	A06	115022276	9.61338e-07	Ratio_ab_BOP
A06_1150692	A06	1150692	7.58316e-06	D_chlb
A06_1150692	A06	1150692	9.66314e-07	Chlb_BOP
A06_115105423	A06	115105423	9.15579e-07	Ratio_ab_BOP
A06_1151516	A06	1151516	1.17178e-06	Chlb_BOP
A06_1151516	A06	1151516	3.45749e-06	D_chlb
A06_115188546	A06	115188546	7.6313e-07	Ratio_ab_BOP
A06_115360476	A06	115360476	6.10256e-07	Ratio_ab_BOP
A06_115360484	A06	115360484	6.10256e-07	Ratio_ab_BOP
A06_115653295	A06	115653295	9.53375e-07	Ratio_ab_BOP
A06_115708816	A06	115708816	4.82109e-06	Ratio_ab_BOP
A06_115708816	A06	115708816	8.9933e-06	D_SPAD_HG17
A06_115816851	A06	115816851	6.90644e-07	Ratio_ab_BOP
A06_115816853	A06	115816853	6.90644e-07	Ratio_ab_BOP
A06_115896630	A06	115896630	6.27765e-07	Ratio_ab_BOP
A06_116013093	A06	116013093	7.93583e-07	Ratio_ab_BOP
A06_116022052	A06	116022052	6.49214e-06	Ratio_ab_BOP
A06_116022052	A06	116022052	8.96068e-06	D_SPAD_HG17
A06_116028235	A06	116028235	3.21439e-07	Ratio_ab_BOP
A06_116040111	A06	116040111	9.27813e-07	Ratio_ab_BOP
A06_116412756	A06	116412756	3.93623e-06	Ratio_ab_BOP
A06_116412756	A06	116412756	7.03308e-06	D_SPAD_HG17
A06_116547373	A06	116547373	3.53789e-07	Ratio_ab_BOP
A06_116561417	A06	116561417	9.90889e-07	Ratio_ab_BOP
A06_116581020	A06	116581020	5.34352e-06	Ratio_ab_BOP
A06_116581020	A06	116581020	7.679e-06	D_SPAD_HG17
A06_116581063	A06	116581063	4.31468e-06	Ratio_ab_BOP
A06_116581063	A06	116581063	7.17775e-06	D_SPAD_HG17
A06_116606208	A06	116606208	4.83637e-07	Ratio_ab_BOP
A06_116698610	A06	116698610	5.51057e-07	Ratio_ab_BOP
A06_116965609	A06	116965609	6.84285e-06	D_SPAD_HG17
A06_116965609	A06	116965609	8.15236e-06	Ratio_ab_BOP
A06_116967576	A06	116967576	6.01803e-06	Ratio_ab_BOP
A06_116967576	A06	116967576	7.25893e-06	D_SPAD_HG17
A06_117222958	A06	117222958	9.6566e-07	Ratio_ab_BOP
A06_117262228	A06	117262228	3.0739e-06	Ratio_ab_BOP
A06_117262228	A06	117262228	8.2197e-06	D_SPAD_HG17
A06_117275789	A06	117275789	5.73846e-06	D_SPAD_HG17
A06_117275789	A06	117275789	8.43409e-06	Ratio_ab_BOP
A06_117341296	A06	117341296	7.70903e-07	Ratio_ab_BOP
A06_117720315	A06	117720315	9.24042e-07	Ratio_ab_BOP
A06_1181361	A06	1181361	4.30317e-07	Chlb_BOP
A06_1181361	A06	1181361	5.47918e-06	Total_ab_BOP
A06_1181361	A06	1181361	9.44176e-06	D_chlb
A06_20909375	A06	20909375	6.29316e-08	Ratio_ab_BOP
A06_20909375	A06	20909375	7.30148e-06	D_ratio_ab
A06_20909391	A06	20909391	8.13958e-06	D_ratio_ab
A06_20909391	A06	20909391	8.49685e-08	Ratio_ab_BOP
A06_49941259	A06	49941259	1.6406e-07	D_ratio_ab
A06_49941259	A06	49941259	1.90673e-06	D_chla
A06_49941259	A06	49941259	5.2964e-06	D_total_ab
A06_49941259	A06	49941259	7.49974e-08	Chla_BOP
A06_49941259	A06	49941259	8.59155e-07	Total_ab_BOP
A06_61589748	A06	61589748	6.77123e-07	Ratio_ab_FBP
A06_63390768	A06	63390768	5.18853e-06	D_chla
A06_63390768	A06	63390768	5.81228e-06	Chla_BOP
A06_63390795	A06	63390795	1.74301e-06	D_chla
A06_63390795	A06	63390795	2.91231e-06	Total_ab_BOP
A06_63390795	A06	63390795	3.07037e-07	Chla_BOP
A07_12602268	A07	12602268	4.66725e-06	SPAD_BOP_AY17
A07_12602268	A07	12602268	5.22815e-07	D_SPAD_AY17
A07_12602271	A07	12602271	7.75751e-07	D_SPAD_AY17
A07_12602271	A07	12602271	8.80068e-06	SPAD_BOP_AY17
A07_61313633	A07	61313633	2.01195e-06	Chla_BOP
A07_61313633	A07	61313633	5.35133e-06	Total_ab_BOP
A07_61313636	A07	61313636	2.66538e-06	Chla_BOP
A07_61313636	A07	61313636	7.62157e-06	Total_ab_BOP
A08_18726631	A08	18726631	1.00761e-06	D_SPAD_AY16
A08_18726631	A08	18726631	4.89227e-06	SPAD_BOP_AY16
A08_18726639	A08	18726639	1.00761e-06	D_SPAD_AY16
A08_18726639	A08	18726639	4.89227e-06	SPAD_BOP_AY16
A08_18726651	A08	18726651	1.00761e-06	D_SPAD_AY16
A08_18726651	A08	18726651	4.89227e-06	SPAD_BOP_AY16
A08_18726653	A08	18726653	1.00761e-06	D_SPAD_AY16
A08_18726653	A08	18726653	4.89227e-06	SPAD_BOP_AY16
A08_18726904	A08	18726904	3.33051e-06	SPAD_BOP_AY16
A08_18726904	A08	18726904	5.13069e-06	D_SPAD_AY16
A08_18726934	A08	18726934	3.33051e-06	SPAD_BOP_AY16
A08_18726934	A08	18726934	5.13069e-06	D_SPAD_AY16
A08_18726952	A08	18726952	4.00948e-06	D_SPAD_AY16
A08_18726952	A08	18726952	8.33232e-07	SPAD_BOP_AY16
A08_18726956	A08	18726956	4.00948e-06	D_SPAD_AY16
A08_18726956	A08	18726956	8.33232e-07	SPAD_BOP_AY16
A08_49723514	A08	49723514	2.28532e-06	SPAD_BOP_AY17
A08_49723514	A08	49723514	6.00812e-06	D_SPAD_AY17
A08_53336637	A08	53336637	6.21359e-06	SPAD_BOP_AY17
A08_53336637	A08	53336637	9.12689e-06	D_SPAD_AY17
A08_85414623	A08	85414623	1.27607e-07	Ratio_ab_BOP
A08_85414625	A08	85414625	1.27607e-07	Ratio_ab_BOP
A08_85414663	A08	85414663	6.5847e-08	Ratio_ab_BOP
A08_85414708	A08	85414708	8.88696e-06	D_SPAD_HG17
A08_85414708	A08	85414708	9.91185e-06	Ratio_ab_BOP
A08_85414713	A08	85414713	8.88696e-06	D_SPAD_HG17
A08_85414713	A08	85414713	9.91185e-06	Ratio_ab_BOP
A09_40190642	A09	40190642	4.35618e-06	D_SPAD_AY17
A09_40190642	A09	40190642	9.16312e-06	D_SPAD_blup
A09_71543578	A09	71543578	8.1296e-07	Ratio_ab_FBP
A09_84042802	A09	84042802	3.94893e-07	D_SPAD_AY16
A09_84042876	A09	84042876	3.82847e-07	D_SPAD_AY16
A09_84052219	A09	84052219	6.64586e-07	D_SPAD_AY16
A09_84056246	A09	84056246	6.57674e-07	D_SPAD_AY16
A09_84056881	A09	84056881	9.9802e-07	D_SPAD_AY16
A09_84057233	A09	84057233	1.20342e-07	D_SPAD_AY16
A09_84057233	A09	84057233	6.63791e-06	SPAD_BOP_AY16
A09_84058743	A09	84058743	9.25842e-07	D_SPAD_AY16
A09_84060108	A09	84060108	4.74549e-07	D_SPAD_AY16
A09_84060745	A09	84060745	8.44646e-07	D_SPAD_AY16
A09_84060890	A09	84060890	7.34527e-07	D_SPAD_AY16
A09_84061248	A09	84061248	5.04701e-07	D_SPAD_AY16
A09_84061512	A09	84061512	5.46965e-07	D_SPAD_AY16
A09_84075523	A09	84075523	8.06833e-07	D_SPAD_AY16
A09_84077031	A09	84077031	3.18137e-07	D_SPAD_AY16
A09_84077390	A09	84077390	2.22593e-07	D_SPAD_AY16
A09_84077535	A09	84077535	3.8908e-07	D_SPAD_AY16
A09_84077572	A09	84077572	4.79882e-07	D_SPAD_AY16
A09_84077658	A09	84077658	6.25141e-07	D_SPAD_AY16
A09_84077875	A09	84077875	2.02475e-07	D_SPAD_AY16
A09_84083563	A09	84083563	5.53254e-07	D_SPAD_AY16
A09_84088236	A09	84088236	3.25053e-07	D_SPAD_AY16
A09_84088236	A09	84088236	9.07997e-06	SPAD_BOP_AY16
A09_84094386	A09	84094386	4.78908e-07	D_SPAD_AY16
A09_84096198	A09	84096198	7.74011e-07	D_SPAD_AY16
A09_84121325	A09	84121325	7.44676e-07	D_SPAD_AY16
A09_84211413	A09	84211413	7.74011e-07	D_SPAD_AY16
A09_84280739	A09	84280739	3.49953e-07	D_SPAD_AY16
A09_84412162	A09	84412162	3.0692e-06	D_SPAD_AY16
A09_84412162	A09	84412162	8.99665e-06	SPAD_BOP_AY16
A09_84416622	A09	84416622	1.26408e-06	D_SPAD_AY16
A09_84416622	A09	84416622	5.93909e-06	SPAD_BOP_AY16
A09_84416627	A09	84416627	1.26408e-06	D_SPAD_AY16
A09_84416627	A09	84416627	5.93909e-06	SPAD_BOP_AY16
A09_84427281	A09	84427281	3.31601e-06	D_SPAD_AY16
A09_84427281	A09	84427281	5.89432e-06	SPAD_BOP_AY16
A09_84438617	A09	84438617	2.09298e-06	D_SPAD_AY16
A09_84438617	A09	84438617	9.91778e-06	SPAD_BOP_AY16
A09_84449147	A09	84449147	2.54189e-06	D_SPAD_AY16
A09_84449147	A09	84449147	4.68974e-06	SPAD_BOP_AY16
A09_84449198	A09	84449198	3.90549e-06	D_SPAD_AY16
A09_84449198	A09	84449198	7.88023e-06	SPAD_BOP_AY16
A09_84449238	A09	84449238	2.84857e-06	D_SPAD_AY16
A09_84449238	A09	84449238	4.34131e-06	SPAD_BOP_AY16
A09_84449573	A09	84449573	2.60868e-06	D_SPAD_AY16
A09_84449573	A09	84449573	3.70634e-06	SPAD_BOP_AY16
A09_84449671	A09	84449671	2.57962e-06	D_SPAD_AY16
A09_84449671	A09	84449671	4.61275e-06	SPAD_BOP_AY16
A09_84449689	A09	84449689	3.52677e-06	D_SPAD_AY16
A09_84449689	A09	84449689	9.59801e-06	SPAD_BOP_AY16
A09_84450693	A09	84450693	2.70208e-06	D_SPAD_AY16
A09_84450693	A09	84450693	6.96224e-06	SPAD_BOP_AY16
A09_84457184	A09	84457184	4.53858e-06	D_SPAD_AY16
A09_84457184	A09	84457184	8.36702e-06	SPAD_BOP_AY16
A09_84461288	A09	84461288	3.15369e-06	D_SPAD_AY16
A09_84461288	A09	84461288	7.13486e-06	SPAD_BOP_AY16
A09_84461295	A09	84461295	3.15369e-06	D_SPAD_AY16
A09_84461295	A09	84461295	7.13486e-06	SPAD_BOP_AY16
A09_84465167	A09	84465167	1.38635e-06	D_SPAD_AY16
A09_84465167	A09	84465167	9.18426e-06	SPAD_BOP_AY16
A09_84469798	A09	84469798	2.1846e-06	D_SPAD_AY16
A09_84469798	A09	84469798	9.93483e-06	SPAD_BOP_AY16
A09_84473424	A09	84473424	2.39921e-06	D_SPAD_AY16
A09_84473424	A09	84473424	9.3443e-06	SPAD_BOP_AY16
A09_84501173	A09	84501173	1.47469e-06	D_SPAD_AY16
A09_84501173	A09	84501173	9.96287e-06	SPAD_BOP_AY16
A09_84506290	A09	84506290	1.56e-06	D_SPAD_AY16
A09_84506290	A09	84506290	9.0622e-06	SPAD_BOP_AY16
A09_84507309	A09	84507309	5.44179e-06	SPAD_BOP_AY16
A09_84507309	A09	84507309	5.95816e-07	D_SPAD_AY16
A09_84511921	A09	84511921	5.19431e-06	SPAD_BOP_AY16
A09_84511921	A09	84511921	9.93413e-07	D_SPAD_AY16
A09_84515965	A09	84515965	1.49436e-06	D_SPAD_AY16
A09_84515965	A09	84515965	9.99084e-06	SPAD_BOP_AY16
A09_84516085	A09	84516085	2.00301e-06	D_SPAD_AY16
A09_84516085	A09	84516085	9.28178e-06	SPAD_BOP_AY16
A09_84518615	A09	84518615	2.57962e-06	D_SPAD_AY16
A09_84518615	A09	84518615	4.61275e-06	SPAD_BOP_AY16
A09_84518621	A09	84518621	1.67176e-06	D_SPAD_AY16
A09_84518621	A09	84518621	2.74419e-06	SPAD_BOP_AY16
A09_84521403	A09	84521403	1.38635e-06	D_SPAD_AY16
A09_84521403	A09	84521403	9.18426e-06	SPAD_BOP_AY16
A09_84521405	A09	84521405	1.38635e-06	D_SPAD_AY16
A09_84521405	A09	84521405	9.18426e-06	SPAD_BOP_AY16
A09_84528502	A09	84528502	2.67742e-06	D_SPAD_AY16
A09_84528502	A09	84528502	5.86409e-06	SPAD_BOP_AY16
A10_28083812	A10	28083812	1.18618e-06	BOP_blup
A10_28083812	A10	28083812	3.58171e-06	D_SPAD_blup
A10_5522516	A10	5522516	1.27591e-06	D_SPAD_AY16
A10_5522516	A10	5522516	3.45567e-06	SPAD_BOP_AY16
A10_5522570	A10	5522570	1.27591e-06	D_SPAD_AY16
A10_5522570	A10	5522570	3.45567e-06	SPAD_BOP_AY16
A10_5522765	A10	5522765	1.8789e-06	SPAD_BOP_AY16
A10_5522765	A10	5522765	8.80317e-07	D_SPAD_AY16
A10_5526303	A10	5526303	1.46278e-06	SPAD_BOP_AY16
A10_5526303	A10	5526303	6.10961e-07	D_SPAD_AY16
A10_5526321	A10	5526321	1.0063e-06	D_SPAD_AY16
A10_5526321	A10	5526321	1.81125e-06	SPAD_BOP_AY16
A10_92752457	A10	92752457	2.50092e-08	SPAD_FBP_HG16
A10_92752471	A10	92752471	2.50092e-08	SPAD_FBP_HG16
A10_92758143	A10	92758143	6.77123e-07	Ratio_ab_FBP
A10_92766894	A10	92766894	6.77123e-07	Ratio_ab_FBP
A10_92766905	A10	92766905	6.77123e-07	Ratio_ab_FBP
A11_106477897	A11	106477897	1.66132e-06	D_SPAD_AY16
A11_106477897	A11	106477897	8.09145e-06	SPAD_BOP_AY16
A11_5405143	A11	5405143	1.34547e-06	D_SPAD_blup
A11_5405143	A11	5405143	2.8069e-07	D_SPAD_AY17
A11_5405621	A11	5405621	1.40492e-06	D_SPAD_blup
A11_5405621	A11	5405621	2.89638e-07	D_SPAD_AY17
A11_5405757	A11	5405757	2.27621e-06	D_SPAD_AY17
A11_5405757	A11	5405757	6.79556e-06	D_SPAD_blup
A11_5405966	A11	5405966	2.95298e-06	D_SPAD_AY17
A11_5405966	A11	5405966	9.50377e-06	D_SPAD_blup
A11_5407475	A11	5407475	2.42369e-06	D_SPAD_blup
A11_5407475	A11	5407475	5.60065e-07	D_SPAD_AY17
A11_5407489	A11	5407489	2.58417e-06	D_SPAD_blup
A11_5407489	A11	5407489	6.2418e-07	D_SPAD_AY17
A11_5408582	A11	5408582	1.40492e-06	D_SPAD_blup
A11_5408582	A11	5408582	2.89638e-07	D_SPAD_AY17
A11_5408640	A11	5408640	4.52065e-07	D_SPAD_blup
A11_5408640	A11	5408640	9.55506e-08	D_SPAD_AY17
A11_5408721	A11	5408721	4.52065e-07	D_SPAD_blup
A11_5408721	A11	5408721	9.55506e-08	D_SPAD_AY17
A11_5410791	A11	5410791	5.20964e-06	D_SPAD_blup
A11_5410791	A11	5410791	9.3791e-07	D_SPAD_AY17
A11_5412711	A11	5412711	1.64096e-06	D_SPAD_blup
A11_5412711	A11	5412711	4.47711e-07	D_SPAD_AY17
A11_5413789	A11	5413789	4.98598e-07	D_SPAD_blup
A11_5413789	A11	5413789	7.71356e-08	D_SPAD_AY17
A11_5414027	A11	5414027	1.39653e-06	D_SPAD_blup
A11_5414027	A11	5414027	2.59475e-07	D_SPAD_AY17
A11_5415119	A11	5415119	3.36482e-06	D_SPAD_AY17
A11_5415119	A11	5415119	6.81349e-06	D_SPAD_blup
A11_5416185	A11	5416185	2.68119e-06	D_SPAD_blup
A11_5416185	A11	5416185	4.87627e-07	D_SPAD_AY17
A11_5416366	A11	5416366	1.24298e-06	D_SPAD_blup
A11_5416366	A11	5416366	2.58149e-07	D_SPAD_AY17
A11_5417609	A11	5417609	1.61361e-06	D_SPAD_blup
A11_5417609	A11	5417609	3.70531e-07	D_SPAD_AY17
A11_5418327	A11	5418327	1.40492e-06	D_SPAD_blup
A11_5418327	A11	5418327	2.89638e-07	D_SPAD_AY17
A11_5418613	A11	5418613	1.40492e-06	D_SPAD_blup
A11_5418613	A11	5418613	2.89638e-07	D_SPAD_AY17
A11_5418699	A11	5418699	1.51987e-07	D_SPAD_AY17
A11_5418699	A11	5418699	7.11537e-07	D_SPAD_blup
A11_5418813	A11	5418813	1.18137e-06	D_SPAD_blup
A11_5418813	A11	5418813	2.21095e-07	D_SPAD_AY17
A11_5419088	A11	5419088	1.61361e-06	D_SPAD_blup
A11_5419088	A11	5419088	3.70531e-07	D_SPAD_AY17
A11_5419251	A11	5419251	1.40492e-06	D_SPAD_blup
A11_5419251	A11	5419251	2.89638e-07	D_SPAD_AY17
A11_5420804	A11	5420804	4.98598e-07	D_SPAD_blup
A11_5420804	A11	5420804	7.71356e-08	D_SPAD_AY17
A11_5421354	A11	5421354	1.40492e-06	D_SPAD_blup
A11_5421354	A11	5421354	2.89638e-07	D_SPAD_AY17
A11_5421461	A11	5421461	1.18137e-06	D_SPAD_blup
A11_5421461	A11	5421461	2.21095e-07	D_SPAD_AY17
A11_5422009	A11	5422009	3.91106e-07	D_SPAD_blup
A11_5422009	A11	5422009	8.31489e-08	D_SPAD_AY17
A11_5422678	A11	5422678	4.39597e-07	D_SPAD_blup
A11_5422678	A11	5422678	6.83093e-08	D_SPAD_AY17
A11_5423038	A11	5423038	1.40492e-06	D_SPAD_blup
A11_5423038	A11	5423038	2.89638e-07	D_SPAD_AY17
A11_5423415	A11	5423415	2.79407e-06	D_SPAD_blup
A11_5423415	A11	5423415	5.17525e-07	D_SPAD_AY17
A11_5423430	A11	5423430	2.79407e-06	D_SPAD_blup
A11_5423430	A11	5423430	5.17525e-07	D_SPAD_AY17
A11_5428773	A11	5428773	1.40492e-06	D_SPAD_blup
A11_5428773	A11	5428773	2.89638e-07	D_SPAD_AY17
A11_5428931	A11	5428931	1.77792e-06	D_SPAD_blup
A11_5428931	A11	5428931	3.22651e-07	D_SPAD_AY17
A11_5429063	A11	5429063	4.52065e-07	D_SPAD_blup
A11_5429063	A11	5429063	9.55506e-08	D_SPAD_AY17
A11_5429111	A11	5429111	4.52065e-07	D_SPAD_blup
A11_5429111	A11	5429111	9.55506e-08	D_SPAD_AY17
A11_5429138	A11	5429138	4.52065e-07	D_SPAD_blup
A11_5429138	A11	5429138	9.55506e-08	D_SPAD_AY17
A11_5429569	A11	5429569	2.2298e-06	D_SPAD_blup
A11_5429569	A11	5429569	6.03916e-07	D_SPAD_AY17
A11_5430381	A11	5430381	1.95166e-07	D_SPAD_blup
A11_5430381	A11	5430381	3.753e-08	D_SPAD_AY17
A11_5430381	A11	5430381	9.02879e-06	SPAD_BOP_AY17
A11_5561161	A11	5561161	3.83344e-07	D_SPAD_AY17
A11_5561161	A11	5561161	4.09296e-06	D_SPAD_blup
A11_5566620	A11	5566620	2.89589e-07	D_SPAD_AY17
A11_5566620	A11	5566620	3.63237e-06	D_SPAD_blup
A11_5588967	A11	5588967	2.89589e-07	D_SPAD_AY17
A11_5588967	A11	5588967	3.63237e-06	D_SPAD_blup
A12_10742829	A12	10742829	4.45808e-07	FBP_blup
A12_108712682	A12	108712682	6.03852e-06	SPAD_BOP_AY17
A12_108712682	A12	108712682	7.45484e-07	D_SPAD_AY17
A12_12594279	A12	12594279	1.50462e-06	D_SPAD_blup
A12_12594279	A12	12594279	3.84204e-06	D_SPAD_AY17
A12_12594279	A12	12594279	5.06759e-06	SPAD_BOP_AY17
A12_4122962	A12	4122962	1.58207e-06	Chlb_FBP
A12_4122962	A12	4122962	1.66382e-06	Total_ab_FBP
A12_57300701	A12	57300701	3.69822e-07	D_SPAD_AY16
A12_57300709	A12	57300709	3.69822e-07	D_SPAD_AY16
A12_57300744	A12	57300744	9.52116e-07	D_SPAD_AY16
A12_57300747	A12	57300747	9.52116e-07	D_SPAD_AY16
A12_57301023	A12	57301023	3.73659e-07	D_SPAD_AY16
A12_57301024	A12	57301024	3.73659e-07	D_SPAD_AY16
A12_57302090	A12	57302090	2.08046e-06	SPAD_BOP_AY16
A12_57302090	A12	57302090	5.72601e-07	D_SPAD_AY16
A12_57302136	A12	57302136	1.00614e-06	D_SPAD_AY16
A12_57302136	A12	57302136	1.52623e-06	SPAD_BOP_AY16
A12_57302141	A12	57302141	1.00614e-06	D_SPAD_AY16
A12_57302141	A12	57302141	1.52623e-06	SPAD_BOP_AY16
A12_57302144	A12	57302144	1.00614e-06	D_SPAD_AY16
A12_57302144	A12	57302144	1.52623e-06	SPAD_BOP_AY16
A12_57302146	A12	57302146	1.00614e-06	D_SPAD_AY16
A12_57302146	A12	57302146	1.52623e-06	SPAD_BOP_AY16
A12_57302463	A12	57302463	1.4947e-07	SPAD_BOP_AY16
A12_57302463	A12	57302463	3.39863e-06	D_SPAD_AY16
A12_57302469	A12	57302469	1.4947e-07	SPAD_BOP_AY16
A12_57302469	A12	57302469	3.39863e-06	D_SPAD_AY16
A12_57302685	A12	57302685	3.02324e-06	D_SPAD_AY16
A12_57302685	A12	57302685	8.26482e-06	SPAD_BOP_AY16
A12_57302707	A12	57302707	6.15514e-06	D_SPAD_AY16
A12_57302707	A12	57302707	8.61643e-06	SPAD_BOP_AY16
A12_62551488	A12	62551488	8.82772e-08	D_ratio_ab
A12_62551503	A12	62551503	1.90134e-07	D_ratio_ab
A12_70740474	A12	70740474	4.89583e-06	D_SPAD_blup
A12_70740474	A12	70740474	5.18589e-06	D_ratio_ab
A12_70740474	A12	70740474	6.67132e-06	D_SPAD_AY17
A13_77580822	A13	77580822	9.66739e-07	BOP_blup
A13_77580833	A13	77580833	1.32065e-06	SPAD_BOP_AY16
A13_77580833	A13	77580833	1.61575e-06	BOP_blup
A13_77580834	A13	77580834	1.32065e-06	SPAD_BOP_AY16
A13_77580834	A13	77580834	1.61575e-06	BOP_blup
D01_51415287	D01	51415287	4.05958e-06	BOP_blup
D01_51415287	D01	51415287	9.67603e-06	D_SPAD_blup
D01_51415298	D01	51415298	4.05958e-06	BOP_blup
D01_51415298	D01	51415298	9.67603e-06	D_SPAD_blup
D01_57675353	D01	57675353	5.53501e-07	Ratio_ab_FBP
D01_57675353	D01	57675353	6.94513e-06	Chla_FBP
D01_57675358	D01	57675358	5.53501e-07	Ratio_ab_FBP
D01_57675358	D01	57675358	6.94513e-06	Chla_FBP
D01_60671138	D01	60671138	1.69778e-06	D_SPAD_blup
D01_60671138	D01	60671138	5.45855e-06	D_SPAD_AY17
D01_60671152	D01	60671152	1.69778e-06	D_SPAD_blup
D01_60671152	D01	60671152	5.45855e-06	D_SPAD_AY17
D01_60671163	D01	60671163	1.69778e-06	D_SPAD_blup
D01_60671163	D01	60671163	5.45855e-06	D_SPAD_AY17
D01_60671168	D01	60671168	1.69778e-06	D_SPAD_blup
D01_60671168	D01	60671168	5.45855e-06	D_SPAD_AY17
D01_60671169	D01	60671169	1.69778e-06	D_SPAD_blup
D01_60671169	D01	60671169	5.45855e-06	D_SPAD_AY17
D01_60671170	D01	60671170	1.69778e-06	D_SPAD_blup
D01_60671170	D01	60671170	5.45855e-06	D_SPAD_AY17
D01_60671194	D01	60671194	1.69778e-06	D_SPAD_blup
D01_60671194	D01	60671194	5.45855e-06	D_SPAD_AY17
D01_60671202	D01	60671202	1.69778e-06	D_SPAD_blup
D01_60671202	D01	60671202	5.45855e-06	D_SPAD_AY17
D02_23837463	D02	23837463	6.77123e-07	Ratio_ab_FBP
D02_26506414	D02	26506414	6.77123e-07	Ratio_ab_FBP
D02_26506424	D02	26506424	6.77123e-07	Ratio_ab_FBP
D02_32314480	D02	32314480	7.21488e-06	D_SPAD_AY17
D02_32314480	D02	32314480	8.50674e-06	SPAD_BOP_AY17
D02_67476213	D02	67476213	1.42878e-07	D_ratio_ab
D02_67476218	D02	67476218	1.42878e-07	D_ratio_ab
D06_55810942	D06	55810942	9.55836e-07	Ratio_ab_BOP
D06_55810962	D06	55810962	9.55836e-07	Ratio_ab_BOP
D06_55811554	D06	55811554	5.49384e-07	Ratio_ab_BOP
D06_55811564	D06	55811564	5.49384e-07	Ratio_ab_BOP
D06_55811571	D06	55811571	5.49384e-07	Ratio_ab_BOP
D06_55812295	D06	55812295	3.31042e-07	Ratio_ab_BOP
D06_55812305	D06	55812305	3.31042e-07	Ratio_ab_BOP
D06_55812307	D06	55812307	3.31042e-07	Ratio_ab_BOP
D06_55812310	D06	55812310	3.31042e-07	Ratio_ab_BOP
D06_55834291	D06	55834291	4.80595e-07	Ratio_ab_BOP
D06_55834305	D06	55834305	4.80595e-07	Ratio_ab_BOP
D06_55834327	D06	55834327	4.80595e-07	Ratio_ab_BOP
D06_55834334	D06	55834334	4.80595e-07	Ratio_ab_BOP
D06_55834336	D06	55834336	4.80595e-07	Ratio_ab_BOP
D06_55834349	D06	55834349	4.80595e-07	Ratio_ab_BOP
D06_55834769	D06	55834769	5.08984e-07	Ratio_ab_BOP
D06_55834772	D06	55834772	5.08984e-07	Ratio_ab_BOP
D06_55834774	D06	55834774	5.08984e-07	Ratio_ab_BOP
D06_55834775	D06	55834775	5.08984e-07	Ratio_ab_BOP
D06_55834779	D06	55834779	5.08984e-07	Ratio_ab_BOP
D06_55834780	D06	55834780	5.08984e-07	Ratio_ab_BOP
D06_55834787	D06	55834787	5.08984e-07	Ratio_ab_BOP
D06_55834790	D06	55834790	5.08984e-07	Ratio_ab_BOP
D06_55834798	D06	55834798	5.08984e-07	Ratio_ab_BOP
D06_55834822	D06	55834822	1.17321e-07	Ratio_ab_BOP
D06_55834849	D06	55834849	6.39748e-08	Ratio_ab_BOP
D06_55834849	D06	55834849	7.62735e-06	D_ratio_ab
D06_55834935	D06	55834935	2.9258e-06	Ratio_ab_BOP
D06_55834935	D06	55834935	7.78247e-06	D_SPAD_HG17
D06_55834939	D06	55834939	3.24712e-06	Ratio_ab_BOP
D06_55834939	D06	55834939	3.83984e-06	D_SPAD_HG17
D06_55930177	D06	55930177	2.80214e-06	Ratio_ab_BOP
D06_55930177	D06	55930177	4.49279e-06	D_SPAD_HG17
D06_55930254	D06	55930254	4.83037e-06	D_SPAD_HG17
D06_55930254	D06	55930254	4.89078e-06	Ratio_ab_BOP
D06_56931787	D06	56931787	6.068e-07	Ratio_ab_BOP
D06_56931793	D06	56931793	6.068e-07	Ratio_ab_BOP
D06_56931797	D06	56931797	6.068e-07	Ratio_ab_BOP
D06_56931819	D06	56931819	6.37264e-07	Ratio_ab_BOP
D06_57093585	D06	57093585	4.80595e-07	Ratio_ab_BOP
D07_11391599	D07	11391599	2.4409e-07	SPAD_FBP_HG17
D07_11399241	D07	11399241	5.57155e-07	SPAD_FBP_HG17
D07_26125332	D07	26125332	3.20798e-12	Ratio_ab_FBP
D07_26125332	D07	26125332	4.28961e-07	D_ratio_ab
D07_26125332	D07	26125332	5.02176e-06	Chlb_FBP
D07_510517	D07	510517	8.22373e-07	Ratio_ab_BOP
D08_43939104	D08	43939104	2.23519e-07	Chlb_FBP
D10_65525602	D10	65525602	6.20846e-06	SPAD_BOP_AY17
D10_65525602	D10	65525602	8.7727e-06	BOP_blup
D10_67265400	D10	67265400	5.04224e-07	D_SPAD_AY17
D10_67265400	D10	67265400	6.92153e-07	SPAD_BOP_AY17
D11_10009692	D11	10009692	9.20555e-07	FBP_blup
D11_10020608	D11	10020608	9.91321e-07	FBP_blup
D11_10020625	D11	10020625	9.09398e-07	FBP_blup
D11_10022039	D11	10022039	8.56677e-07	FBP_blup
D11_10025122	D11	10025122	7.20548e-07	FBP_blup
D11_10027668	D11	10027668	4.06864e-07	FBP_blup
D11_10029331	D11	10029331	4.04092e-07	FBP_blup
D11_10029563	D11	10029563	6.83207e-07	FBP_blup
D11_10030147	D11	10030147	8.16213e-07	FBP_blup
D11_10031970	D11	10031970	5.15091e-07	FBP_blup
D11_10032432	D11	10032432	5.78202e-07	FBP_blup
D11_10034822	D11	10034822	4.34786e-07	FBP_blup
D11_10034835	D11	10034835	6.8051e-07	FBP_blup
D11_10038101	D11	10038101	4.55513e-07	FBP_blup
D11_10039843	D11	10039843	9.3071e-07	FBP_blup
D11_10039987	D11	10039987	8.89299e-07	FBP_blup
D11_10040817	D11	10040817	4.2334e-07	FBP_blup
D11_10041407	D11	10041407	3.86326e-07	FBP_blup
D11_10044788	D11	10044788	7.39413e-07	FBP_blup
D11_10044973	D11	10044973	5.61299e-07	FBP_blup
D11_10044983	D11	10044983	3.73093e-07	FBP_blup
D11_10045100	D11	10045100	3.1589e-07	FBP_blup
D11_10045163	D11	10045163	3.61982e-07	FBP_blup
D11_10045748	D11	10045748	2.93285e-07	FBP_blup
D11_10046213	D11	10046213	5.13881e-07	FBP_blup
D11_10047574	D11	10047574	5.82346e-07	FBP_blup
D11_10047617	D11	10047617	5.51112e-07	FBP_blup
D11_10057757	D11	10057757	6.96663e-07	FBP_blup
D11_10058028	D11	10058028	7.73473e-07	FBP_blup
D11_10059093	D11	10059093	4.95624e-07	FBP_blup
D11_10059244	D11	10059244	4.92691e-07	FBP_blup
D11_10059477	D11	10059477	2.50745e-07	FBP_blup
D11_10059913	D11	10059913	2.59332e-07	FBP_blup
D11_10060088	D11	10060088	7.44808e-07	FBP_blup
D11_10060376	D11	10060376	4.8999e-07	FBP_blup
D11_10060413	D11	10060413	7.72729e-07	FBP_blup
D11_9657009	D11	9657009	9.33917e-07	FBP_blup
D11_9700573	D11	9700573	9.29338e-07	FBP_blup
D11_9714169	D11	9714169	9.85802e-07	FBP_blup
D11_9737274	D11	9737274	7.30692e-07	FBP_blup
D11_9756413	D11	9756413	4.06896e-07	FBP_blup
D11_9761554	D11	9761554	9.1387e-07	FBP_blup
D11_9761678	D11	9761678	5.96159e-07	FBP_blup
D11_9767846	D11	9767846	1.63e-06	FBP_blup
D11_9767846	D11	9767846	9.70851e-06	SPAD_FBP_HG16
D11_9780815	D11	9780815	5.57461e-06	FBP_blup
D11_9780815	D11	9780815	8.77127e-06	SPAD_FBP_HG16
D11_9818918	D11	9818918	9.47805e-07	FBP_blup
D11_9995907	D11	9995907	8.22932e-07	FBP_blup
D12_23540511	D12	23540511	1.48676e-07	D_SPAD_AY16
D12_23540519	D12	23540519	1.48676e-07	D_SPAD_AY16
D12_23540533	D12	23540533	1.48676e-07	D_SPAD_AY16
D12_23540553	D12	23540553	5.79185e-07	D_SPAD_AY16
D12_23540562	D12	23540562	9.16313e-10	D_SPAD_AY16
D12_23540566	D12	23540566	9.16313e-10	D_SPAD_AY16
D12_23540570	D12	23540570	9.16313e-10	D_SPAD_AY16
D12_23540575	D12	23540575	9.16313e-10	D_SPAD_AY16
D12_23540583	D12	23540583	3.76996e-07	D_SPAD_AY16
D12_37359379	D12	37359379	3.31636e-06	D_total_ab
D12_37359379	D12	37359379	8.77237e-06	Chla_BOP
D12_38634704	D12	38634704	1.11348e-07	BOP_blup
D12_38634704	D12	38634704	2.78466e-07	SPAD_BOP_HG16
D12_38634704	D12	38634704	3.23962e-06	SPAD_FBP_HG16
D12_38939149	D12	38939149	4.25755e-07	SPAD_BOP_HG16
D12_39149657	D12	39149657	1.07487e-06	BOP_blup
D12_39149657	D12	39149657	6.81018e-07	SPAD_BOP_HG16
D12_39355730	D12	39355730	3.21844e-06	SPAD_BOP_HG16
D12_39355730	D12	39355730	6.75765e-06	BOP_blup
D12_39355949	D12	39355949	5.56882e-06	SPAD_BOP_HG16
D12_39355949	D12	39355949	7.56201e-06	BOP_blup
D12_39460380	D12	39460380	2.78769e-07	BOP_blup
D12_39606106	D12	39606106	1.58573e-07	BOP_blup
D12_39606106	D12	39606106	9.89637e-06	SPAD_BOP_HG16
D12_39702247	D12	39702247	1.56687e-07	BOP_blup
D12_40548660	D12	40548660	2.08318e-06	BOP_blup
D12_40548660	D12	40548660	9.51689e-07	SPAD_FBP_HG16
D12_40700182	D12	40700182	3.28292e-07	SPAD_FBP_HG16
D12_40700182	D12	40700182	4.3223e-06	BOP_blup
D12_40700182	D12	40700182	5.27084e-06	SPAD_BOP_HG16
D12_41103572	D12	41103572	4.94034e-06	SPAD_FBP_HG16
D12_41103572	D12	41103572	5.81969e-06	BOP_blup
D12_56042965	D12	56042965	5.83715e-06	Ratio_ab_BOP
D12_56042965	D12	56042965	7.99934e-06	D_ratio_ab
D12_56113760	D12	56113760	2.18465e-06	D_ratio_ab
D12_56113760	D12	56113760	3.09571e-06	Ratio_ab_BOP
D12_56113836	D12	56113836	2.03771e-06	D_ratio_ab
D12_56113836	D12	56113836	8.01982e-06	Ratio_ab_BOP
D12_56128948	D12	56128948	9.08277e-07	D_ratio_ab
D12_56136370	D12	56136370	1.7155e-06	D_ratio_ab
D12_56136370	D12	56136370	8.11479e-06	Ratio_ab_BOP
D13_26198804	D13	26198804	2.87957e-07	D_SPAD_AY17
D13_26198804	D13	26198804	4.46025e-07	SPAD_BOP_AY17
D13_64827390	D13	64827390	6.77123e-07	Ratio_ab_FBP
D13_64827394	D13	64827394	6.77123e-07	Ratio_ab_FBP
D13_64827424	D13	64827424	6.77123e-07	Ratio_ab_FBP

## Sheet: Table S4
Table S4 List of candidate genes associated with cotton senescnece.
Genes	Chromosome	Start (bp)	End (bp)	Homologs	Descprits
Gohir.A02G046500	A02	6576737	6579090	AT4G15630	Uncharacterised protein family (UPF0497)
Gohir.A02G046600	A02	6579316	6581938	AT5G18650	CHY-type/CTCHY-type/RING-type Zinc finger protein
Gohir.A02G046700	A02	6586489	6590463	AT5G18640	alpha/beta-Hydrolases superfamily protein
Gohir.A03G031400	A03	5888258	5891516	AT2G28060	5'-AMP-activated protein kinase beta-2 subunit protein
Gohir.A03G031450	A03	5895264	5896211	AT5G07900	Mitochondrial transcription termination factor family protein
Gohir.A03G031500	A03	5940281	5945300	AT5G60760	P-loop containing nucleoside triphosphate hydrolases superfamily protein
Gohir.A03G031600	A03	5958937	5967672	AT3G45100	UDP-Glycosyltransferase superfamily protein
Gohir.A03G031700	A03	5968120	5973028	AT5G04250	Cysteine proteinases superfamily protein
Gohir.A03G031800	A03	6007788	6012264	AT2G27990	BEL1-like homeodomain 8
Gohir.A03G032000	A03	6049770	6055316	AT2G28250	Protein kinase superfamily protein
Gohir.A03G032100	A03	6060596	6063939	AT2G28260	cyclic nucleotide-gated channel 15
Gohir.A03G032300	A03	6201109	6205463	AT2G37210	lysine decarboxylase family protein
Gohir.A03G032400	A03	6222070	6226329	AT5G60700	glycosyltransferase family protein 2
Gohir.A03G032500	A03	6228752	6234915	AT2G28310	Protein of unknown function (DUF707)
Gohir.A03G032600	A03	6240708	6245227	AT2G28315	Nucleotide/sugar transporter family protein
Gohir.A03G032700	A03	6256343	6265172	AT2G28320	Pleckstrin homology (PH) and lipid-binding START domains-containing protein
Gohir.A03G032800	A03	6267890	6273284	AT1G08030	tyrosylprotein sulfotransferase
Gohir.A03G032900	A03	6274511	6277779	AT1G08010	GATA transcription factor 11
Gohir.A03G033000	A03	6293735	6297076	AT2G28350	auxin response factor 10
Gohir.A03G033100	A03	6303869	6311055	AT1G07990	SIT4 phosphatase-associated family protein
Gohir.A03G033200	A03	6355169	6360937	AT5G60690	Homeobox-leucine zipper family protein / lipid-binding START domain-containing protein
Gohir.A03G033266	A03	6383641	6385253	AT1G10330	Tetratricopeptide repeat (TPR)-like superfamily protein
Gohir.A03G033332	A03	6385316	6386317	AT2G28380	dsRNA-binding protein 2
Gohir.A03G033400	A03	6391579	6394850	AT2G28380	dsRNA-binding protein 2
Gohir.A03G033500	A03	6402539	6408192	AT2G28390	SAND family protein
Gohir.A03G033600	A03	6483174	6484194	AT5G60680	Protein of unknown function, DUF584
Gohir.A03G033666	A03	6537585	6540651
Gohir.A03G033732	A03	6542433	6543257
Gohir.A03G033800	A03	6547939	6549712	AT5G60660	plasma membrane intrinsic protein 2;4
Gohir.A03G033900	A03	6555313	6556138	AT2G28410
Gohir.A03G034000	A03	6557280	6560798	AT5G27430	Signal peptidase subunit
Gohir.A03G034100	A03	6568307	6572200	AT5G60640	PDI-like 1-4
Gohir.A03G034200	A03	6575646	6576614	AT3G45230	hydroxyproline-rich glycoprotein family protein
Gohir.A03G034300	A03	6577155	6581720	AT5G60580	RING/U-box superfamily protein
Gohir.A03G034400	A03	6607609	6613242	AT2G28450	zinc finger (CCCH-type) family protein
Gohir.A03G034500	A03	6616324	6620362	AT2G41060	RNA-binding (RRM/RBD/RNP motifs) family protein
Gohir.A03G034600	A03	6622117	6630329	AT5G21160	LA RNA-binding protein
Gohir.A03G034700	A03	6647356	6650745	AT5G21090	Leucine-rich repeat (LRR) family protein
Gohir.A03G034800	A03	6657495	6658226	AT3G20770	Ethylene insensitive 3 family protein
Gohir.A03G034900	A03	6658280	6659979	AT3G20770	Ethylene insensitive 3 family protein
Gohir.A03G035000	A03	6671514	6672530	AT5G23530	carboxyesterase 18
Gohir.A03G115800	A03	83816151	83817017	AT2G02130	low-molecular-weight cysteine-rich 68
Gohir.A03G115900	A03	83688562	83695428	AT2G02090	SNF2 domain-containing protein / helicase domain-containing protein
Gohir.A03G115938	A03	83807293	83807857	AT1G61070	low-molecular-weight cysteine-rich 66
Gohir.A03G116000	A03	83207629	83212208	AT1G14570	UBX domain-containing protein
Gohir.A03G116100	A03	83095774	83097250	AT4G17910	transferases, transferring acyl groups
Gohir.A03G116200	A03	83009180	83013155	AT2G02080	indeterminate(ID)-domain 4
Gohir.A03G116238	A03	83092950	83093702
Gohir.A06G012200	A06	1131276	1133045	AT4G36830	GNS1/SUR4 membrane protein family
Gohir.A06G012300	A06	1135963	1137539	AT1G19310	RING/U-box superfamily protein
Gohir.A06G012400	A06	1141729	1142802	AT1G19300	Nucleotide-diphospho-sugar transferases superfamily protein
Gohir.A06G012500	A06	1146206	1147206	AT3G50770	calmodulin-like 41
Gohir.A06G012600	A06	1148470	1152275	AT1G47510	inositol polyphosphate 5-phosphatase 11
Gohir.A06G012700	A06	1154207	1155882	AT1G74970	ribosomal protein S9
Gohir.A06G012800	A06	1156326	1160623	AT3G14470	NB-ARC domain-containing disease resistance protein
Gohir.A06G012825	A06	1164480	1165859	AT1G69550	disease resistance protein (TIR-NBS-LRR class)
Gohir.A06G012850	A06	1165984	1166493	AT3G14460	LRR and NB-ARC domains-containing disease resistance protein
Gohir.A06G012875	A06	1166458	1168354	AT3G14470	NB-ARC domain-containing disease resistance protein
Gohir.A06G012900	A06	1169600	1173572	AT5G42660	Protein of unknown function (DUF616)
Gohir.A06G013000	A06	1173213	1175656	AT4G19390	Uncharacterised protein family (UPF0114)
Gohir.A06G013100	A06	1178253	1180734	AT1G48460
Gohir.A06G013200	A06	1186152	1187902	AT5G42650	allene oxide synthase
Gohir.A06G013300	A06	1192943	1206098
Gohir.A06G013400	A06	1207316	1208572	AT5G42650	allene oxide synthase
Gohir.A06G013500	A06	1212330	1216543	AT2G23450	Protein kinase superfamily protein
Gohir.A06G013600	A06	1220750	1221432
Gohir.A06G013700	A06	1255127	1256998	AT2G26490	Transducin/WD40 repeat-like superfamily protein
Gohir.A06G013801	A06	1290875	1294883	AT3G13690	Protein kinase protein with adenine nucleotide alpha hydrolases-like domain
Gohir.A06G013900	A06	1299006	1306680	AT4G31940	cytochrome P450, family 82, subfamily C, polypeptide 4
Gohir.A06G014000	A06	1329432	1331512	AT4G31940	cytochrome P450, family 82, subfamily C, polypeptide 4
Gohir.A06G014050	A06	1333105	1334886	AT4G31950	cytochrome P450, family 82, subfamily C, polypeptide 3
Gohir.A06G014100	A06	1338113	1340388	AT4G31940	cytochrome P450, family 82, subfamily C, polypeptide 4
Gohir.A06G014200	A06	1343539	1346342	AT4G31940	cytochrome P450, family 82, subfamily C, polypeptide 4
Gohir.A06G014400	A06	1403120	1407486	AT4G31940	cytochrome P450, family 82, subfamily C, polypeptide 4
Gohir.A06G014500	A06	1435385	1437504	AT4G31940	cytochrome P450, family 82, subfamily C, polypeptide 4
Gohir.A06G014600	A06	1443885	1445566	AT4G31940	cytochrome P450, family 82, subfamily C, polypeptide 4
Gohir.A06G014700	A06	1448448	1450449	AT4G31940	cytochrome P450, family 82, subfamily C, polypeptide 4
Gohir.A06G014800	A06	1457338	1459166	AT4G31940	cytochrome P450, family 82, subfamily C, polypeptide 4
Gohir.A06G014900	A06	1471413	1474460	AT5G42630	Homeodomain-like superfamily protein
Gohir.A06G015000	A06	1501960	1504540	AT1G47640
Gohir.A06G015100	A06	1507350	1510943	AT4G37100	Pyridoxal phosphate (PLP)-dependent transferases superfamily protein
Gohir.A06G015200	A06	1522341	1525753	AT5G25900	GA requiring 3
Gohir.A06G015300	A06	1527305	1531069	AT1G47670	Transmembrane amino acid transporter family protein
Gohir.A06G015400	A06	1539972	1543038	AT1G06870	Peptidase S24/S26A/S26B/S26C family protein
Gohir.A06G015500	A06	1548986	1553310	AT2G26510	Xanthine/uracil permease family protein
Gohir.A06G015600	A06	1557813	1558734	AT3G57500
Gohir.A06G015700	A06	1559029	1562718	AT5G06430	Thioredoxin superfamily protein
Gohir.A06G015800	A06	1559052	1562718	AT5G52780	Protein of unknown function (DUF3464)
Gohir.A06G015850	A06	1560797	1561557	AT5G52780	Protein of unknown function (DUF3464)
Gohir.A06G015900	A06	1563953	1564895	AT2G15780	Cupredoxin superfamily protein
Gohir.A06G016000	A06	1571266	1572163	AT5G67300	myb domain protein r1
Gohir.A06G016100	A06	1579324	1585552	AT5G36210	alpha/beta-Hydrolases superfamily protein
Gohir.A06G016200	A06	1587028	1590901	AT5G42690	Protein of unknown function, DUF547
Gohir.A06G016400	A06	1607573	1612460	AT1G47490	RNA-binding protein 47C
Gohir.A06G016500	A06	1614243	1616437
Gohir.A06G016600	A06	1621975	1629609	AT4G11800	Calcineurin-like metallo-phosphoesterase superfamily protein
Gohir.A06G016650	A06	1633045	1637728	AT2G26560	phospholipase A 2A
Gohir.A06G016700	A06	1639208	1644890	AT2G26560	phospholipase A 2A
Gohir.A06G016800	A06	1649808	1652525	AT5G23540	Mov34/MPN/PAD-1 family protein
Gohir.A06G016900	A06	1653460	1656340	AT1G47420	succinate dehydrogenase 5
Gohir.A06G017000	A06	1656889	1657891	AT1G47410
Gohir.A06G017100	A06	1659441	1662851
Gohir.A06G017200	A06	1664069	1668775	AT4G33380
Gohir.A06G017300	A06	1677435	1683305	AT1G47380	Protein phosphatase 2C family protein
Gohir.A06G017400	A06	1689745	1690617	AT5G42750	BRI1 kinase inhibitor 1
Gohir.A06G017500	A06	1699678	1706916	AT5G42870	phosphatidic acid phosphohydrolase 2
Gohir.A06G017600	A06	1713610	1713900
Gohir.A06G017700	A06	1730025	1730318
Gohir.A06G017800	A06	1732742	1733462	AT5G19360	calcium-dependent protein kinase 34
Gohir.A06G017900	A06	1737869	1738588	AT1G18210	Calcium-binding EF-hand family protein
Gohir.A06G018100	A06	1709553	1709846
Gohir.A06G018101	A06	1799917	1800826	AT2G43290	Calcium-binding EF-hand family protein
Gohir.A06G018300	A06	1814902	1815496	AT1G24620	EF hand calcium-binding protein family
Gohir.A06G018400	A06	1856783	1860619	AT4G33330	plant glycogenin-like starch initiation protein 3
Gohir.A06G018500	A06	1862852	1868024	AT2G26570	Plant protein of unknown function (DUF827)
Gohir.A06G018600	A06	1868775	1871634	AT4G33400	Vacuolar import/degradation, Vid27-related protein
Gohir.A06G018633	A06	1875729	1878383	AT5G42890	sterol carrier protein 2
Gohir.A06G018666	A06	1884397	1886352	AT4G17650	Polyketide cyclase / dehydrase and lipid transport protein
Gohir.A06G018700	A06	1887627	1890856	AT5G42900	cold regulated gene 27
Gohir.A06G018800	A06	1892629	1898003	AT5G09890	Protein kinase family protein
Gohir.A06G018900	A06	1902033	1905318	AT1G45230	Protein of unknown function (DUF3223)
Gohir.A06G019000	A06	1907783	1913567	AT1G45231
Gohir.A06G019100	A06	1925409	1929805	AT1G45207
Gohir.A06G019200	A06	1945130	1945744	AT3G50330	basic helix-loop-helix (bHLH) DNA-binding superfamily protein
Gohir.A06G019300	A06	1959668	1962692	AT3G49180	Transducin/WD40 repeat-like superfamily protein
Gohir.A06G019400	A06	1976844	1978378	AT1G46264	heat shock transcription factor B4
Gohir.A06G019500	A06	2015689	2016467	AT5G67070	ralf-like 34
Gohir.A06G019600	A06	2026563	2029014	AT1G45688
Gohir.A06G019650	A06	2036845	2043163	AT5G42830	HXXXD-type acyl-transferase family protein
Gohir.A06G019700	A06	2047577	2049874	AT5G67090	Subtilisin-like serine endopeptidase family protein
Gohir.A06G019750	A06	2063987	2065543	AT5G07850	HXXXD-type acyl-transferase family protein
Gohir.A06G019800	A06	2076577	2078090	AT5G42830	HXXXD-type acyl-transferase family protein
Gohir.A06G019900	A06	2094983	2096344	AT5G42830	HXXXD-type acyl-transferase family protein
Gohir.A06G020000	A06	2104659	2109280	AT5G42940	RING/U-box superfamily protein
Gohir.A06G020100	A06	2115413	2118271	AT5G67090	Subtilisin-like serine endopeptidase family protein
Gohir.A06G020200	A06	2145332	2147174	AT5G42830	HXXXD-type acyl-transferase family protein
Gohir.A06G020300	A06	2155101	2156862	AT5G42830	HXXXD-type acyl-transferase family protein
Gohir.A06G020400	A06	2158422	2162764	AT4G34110	poly(A) binding protein 2
Gohir.A06G143200	A06	113046724	113049493	AT3G04770	40s ribosomal protein SA B
Gohir.A06G143300	A06	113065222	113066286	AT1G53903	Protein of unknown function (DUF581)
Gohir.A06G143350	A06	113099634	113099986	AT4G15910	drought-induced 21
Gohir.A06G143400	A06	113115158	113122567	AT3G14270	phosphatidylinositol-4-phosphate 5-kinase family protein
Gohir.A06G143500	A06	113121861	113123598	AT3G14280
Gohir.A06G143600	A06	113292045	113296553	AT3G14290	20S proteasome alpha subunit E2
Gohir.A06G143700	A06	113298057	113301364	AT1G53840	pectin methylesterase 1
Gohir.A06G143750	A06	113781884	113783633	AT1G17410	Nucleoside diphosphate kinase family protein
Gohir.A06G143800	A06	113954277	113960042	AT3G14075	Mono-/di-acylglycerol lipase, N-terminal;Lipase, class 3
Gohir.A06G143900	A06	113960916	113964540	AT4G18975	Pentatricopeptide repeat (PPR) superfamily protein
Gohir.A06G144000	A06	114009011	114015091	AT1G54100	aldehyde dehydrogenase 7B4
Gohir.A06G144200	A06	114124328	114129068	AT1G54115	cation calcium exchanger 4
Gohir.A06G144300	A06	114198549	114198905
Gohir.A06G144400	A06	114340498	114358389	AT5G49880	mitotic checkpoint family protein
Gohir.A06G144500	A06	114744858	114748712	AT1G59740	Major facilitator superfamily protein
Gohir.A06G144600	A06	114884837	114898324	AT2G02560	cullin-associated and neddylation dissociated
Gohir.A06G144633	A06	114917408	114927968	AT2G36740	sequence-specific DNA binding transcription factors;DNA binding;DNA binding
Gohir.A06G144666	A06	114929176	114929821
Gohir.A06G144700	A06	114999524	115011133	AT1G59760	RNA helicase, ATP-dependent, SK12/DOB1 protein
Gohir.A08G093600	A08	49428650	49432498	AT5G53420	CCT motif family protein
Gohir.A08G093662	A08	50024386	50024730	ATCG01230	ribosomal protein S12B
Gohir.A08G097600	A08	50106692	50109229	AT5G52960
Gohir.A09G128100	A09	71537543	71544311	AT2G42080	Chaperone DnaJ-domain superfamily protein
Gohir.A09G232700	A09	83854757	83858672	AT5G18860	inosine-uridine preferring nucleoside hydrolase family protein
Gohir.A09G232800	A09	83864094	83866868	AT5G18800	Cox19-like CHCH family protein
Gohir.A09G232900	A09	83867479	83869178	AT5G18790	Ribosomal protein L33 family protein
Gohir.A09G233000	A09	83870027	83880539	AT2G28290	P-loop containing nucleoside triphosphate hydrolases superfamily protein
Gohir.A09G233050	A09	83881031	83889156	AT2G28290	P-loop containing nucleoside triphosphate hydrolases superfamily protein
Gohir.A09G233100	A09	83890771	83892731	AT1G54630	acyl carrier protein 3
Gohir.A09G233200	A09	83897273	83903572	AT3G05030	sodium hydrogen exchanger 2
Gohir.A09G233400	A09	83918465	83921625	AT4G15563
Gohir.A09G233500	A09	83922374	83925075	AT4G15610	Uncharacterised protein family (UPF0497)
Gohir.A09G233600	A09	83917341	83918134
Gohir.A09G233900	A09	83930784	83934779	AT3G21465
Gohir.A09G234000	A09	83936517	83937840
Gohir.A09G234100	A09	83939992	83940845	AT5G49480	Ca2+-binding protein 1
Gohir.A09G234200	A09	83943553	83947198	AT3G17090	Protein phosphatase 2C family protein
Gohir.A09G234300	A09	83953681	83954814	AT2G16920	ubiquitin-conjugating enzyme 23
Gohir.A09G234400	A09	83957485	83962004	AT2G23540	GDSL-like Lipase/Acylhydrolase superfamily protein
Gohir.A09G234450	A09	83963715	83964143
Gohir.A09G234500	A09	83966128	83966706
Gohir.A09G234600	A09	83972430	83976855	AT3G06620	PAS domain-containing protein tyrosine kinase family protein
Gohir.A09G234700	A09	83982687	83988687	AT3G17030	Nucleic acid-binding proteins superfamily
Gohir.A09G234800	A09	83990165	83992362	AT3G50150	Plant protein of unknown function (DUF247)
Gohir.A09G234900	A09	83993148	83995407	AT3G17000	ubiquitin-conjugating enzyme 32
Gohir.A09G234950	A09	84000445	84007152	AT3G03450	RGA-like 2
Gohir.A09G235000	A09	84007933	84010119	AT3G16990	Haem oxygenase-like, multi-helical
Gohir.A09G235100	A09	84010780	84014520	AT2G19640	ASH1-related protein 2
Gohir.A09G235200	A09	84015536	84017752	AT4G16160	Mitochondrial import inner membrane translocase subunit Tim17/Tim22/Tim23 family protein
Gohir.A09G235300	A09	84018625	84028822	AT3G06670	binding
Gohir.A09G235400	A09	84033749	84038503	AT3G16950	lipoamide dehydrogenase 1
Gohir.A09G235500	A09	84039548	84040410	AT3G06680	Ribosomal L29e protein family
Gohir.A09G235600	A09	84048819	84054382	AT5G49360	beta-xylosidase 1
Gohir.A09G235700	A09	84071252	84072340
Gohir.A09G235800	A09	84079610	84083192	AT3G16857	response regulator 1
Gohir.A09G236000	A09	84097307	84099737	AT5G49230	Drought-responsive family protein
Gohir.A09G236100	A09	84099971	84102077	AT5G49220	Protein of unknown function (DUF789)
Gohir.A09G236200	A09	84105837	84109737	AT1G66070	Translation initiation factor eIF3 subunit
Gohir.A09G236300	A09	84110369	84113485	AT3G06770	Pectin lyase-like superfamily protein
Gohir.A09G236400	A09	84119601	84120885	AT3G16780	Ribosomal protein L19e family protein
Gohir.A09G236500	A09	84124464	84126269	AT3G16770	ethylene-responsive element binding protein
Gohir.A09G236600	A09	84128116	84130312	AT3G06790	plastid developmental protein DAG, putative
Gohir.A09G236700	A09	84130762	84132889	AT4G18180	Pectin lyase-like superfamily protein
Gohir.A09G236900	A09	84136863	84138962	AT3G05610	Plant invertase/pectin methylesterase inhibitor superfamily
Gohir.A09G237000	A09	84180189	84182279	AT3G05610	Plant invertase/pectin methylesterase inhibitor superfamily
Gohir.A09G237100	A09	84203809	84205940	AT3G05610	Plant invertase/pectin methylesterase inhibitor superfamily
Gohir.A09G237150	A09	84223309	84225084	AT5G27870	Plant invertase/pectin methylesterase inhibitor superfamily
Gohir.A09G237200	A09	84267118	84269264	AT3G05610	Plant invertase/pectin methylesterase inhibitor superfamily
Gohir.A09G237300	A09	84292333	84294427	AT3G05610	Plant invertase/pectin methylesterase inhibitor superfamily
Gohir.A09G237400	A09	84323490	84324372	AT5G46940	Plant invertase/pectin methylesterase inhibitor superfamily protein
Gohir.A09G237500	A09	84329829	84331421	AT3G16720	TOXICOS EN LEVADURA 2
Gohir.A09G237600	A09	84334746	84335905	AT5G49170
Gohir.A09G237700	A09	84345137	84347992	AT3G06850	2-oxoacid dehydrogenases acyltransferase family protein
Gohir.A09G237800	A09	84353257	84354195	AT5G49120	Protein of unknown function (DUF581)
Gohir.A09G237900	A09	84356230	84358406	AT4G15930	Dynein light chain type 1 family protein
Gohir.A09G238000	A09	84361948	84364075	AT3G06868
Gohir.A09G238100	A09	84365771	84370165	AT4G15900	pleiotropic regulatory locus 1
Gohir.A09G238200	A09	84372753	84380298	AT3G06880	Transducin/WD40 repeat-like superfamily protein
Gohir.A09G238300	A09	84385276	84386188	AT3G06890
Gohir.A09G238400	A09	84386866	84389743	AT2G47710	Adenine nucleotide alpha hydrolases-like superfamily protein
Gohir.A09G238450	A09	84389744	84391636
Gohir.A09G238500	A09	84396031	84401804	AT3G16630	P-loop containing nucleoside triphosphate hydrolases superfamily protein
Gohir.A09G238600	A09	84402334	84405753	AT3G06920	Tetratricopeptide repeat (TPR)-like superfamily protein
Gohir.A09G238700	A09	84410744	84412322	AT4G15830	ARM repeat superfamily protein
Gohir.A09G238800	A09	84412498	84415097	AT4G15820
Gohir.A09G238900	A09	84420898	84424365	AT4G02510	translocon at the outer envelope membrane of chloroplasts 159
Gohir.A09G239000	A09	84424546	84428730	AT5G49020	protein arginine methyltransferase 4A
Gohir.A09G239050	A09	84430189	84431834	AT1G19900	glyoxal oxidase-related protein
Gohir.A09G239100	A09	84454917	84456787	AT1G19900	glyoxal oxidase-related protein
Gohir.A09G239200	A09	84460051	84466365	AT1G19900	glyoxal oxidase-related protein
Gohir.A09G239300	A09	84466733	84469347	AT3G16565	alanine-tRNA ligases;nucleic acid binding;ligases, forming aminoacyl-tRNA and related compounds;nucleotide binding;ATP binding
Gohir.A09G239400	A09	84469973	84472987	AT3G16560	Protein phosphatase 2C family protein
Gohir.A09G239500	A09	84473520	84475793	AT4G15790
Gohir.A09G239600	A09	84477347	84480070	AT4G15780	vesicle-associated membrane protein 724
Gohir.A09G239700	A09	84481768	84482812	AT5G24860	flowering promoting factor 1
Gohir.A09G239800	A09	84493065	84494147	AT1G18590	sulfotransferase 17
Gohir.A09G239900	A09	84495698	84496564	AT1G09070	soybean gene regulated by cold-2
Gohir.A09G239950	A09	84503452	84503883	AT2G47810	nuclear factor Y, subunit B5
Gohir.A09G240000	A09	84517103	84521289	AT1G09020	homolog of yeast sucrose nonfermenting 4
Gohir.A09G240100	A09	84521768	84524236	AT5G07900	Mitochondrial transcription termination factor family protein
Gohir.A09G240166	A09	84525469	84526308	AT5G18560	Integrase-type DNA-binding superfamily protein
Gohir.A09G240232	A09	84537596	84538972	AT3G26700	Protein kinase superfamily protein
Gohir.A09G240300	A09	84541669	84543209	AT5G18580	tonneau 2 (TON2)
Gohir.A09G240400	A09	84543223	84548239	AT5G18590	Galactose oxidase/kelch repeat superfamily protein
Gohir.A09G240500	A09	84555517	84556206	AT3G21460	Glutaredoxin family protein
Gohir.A09G240600	A09	84588471	84591823	AT5G18610	Protein kinase superfamily protein
Gohir.A09G240700	A09	84592147	84598671	AT3G06400	chromatin-remodeling protein 11
Gohir.A09G240800	A09	84612192	84612866	AT3G06590	basic helix-loop-helix (bHLH) DNA-binding superfamily protein
Gohir.A09G240900	A09	84632421	84634124	AT2G47260	WRKY DNA-binding protein 23
Gohir.A09G240950	A09	84646058	84646682
Gohir.A09G241000	A09	84647957	84653614	AT3G06580	Mevalonate/galactokinase family protein
Gohir.A09G241100	A09	84657627	84659819	AT3G17120
Gohir.A09G241200	A09	84660307	84661864	AT1G47980
Gohir.A09G241300	A09	84669704	84672521	AT1G56600	galactinol synthase 2
Gohir.A09G241400	A09	84674990	84684610	AT3G17205	ubiquitin protein ligase 6
Gohir.A09G241500	A09	84703397	84705709	AT5G49620	myb domain protein 78
Gohir.A09G241550	A09	84707885	84708868	AT4G38930	Ubiquitin fusion degradation UFD1 family protein
Gohir.A09G241600	A09	84710255	84714770	AT1G02400	gibberellin 2-oxidase 6
Gohir.A09G241700	A09	84726749	84729672	AT1G48100	Pectin lyase-like superfamily protein
Gohir.A09G241800	A09	84730067	84733825	AT3G62270	HCO3- transporter family
Gohir.A09G241900	A09	84745739	84747625	AT3G17350
Gohir.A09G242000	A09	84748095	84750001	AT1G48170
Gohir.A09G242100	A09	84751506	84755500	AT5G18500	Protein kinase superfamily protein
Gohir.A09G242200	A09	84756894	84758786	AT5G66520	Tetratricopeptide repeat (TPR)-like superfamily protein
Gohir.A09G242300	A09	84770185	84770953	AT3G05858
Gohir.A09G242400	A09	84773005	84774078	AT1G18790	RWP-RK domain-containing protein
Gohir.A09G242500	A09	84774951	84777354	AT3G47530	Pentatricopeptide repeat (PPR) superfamily protein
Gohir.A09G242600	A09	84779074	84782314	AT1G74460	GDSL-like Lipase/Acylhydrolase superfamily protein
Gohir.A09G242700	A09	84784698	84795386	AT5G07740	actin binding
Gohir.A09G242800	A09	84797111	84804405	AT1G18670	Protein kinase superfamily protein
Gohir.A09G242900	A09	84813289	84815693	AT1G13950	eukaryotic elongation factor 5A-1
Gohir.A09G243000	A09	84818282	84824938	AT5G07830	glucuronidase 2
Gohir.A10G109550	A10	28123715	28129426	AT3G23410	fatty alcohol oxidase 3
Gohir.A10G157222	A10	92760844	92762061	AT4G30770	Putative membrane lipoprotein
Gohir.A11G054300	A11	5390059	5393032	AT5G64780	Uncharacterised conserved protein UCP009193
Gohir.A11G054400	A11	5394760	5396759	AT1G76010	Alba DNA/RNA-binding protein
Gohir.A11G054450	A11	5397082	5398629
Gohir.A11G054500	A11	5402214	5404562	AT1G25270	nodulin MtN21 /EamA-like transporter family protein
Gohir.A11G054550	A11	5406212	5408186
Gohir.A11G054600	A11	5412227	5415700	AT3G27740	carbamoyl phosphate synthetase A
Gohir.A11G054700	A11	5416024	5418478	AT5G09810	actin 7
Gohir.A11G054800	A11	5418808	5421779	AT5G18390	Pentatricopeptide repeat (PPR) superfamily protein
Gohir.A11G054900	A11	5425459	5428647	AT5G09810	actin 7
Gohir.A11G054950	A11	5434994	5435938
Gohir.A11G055000	A11	5444651	5447767	AT5G09810	actin 7
Gohir.A11G055100	A11	5450041	5453233	AT1G49180	protein kinase family protein
Gohir.A11G055200	A11	5453383	5455938	AT1G51650	ATP synthase epsilon chain, mitochondrial
Gohir.A11G055300	A11	5482714	5487122	AT3G51520	diacylglycerol acyltransferase family
Gohir.A11G055400	A11	5489596	5492601	AT3G51520	diacylglycerol acyltransferase family
Gohir.A11G055500	A11	5492817	5495997	AT3G51520	diacylglycerol acyltransferase family
Gohir.A11G055600	A11	5498697	5500753	AT3G51520	diacylglycerol acyltransferase family
Gohir.A11G055700	A11	5508806	5512465	AT3G51520	diacylglycerol acyltransferase family
Gohir.A11G055800	A11	5517274	5518304	AT5G64667	inflorescence deficient in abscission (IDA)-like 2
Gohir.A11G055900	A11	5530583	5532284	AT5G64660	CYS, MET, PRO, and GLY protein 2
Gohir.A11G056000	A11	5561893	5565236	AT3G18660	plant glycogenin-like starch initiation protein 1
Gohir.A11G056100	A11	5575906	5578526	AT5G09760	Plant invertase/pectin methylesterase inhibitor superfamily
Gohir.A11G056200	A11	5579703	5582713	AT1G77120	alcohol dehydrogenase 1
Gohir.A11G056300	A11	5583212	5585570	AT1G77120	alcohol dehydrogenase 1
Gohir.A12G267900	A12	108534929	108540804	AT4G09550	AtGCP3 interacting protein 1
Gohir.A12G267950	A12	108540977	108542067	AT4G02750	Tetratricopeptide repeat (TPR)-like superfamily protein
Gohir.A12G268000	A12	108543465	108548872	AT1G13160	ARM repeat superfamily protein
Gohir.A12G268100	A12	108549951	108554473	AT1G57820	Zinc finger (C3HC4-type RING finger) family protein
Gohir.A12G268200	A12	108558352	108561347	AT1G48630	receptor for activated C kinase 1B
Gohir.A12G268300	A12	108561654	108573301	AT3G18100	myb domain protein 4r1
Gohir.A12G268400	A12	108574193	108576856	AT4G02750	Tetratricopeptide repeat (TPR)-like superfamily protein
Gohir.A12G268450	A12	108577180	108577862
Gohir.A12G268500	A12	108578423	108584539	AT3G18040	MAP kinase 9
Gohir.A12G268600	A12	108592066	108601377	AT1G18160	Protein kinase superfamily protein
Gohir.A12G268700	A12	108601925	108607861	AT1G18190	golgin candidate 2
Gohir.A12G268800	A12	108608426	108612366	AT1G18200	RAB GTPase homolog A6B
Gohir.A12G268900	A12	108627956	108628821	AT1G18210	Calcium-binding EF-hand family protein
Gohir.A12G269000	A12	108647405	108648618	AT1G73620	Pathogenesis-related thaumatin superfamily protein
Gohir.A12G269100	A12	108656708	108659939	AT3G18010	WUSCHEL related homeobox 1
Gohir.A12G269200	A12	108667804	108672763	AT3G18000	S-adenosyl-L-methionine-dependent methyltransferases superfamily protein
Gohir.A12G269300	A12	108706129	108710080	AT1G73590	Auxin efflux carrier family protein
Gohir.A12G269400	A12	108719304	108723398	AT3G17980	Calcium-dependent lipid-binding (CaLB domain) family protein
Gohir.A12G269450	A12	108725271	108728831	AT3G47570	Leucine-rich repeat protein kinase family protein
Gohir.A12G269500	A12	108730851	108733996	AT3G10110	Mitochondrial import inner membrane translocase subunit Tim17/Tim22/Tim23 family protein
Gohir.A12G269600	A12	108735112	108736159	AT3G17950
Gohir.A12G269700	A12	108739194	108740226	AT3G24020	Disease resistance-responsive (dirigent-like protein) family protein
Gohir.A12G269800	A12	108743279	108744194	AT1G18290
Gohir.A12G269900	A12	108747386	108748934	AT4G07950	DNA-directed RNA polymerase, subunit M, archaeal
Gohir.A12G270000	A12	108749992	108758243	AT1G48540	Outer arm dynein light chain 1 protein
Gohir.A12G270100	A12	108808052	108813673	AT3G55130	white-brown complex homolog 19
Gohir.A12G270200	A12	108815098	108820483	AT3G17860	jasmonate-zim-domain protein 3
Gohir.A12G270300	A12	108820990	108829658	AT1G72550	tRNA synthetase beta subunit family protein
Gohir.A12G270400	A12	108830871	108834023	AT1G18300	nudix hydrolase homolog 4
Gohir.A12G270500	A12	108839465	108840003	AT1G67920
Gohir.A12G270600	A12	108840878	108843898	AT2G40540	potassium transporter 2
Gohir.A12G270700	A12	108847364	108848036	AT1G65032
Gohir.A12G270800	A12	108852574	108854748	AT1G14760	KNOX Arabidopsis thaliana meinox
Gohir.A12G270900	A12	108858792	108860200	AT1G73500	MAP kinase kinase 9
Gohir.A12G271000	A12	108874325	108875611	AT5G37490	ARM repeat superfamily protein
Gohir.A12G271050	A12	108878475	108880559	AT1G31930	extra-large GTP-binding protein 3
Gohir.A12G271100	A12	108880560	108883310	AT1G31930	extra-large GTP-binding protein 3
Gohir.A12G271200	A12	108884948	108887240	AT1G48450	Protein of unknown function (DUF760)
Gohir.A12G271250	A12	108887954	108890919	AT3G17790	purple acid phosphatase 17
Gohir.A12G271300	A12	108891678	108897673	AT3G02530	TCP-1/cpn60 chaperonin family protein
Gohir.A12G271400	A12	108900502	108906313	AT5G16560	Homeodomain-like superfamily protein
Gohir.A12G271450	A12	108910768	108920513	AT1G73480	alpha/beta-Hydrolases superfamily protein
Gohir.A12G271500	A12	108921262	108924352	AT1G73220	organic cation/carnitine transporter1
Gohir.A12G271600	A12	108927934	108932428	AT1G73220	organic cation/carnitine transporter1
Gohir.D02G191600	D02	67474546	67483599	AT5G08390	Transducin/WD40 repeat-like superfamily protein
Gohir.D06G151266	D06	55822445	55822958	AT5G26680	5'-3' exonuclease family protein
Gohir.D06G151332	D06	55869906	55870797	AT3G20600	Late embryogenesis abundant (LEA) hydroxyproline-rich glycoprotein family
Gohir.D06G151400	D06	55871320	55872236	AT4G05220	Late embryogenesis abundant (LEA) hydroxyproline-rich glycoprotein family
Gohir.D06G151500	D06	55901443	55904051	AT4G21215
Gohir.D06G151600	D06	55904921	55906831	AT4G21210	PPDK regulatory protein
Gohir.D06G151700	D06	55935497	55936385	AT4G05050	ubiquitin 11
Gohir.D06G151800	D06	55975625	55979592	AT3G62120	Class II aaRS and biotin synthetases superfamily protein
Gohir.D06G151900	D06	55987715	55989171	AT1G11545	xyloglucan endotransglucosylase/hydrolase 8
Gohir.D06G152000	D06	55990428	55993562	AT1G61790	Oligosaccharyltransferase complex/magnesium transporter family protein
Gohir.D06G152101	D06	56036951	56037540	AT4G28556	PAK-box/P21-Rho-binding family protein
Gohir.D06G152201	D06	56039328	56039843
Gohir.D06G152300	D06	56063379	56065663	AT3G20580	COBRA-like protein 10 precursor
Gohir.D07G086200	D07	10921671	10925213	AT2G30890	Cytochrome b561/ferric reductase transmembrane protein family
Gohir.D07G086300	D07	10925428	10929102	AT2G42975
Gohir.D07G086400	D07	10930140	10932585	AT5G50890	alpha/beta-Hydrolases superfamily protein
Gohir.D07G086450	D07	10932678	10933202
Gohir.D07G086500	D07	10941089	10947564	AT3G59090
Gohir.D07G086600	D07	10949928	10958105	AT2G32170	S-adenosyl-L-methionine-dependent methyltransferases superfamily protein
Gohir.D07G086700	D07	10960907	10967264	AT3G22270	Topoisomerase II-associated protein PAT1
Gohir.D07G086800	D07	10969154	10970087	AT2G32210
Gohir.D07G086950	D07	10972754	10973414	AT4G15000	Ribosomal L27e protein family
Gohir.D07G087100	D07	10984635	10989804	AT2G32240
Gohir.D07G087200	D07	11003833	11009456	AT1G10280	Core-2/I-branching beta-1,6-N-acetylglucosaminyltransferase family protein
Gohir.D07G087301	D07	11008133	11015658	AT4G15080	DHHC-type zinc finger family protein
Gohir.D07G087400	D07	11037505	11039539	AT3G22160	VQ motif-containing protein
Gohir.D07G087450	D07	11077764	11080743	AT1G05300	zinc transporter 5 precursor
Gohir.D07G087500	D07	11081013	11085023	AT1G05310	Pectin lyase-like superfamily protein
Gohir.D07G087600	D07	11095015	11098802	AT1G03280	Transcription factor TFIIE, alpha subunit
Gohir.D07G087700	D07	11100461	11102229	AT3G49010	breast basic conserved 1
Gohir.D07G087800	D07	11103069	11105679	AT1G79480	Carbohydrate-binding X8 domain superfamily protein
Gohir.D07G088000	D07	11110687	11111640	AT4G00163
Gohir.D07G088100	D07	11114517	11116618	AT1G62300	WRKY family transcription factor
Gohir.D07G088200	D07	11125135	11129037	AT4G20720	dentin sialophosphoprotein-related
Gohir.D07G088300	D07	11130048	11132162	AT1G05070	Protein of unknown function (DUF1068)
Gohir.D07G088400	D07	11132244	11137481	AT2G32590
Gohir.D07G088500	D07	11153009	11155186	AT5G22355	Cysteine/Histidine-rich C1 domain family protein
Gohir.D07G088533	D07	11177710	11178228	AT2G42550	Protein kinase superfamily protein
Gohir.D07G088566	D07	11191486	11192404	AT2G42550	Protein kinase superfamily protein
Gohir.D07G088600	D07	11199994	11205322	AT2G31340	embryo defective 1381
Gohir.D07G088700	D07	11206221	11208293	AT1G05020	ENTH/ANTH/VHS superfamily protein
Gohir.D07G088800	D07	11218630	11221381	AT4G26840	small ubiquitin-like modifier 1
Gohir.D07G088900	D07	11226589	11229183	AT5G13920	GRF zinc finger / Zinc knuckle protein
Gohir.D07G089000	D07	11227280	11235683	AT2G32970
Gohir.D07G089050	D07	11262601	11264475
Gohir.D07G089100	D07	11280552	11282268	AT3G07820	Pectin lyase-like superfamily protein
Gohir.D07G089200	D07	11320608	11325959	AT2G05760	Xanthine/uracil permease family protein
Gohir.D07G089300	D07	11328898	11336003	AT2G05755	Nodulin MtN21 /EamA-like transporter family protein
Gohir.D07G089401	D07	11338818	11339644	AT4G02070	MUTS homolog 6
Gohir.D07G089500	D07	11345837	11350595	AT2G32990	glycosyl hydrolase 9B8
Gohir.D07G089600	D07	11356238	11359125	AT4G15410	serine/threonine protein phosphatase 2A 55 kDa regulatory subunit B prime gamma
Gohir.D07G089700	D07	11359853	11360801
Gohir.D07G089801	D07	11384803	11390460	AT3G21630	chitin elicitor receptor kinase 1
Gohir.D07G089900	D07	11392954	11394435	AT3G61110	ribosomal protein S27
Gohir.D07G090001	D07	11410772	11411111	AT1G05010	ethylene-forming enzyme
Gohir.D07G090100	D07	11416635	11418153	AT1G05010	ethylene-forming enzyme
Gohir.D10G232300	D10	67137989	67139406
Gohir.D10G232400	D10	67145871	67148545
Gohir.D10G232408	D10	67155939	67156157
Gohir.D10G232416	D10	67157169	67158074
Gohir.D10G232424	D10	67167879	67170579	AT3G47570	Leucine-rich repeat protein kinase family protein
Gohir.D10G232432	D10	67173415	67177774	AT3G47570	Leucine-rich repeat protein kinase family protein
Gohir.D10G232600	D10	67124393	67126325	AT2G39700	expansin A4
Gohir.D10G232608	D10	67128897	67131658
Gohir.D10G232700	D10	67093857	67098103	AT5G13820	telomeric DNA binding protein 1
Gohir.D10G232800	D10	67069237	67072699	AT2G37650	GRAS family transcription factor
Gohir.D10G232900	D10	67066772	67069236	AT5G13840	FIZZY-related 3
Gohir.D10G233000	D10	67062124	67066334	AT3G12380	actin-related protein 5
Gohir.D10G233100	D10	67019759	67020100	AT2G39705	ROTUNDIFOLIA like 8
Gohir.D10G233108	D10	67045615	67046722
Gohir.D10G233116	D10	67060320	67060733	AT5G02220
Gohir.D10G233200	D10	67002300	67005317	AT3G55530	RING/U-box superfamily protein
Gohir.D10G233300	D10	66998743	67001050	AT2G39710	Eukaryotic aspartyl protease family protein
Gohir.D10G233400	D10	66981461	66982874	AT2G39720	RING-H2 finger C2A
Gohir.D10G233500	D10	66964430	66966393	AT3G11430	glycerol-3-phosphate acyltransferase 5
Gohir.D10G233600	D10	66919325	66921008	AT3G21420	2-oxoglutarate (2OG) and Fe(II)-dependent oxygenase superfamily protein
Gohir.D10G233700	D10	66917160	66918281	AT5G02140	Pathogenesis-related thaumatin superfamily protein
Gohir.D10G233800	D10	66913175	66914634
Gohir.D10G233900	D10	66907459	66909999	AT3G55550	Concanavalin A-like lectin protein kinase family protein
Gohir.D10G234000	D10	66894674	66897698	AT2G39730	rubisco activase
Gohir.D10G234100	D10	66879627	66880604	AT5G06080	LOB domain-containing protein 33
Gohir.D10G234200	D10	66870306	66874036	AT3G55560	AT-hook protein of GA feedback 2
Gohir.D10G234300	D10	66859034	66862885	AT2G44920	Tetratricopeptide repeat (TPR)-like superfamily protein
Gohir.D10G234400	D10	66853159	66859791	AT3G11420	Protein of unknown function (DUF604)
Gohir.D10G234500	D10	66837906	66838736	AT5G06070	C2H2 and C2HC zinc fingers superfamily protein
Gohir.D10G234508	D10	66841498	66842010	AT2G37740	zinc-finger protein 10
Gohir.D10G234600	D10	66810138	66812073	AT3G11410	protein phosphatase 2CA
Gohir.D10G234700	D10	66795231	66799069	AT2G39740	Nucleotidyltransferase family protein
Gohir.D10G234800	D10	66787690	66794025	AT2G39750	S-adenosyl-L-methionine-dependent methyltransferases superfamily protein
Gohir.D10G234900	D10	66779215	66783191	AT2G39760	BTB/POZ/MATH-domains containing protein
Gohir.D10G235000	D10	66778761	66779030	AT3G55570
Gohir.D10G235100	D10	66766483	66772439	AT3G55580	Regulator of chromosome condensation (RCC1) family protein
Gohir.D10G235200	D10	66759175	66763461	AT5G02070	Protein kinase family protein
Gohir.D10G235300	D10	66755786	66758389	AT3G11400	eukaryotic translation initiation factor 3G1
Gohir.D10G235400	D10	66737958	66740718	AT2G39770	Glucose-1-phosphate adenylyltransferase family protein
Gohir.D10G235408	D10	66754022	66755155
Gohir.D10G235500	D10	66729481	66732054	AT3G53850	Uncharacterised protein family (UPF0497)
Gohir.D10G235600	D10	66724544	66729037	AT4G33540	metallo-beta-lactamase family protein
Gohir.D10G235800	D10	66691032	66698487	AT3G55610	delta 1-pyrroline-5-carboxylate synthase 2
Gohir.D10G235808	D10	66698570	66701140	AT2G39795	Mitochondrial glycoprotein family protein
Gohir.D10G235816	D10	66708021	66709293	AT1G77450	NAC domain containing protein 32
Gohir.D10G235824	D10	66709670	66717363	AT4G33540	metallo-beta-lactamase family protein
Gohir.D10G235832	D10	66722981	66724238	AT1G77450	NAC domain containing protein 32
Gohir.D10G235900	D10	66684819	66688221	AT2G39805	Integral membrane Yip1 family protein
Gohir.D10G236000	D10	66678755	66679232
Gohir.D10G236100	D10	66675150	66676196	AT4G38040	Exostosin family protein
Gohir.D10G236200	D10	66665627	66668329	AT5G43470	Disease resistance protein (CC-NBS-LRR class) family
Gohir.D10G236300	D10	66628707	66629953	AT5G05970	Transducin/WD40 repeat-like superfamily protein
Gohir.D10G236308	D10	66641930	66644715	AT5G35450	Disease resistance protein (CC-NBS-LRR class) family
Gohir.D10G236500	D10	66579122	66581830	AT5G43470	Disease resistance protein (CC-NBS-LRR class) family
Gohir.D10G236600	D10	66552043	66554823	AT5G43470	Disease resistance protein (CC-NBS-LRR class) family
Gohir.D10G236608	D10	66561665	66565291	AT5G43470	Disease resistance protein (CC-NBS-LRR class) family
Gohir.D10G236616	D10	66567069	66567868	AT5G05970	Transducin/WD40 repeat-like superfamily protein
Gohir.D10G236624	D10	66577874	66578881	AT5G05970	Transducin/WD40 repeat-like superfamily protein
Gohir.D10G236700	D10	66536888	66540279	AT5G43470	Disease resistance protein (CC-NBS-LRR class) family
Gohir.D10G236800	D10	66523175	66525987	AT5G43470	Disease resistance protein (CC-NBS-LRR class) family
Gohir.D10G237000	D10	66482236	66487843	AT5G05970	Transducin/WD40 repeat-like superfamily protein
Gohir.D10G237008	D10	66489564	66497388	AT5G35450	Disease resistance protein (CC-NBS-LRR class) family
Gohir.D10G237016	D10	66503602	66511460	AT5G43470	Disease resistance protein (CC-NBS-LRR class) family
Gohir.D10G237100	D10	66476676	66480288	AT2G39840	type one serine/threonine protein phosphatase 4
Gohir.D10G237200	D10	66460824	66464253	AT2G39830	DA1-related protein 2
Gohir.D10G237300	D10	66455997	66460394	AT3G55640	Mitochondrial substrate carrier family protein
Gohir.D10G237400	D10	66450669	66453431	AT5G43470	Disease resistance protein (CC-NBS-LRR class) family
Gohir.D10G237500	D10	66443811	66445934	AT5G61250	glucuronidase 1
Gohir.D10G237600	D10	66437326	66439902	AT5G02030	POX (plant homeobox) family protein
Gohir.D10G237700	D10	66426121	66427376	AT1G69490	NAC-like, activated by AP3/PI
Gohir.D10G237708	D10	66428048	66428932	AT1G12060	BCL-2-associated athanogene 5
Gohir.D10G237800	D10	66421532	66423165	AT1G07410	RAB GTPase homolog A2B
Gohir.D10G238000	D10	66366719	66370090	AT3G46850	Subtilase family protein
Gohir.D10G238008	D10	66372582	66375994	AT3G46850	Subtilase family protein
Gohir.D10G238016	D10	66377694	66385113	AT3G46850	Subtilase family protein
Gohir.D10G238024	D10	66388233	66392328
Gohir.D10G238032	D10	66397641	66398709	AT5G07830	glucuronidase 2
Gohir.D10G238040	D10	66401214	66402309	AT3G47570	Leucine-rich repeat protein kinase family protein
Gohir.D10G238100	D10	66352014	66357048	AT5G59100	Subtilisin-like serine endopeptidase family protein
Gohir.D10G238200	D10	66341276	66350769	AT5G59100	Subtilisin-like serine endopeptidase family protein
Gohir.D10G238300	D10	66159955	66161634	AT3G53980	Bifunctional inhibitor/lipid-transfer protein/seed storage 2S albumin superfamily protein
Gohir.D10G238308	D10	66161563	66164510	AT1G22370	UDP-glucosyl transferase 85A5
Gohir.D10G238316	D10	66198736	66199494	AT5G05960	Bifunctional inhibitor/lipid-transfer protein/seed storage 2S albumin superfamily protein
Gohir.D10G238324	D10	66202501	66203316	AT5G67265
Gohir.D10G238332	D10	66204314	66205495	AT2G27520	F-box and associated interaction domains-containing protein
Gohir.D10G238340	D10	66223495	66224758	AT4G12560	F-box and associated interaction domains-containing protein
Gohir.D10G238348	D10	66226979	66228913	AT1G07080	Thioredoxin superfamily protein
Gohir.D10G238356	D10	66233322	66234998	AT5G02020
Gohir.D10G238364	D10	66241921	66242814
Gohir.D10G238372	D10	66255097	66257743	AT4G37370	cytochrome P450, family 81, subfamily D, polypeptide 8
Gohir.D10G238380	D10	66263878	66266537	AT4G37370	cytochrome P450, family 81, subfamily D, polypeptide 8
Gohir.D10G238388	D10	66282622	66285047	AT4G37370	cytochrome P450, family 81, subfamily D, polypeptide 8
Gohir.D10G238396	D10	66290745	66292601	AT5G17780	alpha/beta-Hydrolases superfamily protein
Gohir.D10G238400	D10	66159010	66159837	AT5G05950	maternal effect embryo arrest 60
Gohir.D10G238404	D10	66318231	66320060	AT3G45400	exostosin family protein
Gohir.D10G238500	D10	66154696	66157897	AT5G05940	ROP guanine nucleotide exchange factor 5
Gohir.D10G238600	D10	66125470	66128464	AT5G05930	guanylyl cyclase 1
Gohir.D10G238608	D10	66136119	66137354	AT4G12560	F-box and associated interaction domains-containing protein
Gohir.D10G238700	D10	66104653	66107218	AT2G39870
Gohir.D10G238800	D10	66098412	66100010	AT3G55700	UDP-Glycosyltransferase superfamily protein
Gohir.D10G238900	D10	66095557	66097846	AT1G22380	UDP-glucosyl transferase 85A3
Gohir.D10G239000	D10	66091955	66094057	AT1G22400	UDP-Glycosyltransferase superfamily protein
Gohir.D10G239100	D10	66074495	66077572	AT1G22380	UDP-glucosyl transferase 85A3
Gohir.D10G239200	D10	66061405	66063706	AT1G22360	UDP-glucosyl transferase 85A2
Gohir.D10G239300	D10	66050371	66057387	AT1G22400	UDP-Glycosyltransferase superfamily protein
Gohir.D10G239400	D10	66030453	66032797	AT1G22400	UDP-Glycosyltransferase superfamily protein
Gohir.D10G239500	D10	66017706	66020942	AT1G22380	UDP-glucosyl transferase 85A3
Gohir.D10G239700	D10	66008513	66012460	AT1G22380	UDP-glucosyl transferase 85A3
Gohir.D10G239800	D10	66002340	66004782	AT1G22380	UDP-glucosyl transferase 85A3
Gohir.D10G239900	D10	65992457	65994853	AT1G22380	UDP-glucosyl transferase 85A3
Gohir.D10G240000	D10	65986848	65989017	AT1G22360	UDP-glucosyl transferase 85A2
Gohir.D10G240100	D10	65982870	65983517
Gohir.D10G240200	D10	65981795	65982226	AT1G07400	HSP20-like chaperones superfamily protein
Gohir.D10G240300	D10	65973855	65974280	AT3G08880
Gohir.D10G240500	D10	65945567	65947628	AT1G07080	Thioredoxin superfamily protein
Gohir.D10G240508	D10	65950514	65951181
Gohir.D10G240516	D10	65969295	65970778	AT4G12560	F-box and associated interaction domains-containing protein
Gohir.D10G240600	D10	65923352	65925545
Gohir.D10G240608	D10	65940505	65941714	AT3G06240	F-box family protein
Gohir.D10G240616	D10	65942824	65944421	AT3G06240	F-box family protein
Gohir.D10G240800	D10	65908718	65910840	AT5G01580	gamma interferon responsive lysosomal thiol (GILT) reductase family protein
Gohir.D10G240808	D10	65914317	65916549
Gohir.D10G241000	D10	65884103	65885317	AT4G12560	F-box and associated interaction domains-containing protein
Gohir.D10G241008	D10	65897610	65900018	AT4G12560	F-box and associated interaction domains-containing protein
Gohir.D10G241100	D10	65843444	65844655	AT4G12560	F-box and associated interaction domains-containing protein
Gohir.D10G241108	D10	65863570	65864813	AT1G07080	Thioredoxin superfamily protein
Gohir.D10G241200	D10	65802984	65805046	AT1G07080	Thioredoxin superfamily protein
Gohir.D10G241300	D10	65800373	65801602	AT3G06240	F-box family protein
Gohir.D10G241400	D10	65797921	65799132	AT3G06240	F-box family protein
Gohir.D10G241600	D10	65759892	65761100	AT4G12560	F-box and associated interaction domains-containing protein
Gohir.D10G241608	D10	65779310	65781925
Gohir.D10G241700	D10	65753844	65755505	AT4G12560	F-box and associated interaction domains-containing protein
Gohir.D10G241800	D10	65735483	65736353	AT5G05960	Bifunctional inhibitor/lipid-transfer protein/seed storage 2S albumin superfamily protein
Gohir.D10G242000	D10	65718370	65720854	AT5G05830	RING/FYVE/PHD zinc finger superfamily protein
Gohir.D10G242008	D10	65721666	65723862	AT5G05840	Protein of unknown function (DUF620)
Gohir.D10G242100	D10	65711655	65714258	AT3G55730	myb domain protein 109
Gohir.D10G242200	D10	65684312	65685513	AT5G01090	Concanavalin A-like lectin family protein
Gohir.D10G242300	D10	65667579	65671356	AT2G39890	proline transporter 1
Gohir.D10G242400	D10	65663334	65666571	AT1G51740	syntaxin of plants 81
Gohir.D10G242500	D10	65660552	65662631	AT1G74270	Ribosomal protein L35Ae family protein
Gohir.D10G242600	D10	65654166	65657825	AT3G11320	Nucleotide-sugar transporter family protein
Gohir.D10G242700	D10	65650659	65653681	AT3G55770	GATA type zinc finger transcription factor family protein
Gohir.D10G242800	D10	65648229	65649353	AT3G55780	Glycosyl hydrolase superfamily protein
Gohir.D10G242900	D10	65644831	65646845	AT2G39920	HAD superfamily, subfamily IIIB acid phosphatase
Gohir.D10G243000	D10	65637360	65640756	AT3G55800	sedoheptulose-bisphosphatase
Gohir.D10G243100	D10	65636009	65636659	AT2G25770	Polyketide cyclase/dehydrase and lipid transport superfamily protein
Gohir.D10G243200	D10	65629699	65632776	AT2G38080	Laccase/Diphenol oxidase family protein
Gohir.D10G243300	D10	65623874	65626142	AT5G05790	Duplicated homeodomain-like superfamily protein
Gohir.D10G243400	D10	65619103	65621577	AT3G11280	Duplicated homeodomain-like superfamily protein
Gohir.D10G243500	D10	65607376	65611297	AT2G39940	RNI-like superfamily protein
Gohir.D10G243600	D10	65575608	65577289	AT4G10720	Ankyrin repeat family protein
Gohir.D10G243700	D10	65570936	65572719	AT4G10720	Ankyrin repeat family protein
Gohir.D10G243800	D10	65563631	65568962	AT2G39950
Gohir.D10G243900	D10	65556988	65560219	AT2G39960	Microsomal signal peptidase 25 kDa subunit (SPC25)
Gohir.D10G244000	D10	65549737	65554343	AT2G39970	Mitochondrial substrate carrier family protein
Gohir.D10G244100	D10	65547022	65548302	AT1G07310	Calcium-dependent lipid-binding (CaLB domain) family protein
Gohir.D10G244200	D10	65519891	65540952	AT5G17680	disease resistance protein (TIR-NBS-LRR class), putative
Gohir.D10G244208	D10	65522099	65524470	AT5G45250	Disease resistance protein (TIR-NBS-LRR class) family
Gohir.D10G244516	D10	65319980	65327240	AT5G17680	disease resistance protein (TIR-NBS-LRR class), putative
Gohir.D10G244524	D10	65343560	65345225
Gohir.D10G244532	D10	65345496	65360213	AT5G41540	Disease resistance protein (TIR-NBS-LRR class) family
Gohir.D10G244540	D10	65411667	65415675	AT5G17680	disease resistance protein (TIR-NBS-LRR class), putative
Gohir.D10G244548	D10	65445024	65445423	AT5G12080	mechanosensitive channel of small conductance-like 10
Gohir.D10G244556	D10	65446347	65446983	AT3G46960	RNA helicase, ATP-dependent, SK12/DOB1 protein
Gohir.D10G244564	D10	65476251	65481611	AT5G41540	Disease resistance protein (TIR-NBS-LRR class) family
Gohir.D10G244572	D10	65484644	65488706	AT5G17680	disease resistance protein (TIR-NBS-LRR class), putative
Gohir.D10G247200	D10	67199090	67205475	AT5G52530	dentin sialophosphoprotein-related
Gohir.D10G247300	D10	67204755	67211872	AT2G40070
Gohir.D10G247400	D10	67213326	67217549	AT5G05700	arginine-tRNA protein transferase 1
Gohir.D10G247500	D10	67220078	67223757	AT2G40100	light harvesting complex photosystem II
Gohir.D10G247550	D10	67247453	67248285	ATCG01040	Cytochrome C assembly protein
Gohir.D10G247600	D10	67252566	67257487	AT5G05690	Cytochrome P450 superfamily protein
Gohir.D10G247700	D10	67257966	67263638	AT5G05680	nuclear pore complex protein-related
Gohir.D10G247800	D10	67264755	67268566	AT2G40095	Alpha/beta hydrolase related protein
Gohir.D11G105500	D11	9659560	9660571
Gohir.D11G105600	D11	9662989	9665188
Gohir.D11G105700	D11	9668273	9673306
Gohir.D11G105800	D11	9674499	9675574
Gohir.D11G105900	D11	9678387	9681297
Gohir.D11G106000	D11	9729174	9732141
Gohir.D11G106033	D11	9733065	9733903
Gohir.D11G106066	D11	9734503	9734700
Gohir.D11G106100	D11	9741643	9743122
Gohir.D11G106200	D11	9743178	9745513
Gohir.D11G106400	D11	9777566	9783506
Gohir.D11G106500	D11	9783724	9789063
Gohir.D11G106600	D11	9808632	9811199
Gohir.D11G106700	D11	9836491	9837902
Gohir.D11G106800	D11	9843573	9845858
Gohir.D11G106866	D11	9845699	9847940
Gohir.D11G106932	D11	9849729	9852127
Gohir.D11G107000	D11	9854244	9858737
Gohir.D11G107100	D11	9859446	9860517
Gohir.D11G107200	D11	9860839	9862785
Gohir.D11G107300	D11	9863276	9866820
Gohir.D11G107400	D11	9868042	9869749
Gohir.D11G107500	D11	9870608	9873916
Gohir.D11G107533	D11	9875430	9878777
Gohir.D11G107566	D11	9878911	9879382
Gohir.D11G107600	D11	9899246	9902227
Gohir.D11G107700	D11	9902228	9904689
Gohir.D11G107733	D11	9903057	9903927
Gohir.D11G107766	D11	9905352	9908838
Gohir.D11G107800	D11	9910338	9925051
Gohir.D11G107900	D11	9954435	9962037
Gohir.D11G108000	D11	9969742	9979088
Gohir.D11G108100	D11	9979713	9986443
Gohir.D11G108200	D11	10021486	10025610
Gohir.D11G108700	D11	10026099	10029953
Gohir.D11G108801	D11	10030918	10033114
Gohir.D11G108900	D11	10035692	10037472
Gohir.D11G109000	D11	10041706	10043428
Gohir.D12G096933	D12	37403752	37404972
Gohir.D12G096966	D12	37406103	37409172	AT5G13450	delta subunit of Mt ATP synthase
Gohir.D12G097000	D12	37463842	37469387	AT5G09680	reduced lateral root formation
Gohir.D12G097050	D12	37466059	37466292
Gohir.D12G097100	D12	37573961	37574369	AT2G45180	Bifunctional inhibitor/lipid-transfer protein/seed storage 2S albumin superfamily protein
Gohir.D12G097200	D12	37575978	37578938	AT3G60660
Gohir.D12G097250	D12	37581542	37583140
Gohir.D12G097300	D12	37608736	37611517	AT4G00150	GRAS family transcription factor
Gohir.D12G097400	D12	37621172	37623103	AT4G00150	GRAS family transcription factor
Gohir.D12G097500	D12	37714346	37717830	AT2G45140	plant VAP homolog 12
Gohir.D12G097601	D12	37719683	37724810	AT2G45130	SPX domain gene 3
Gohir.D12G097700	D12	37726919	37729159	AT1G12244	Polynucleotidyl transferase, ribonuclease H-like superfamily protein
Gohir.D12G097800	D12	37769478	37770733	AT3G60580	C2H2-like zinc finger protein
Gohir.D12G097900	D12	37779716	37781678	AT1G02040	C2H2-type zinc finger family protein
Gohir.D12G097950	D12	37817540	37819053	AT1G65680	expansin B2
Gohir.D12G098000	D12	37845294	37847300	AT3G60550	cyclin p3;2
Gohir.D12G098100	D12	37859668	37863156	AT4G00050	basic helix-loop-helix (bHLH) DNA-binding superfamily protein
Gohir.D12G098200	D12	37864776	37866738	AT5G07670	RNI-like superfamily protein
Gohir.D12G098300	D12	37867110	37883985	AT1G02080	transcription regulators
Gohir.D12G098350	D12	37901281	37901593
Gohir.D12G098400	D12	37918843	37919852	AT1G02070
Gohir.D12G098450	D12	37930653	37930874
Gohir.D12G098500	D12	37931615	37932130	AT4G27090	Ribosomal protein L14
Gohir.D12G098600	D12	37934577	37937244	AT1G27370	squamosa promoter binding protein-like 10
Gohir.D12G098650	D12	37941674	37942404
Gohir.D12G098700	D12	38001613	38003993	AT1G02065	squamosa promoter binding protein-like 8
Gohir.D12G098800	D12	38015191	38017147	AT1G04410	Lactate/malate dehydrogenase family protein
Gohir.D12G098900	D12	38018570	38021576	AT2G44990	carotenoid cleavage dioxygenase 7
Gohir.D12G099100	D12	38129144	38133608	AT4G31700	ribosomal protein S6
Gohir.D12G099200	D12	38153193	38156557	AT3G60390	homeobox-leucine zipper protein 3
Gohir.D12G099300	D12	38156767	38159133	AT4G01710	ARP2/3 complex 16 kDa subunit (p16-Arc)
Gohir.D12G099333	D12	38163987	38166284	AT4G28050	tetraspanin7
Gohir.D12G099366	D12	38168724	38172093	AT2G44900	ARABIDILLO-1
Gohir.D12G099400	D12	38172329	38175607	AT3G60340	alpha/beta-Hydrolases superfamily protein
Gohir.D12G099500	D12	38189924	38190493	AT2G44840	ethylene-responsive element binding factor 13
Gohir.D12G099600	D12	38195889	38196707	AT2G44840	ethylene-responsive element binding factor 13
Gohir.D12G099700	D12	38200081	38200913	AT2G44840	ethylene-responsive element binding factor 13
Gohir.D12G099800	D12	38219116	38223613	AT1G02090	Proteasome component (PCI) domain protein
Gohir.D12G099900	D12	38232600	38241347	AT1G02120	GRAM domain family protein
Gohir.D12G100000	D12	38259200	38260489	AT2G44810	alpha/beta-Hydrolases superfamily protein
Gohir.D12G100100	D12	38299478	38300755	AT2G44810	alpha/beta-Hydrolases superfamily protein
Gohir.D12G100200	D12	38322024	38325143	AT3G60300	RWD domain-containing protein
Gohir.D12G100300	D12	38330438	38332230	AT2G44800	2-oxoglutarate (2OG) and Fe(II)-dependent oxygenase superfamily protein
Gohir.D12G100366	D12	38332768	38333802
Gohir.D12G100432	D12	38344807	38354094	AT4G24810	Protein kinase superfamily protein
Gohir.D12G100500	D12	38382220	38383732	AT4G09320	Nucleoside diphosphate kinase family protein
Gohir.D12G100600	D12	38384322	38386847	AT2G44760	Domain of unknown function (DUF3598)
Gohir.D12G100700	D12	38392957	38395933	AT2G44745	WRKY family transcription factor
Gohir.D12G100800	D12	38411149	38412558	AT2G44740	cyclin p4;1
Gohir.D12G100900	D12	38414973	38415790	AT5G51160	Ankyrin repeat family protein
Gohir.D12G101000	D12	38457180	38457892	AT5G51160	Ankyrin repeat family protein
Gohir.D12G101050	D12	38461824	38464609
Gohir.D12G101100	D12	38492802	38493788	AT5G51160	Ankyrin repeat family protein
Gohir.D12G101200	D12	38520378	38521137	AT5G51160	Ankyrin repeat family protein
Gohir.D12G101250	D12	38522976	38524568	AT5G51160	Ankyrin repeat family protein
Gohir.D12G101300	D12	38538218	38540318	AT1G28710	Nucleotide-diphospho-sugar transferase family protein
Gohir.D12G101400	D12	38541287	38547081	AT1G02160	Cox19 family protein (CHCH motif)
Gohir.D12G101500	D12	38547118	38549625	AT5G24910	cytochrome P450, family 714, subfamily A, polypeptide 1
Gohir.D12G101600	D12	38549203	38553416	AT2G44680	casein kinase II beta subunit 4
Gohir.D12G101700	D12	38554684	38556777	AT4G17080	Histone H3 K4-specific methyltransferase SET7/9 family protein
Gohir.D12G101750	D12	38557555	38558772	AT1G68030	RING/FYVE/PHD zinc finger superfamily protein
Gohir.D12G101800	D12	38565794	38573392	AT3G60240
Gohir.D12G101900	D12	38573723	38576860	AT5G01110	Tetratricopeptide repeat (TPR)-like superfamily protein
Gohir.D12G102000	D12	38626325	38633762	AT3G60240
Gohir.D12G102100	D12	38644378	38645472	AT3G60220	TOXICOS EN LEVADURA 4
Gohir.D12G102200	D12	38645842	38649219	AT2G44640
Gohir.D12G102300	D12	38651876	38654138	AT2G44610	Ras-related small GTP-binding family protein
Gohir.D12G102400	D12	38654830	38657237	AT1G44750	purine permease 11
Gohir.D12G102500	D12	38665830	38667442	AT2G44600
Gohir.D12G102600	D12	38671123	38673652	AT1G05580	cation/H+ exchanger 23
Gohir.D12G102700	D12	38690947	38693710	AT2G13620	cation/hydrogen exchanger 15
Gohir.D12G102800	D12	38752418	38755380	AT2G13620	cation/hydrogen exchanger 15
Gohir.D12G102900	D12	38755936	38759089	AT5G13800	pheophytinase
Gohir.D12G103000	D12	38760300	38769154	AT3G63460	transducin family protein / WD-40 repeat family protein
Gohir.D12G103200	D12	38772810	38773834	AT5G04710	Zn-dependent exopeptidases superfamily protein
Gohir.D12G103300	D12	38787006	38789863	AT2G28420	Lactoylglutathione lyase / glyoxalase I family protein
Gohir.D12G103400	D12	38788977	38794603	AT5G13790	AGAMOUS-like 15
Gohir.D12G103450	D12	38816056	38819205	AT3G63470	serine carboxypeptidase-like 40
Gohir.D12G103501	D12	38820232	38824413	AT3G14470	NB-ARC domain-containing disease resistance protein
Gohir.D12G103551	D12	38825879	38827757	AT3G52040
Gohir.D12G103600	D12	38862799	38867197	AT3G24090	glutamine-fructose-6-phosphate transaminase (isomerizing)s;sugar binding;transaminases
Gohir.D12G103700	D12	38874111	38877946	AT4G00165	Bifunctional inhibitor/lipid-transfer protein/seed storage 2S albumin superfamily protein
Gohir.D12G103800	D12	38886186	38889586	AT4G00170	Plant VAMP (vesicle-associated membrane protein) family protein
Gohir.D12G103900	D12	38894646	38895203	AT5G19990	regulatory particle triple-A ATPase 6A
Gohir.D12G103950	D12	38895613	38896122
Gohir.D12G104000	D12	38965372	38965866	AT2G45210	SAUR-like auxin-responsive protein family
Gohir.D12G104100	D12	38990334	38992621	AT3G60730	Plant invertase/pectin methylesterase inhibitor superfamily
Gohir.D12G104200	D12	38993814	38998827	AT2G45240	methionine aminopeptidase 1A
Gohir.D12G104400	D12	39019596	39023546	AT2G45290	Transketolase
Gohir.D12G104500	D12	39024355	39028021	AT2G45300	RNA 3'-terminal phosphate cyclase/enolpyruvate transferase, alpha/beta
Gohir.D12G104550	D12	39031916	39035551	AT2G45300	RNA 3'-terminal phosphate cyclase/enolpyruvate transferase, alpha/beta
Gohir.D12G104600	D12	39050167	39051308	AT2G45360	Protein of unknown function (DUF1442)
Gohir.D12G104700	D12	39066567	39067526	AT5G62280	Protein of unknown function (DUF1442)
Gohir.D12G104800	D12	39075423	39077914	AT3G60800	DHHC-type zinc finger family protein
Gohir.D12G104900	D12	39079333	39082566	AT2G02390	glutathione S-transferase zeta 1
Gohir.D12G105000	D12	39082842	39085274	AT4G00210	LOB domain-containing protein 31
Gohir.D12G105100	D12	39116323	39117994	AT2G45420	LOB domain-containing protein 18
Gohir.D12G105200	D12	39121669	39124802	AT2G45440	dihydrodipicolinate synthase
Gohir.D12G105300	D12	39126066	39126693	AT3G60890	protein binding
Gohir.D12G105400	D12	39132690	39138403	AT2G45460	SMAD/FHA domain-containing protein
Gohir.D12G105500	D12	39141222	39144098	AT1G12450	SNARE associated Golgi protein family
Gohir.D12G105600	D12	39145639	39147398	AT2G45470	FASCICLIN-like arabinogalactan protein 8
Gohir.D12G105650	D12	39159134	39159304
Gohir.D12G105700	D12	39172614	39179657	AT3G61050	Calcium-dependent lipid-binding (CaLB domain) family protein
Gohir.D12G105800	D12	39184968	39189269	AT2G45620	Nucleotidyltransferase family protein
Gohir.D12G105900	D12	39203399	39208625	AT2G45660	AGAMOUS-like 20
Gohir.D12G106000	D12	39214194	39219082	AT2G45670	calcineurin B subunit-related
Gohir.D12G106100	D12	39258112	39260993	AT1G01900	subtilase family protein
Gohir.D12G106200	D12	39267275	39269757	AT1G01900	subtilase family protein
Gohir.D12G106300	D12	39272452	39276026	AT1G01900	subtilase family protein
Gohir.D12G106400	D12	39294597	39299076	AT2G42010	phospholipase D beta 1
Gohir.D12G106466	D12	39302571	39303002
Gohir.D12G106532	D12	39303719	39306682	AT5G01520	RING/U-box superfamily protein
Gohir.D12G106600	D12	39326994	39330596	AT1G01910	P-loop containing nucleoside triphosphate hydrolases superfamily protein
Gohir.D12G106700	D12	39332566	39339363	AT4G22990	Major Facilitator Superfamily with SPX (SYG1/Pho81/XPR1) domain-containing protein
Gohir.D12G106750	D12	39357449	39358185	AT3G52790	peptidoglycan-binding LysM domain-containing protein
Gohir.D12G106800	D12	39358739	39362242	AT5G35730	EXS (ERD1/XPR1/SYG1) family protein
Gohir.D12G106900	D12	39390504	39394455	AT4G23010	UDP-galactose transporter 2
Gohir.D12G107000	D12	39447372	39450748	AT4G12110	sterol-4alpha-methyl oxidase 1-1
Gohir.D12G107100	D12	39503368	39506909	AT4G12110	sterol-4alpha-methyl oxidase 1-1
Gohir.D12G107150	D12	39532907	39537207	AT3G16857	response regulator 1
Gohir.D12G107200	D12	39538139	39539876	AT4G10160	RING/U-box superfamily protein
Gohir.D12G107300	D12	39545911	39546792	AT5G19790	related to AP2 11
Gohir.D12G107350	D12	39590199	39591848	AT2G45720	ARM repeat superfamily protein
Gohir.D12G107400	D12	39596298	39598426	AT3G61060	phloem protein 2-A13
Gohir.D12G107500	D12	39635506	39639129	AT3G61140	26S proteasome, regulatory subunit Rpn7;Proteasome component (PCI) domain
Gohir.D12G107600	D12	39664628	39665747	ATCG00670	plastid-encoded CLP P
Gohir.D12G107700	D12	39666040	39666180	ATCG00065	ribosomal protein S12A
Gohir.D12G107900	D12	39667383	39667783	ATCG00650	ribosomal protein S18
Gohir.D12G108000	D12	39668132	39668515	ATCG00640	ribosomal protein L33
Gohir.D12G108100	D12	39668829	39668957	ATCG00630	PSAJ
Gohir.D12G108200	D12	39732083	39737042	AT4G00730	Homeobox-leucine zipper family protein / lipid-binding START domain-containing protein
Gohir.D12G108300	D12	39771702	39772488	AT2G45760	BON association protein 2
Gohir.D12G108400	D12	39775698	39776414	AT2G45760	BON association protein 2
Gohir.D12G108450	D12	39780590	39782532	AT5G11510	myb domain protein 3r-4
Gohir.D12G108500	D12	39786647	39789611	AT1G63780	Ribosomal RNA processing Brix domain protein
Gohir.D12G108600	D12	39792346	39794351	AT4G00550	digalactosyl diacylglycerol deficient 2
Gohir.D12G108700	D12	39797886	39800541	AT3G57000	nucleolar essential protein-related
Gohir.D12G108750	D12	39801591	39805232	AT2G24190	NAD(P)-binding Rossmann-fold superfamily protein
Gohir.D12G108800	D12	39808817	39811935	AT2G45790	phosphomannomutase
Gohir.D12G108900	D12	39812748	39822407	AT4G00630	K+ efflux antiporter 2
Gohir.D12G109000	D12	39838087	39839610	AT1G01780	GATA type zinc finger transcription factor family protein
Gohir.D12G109100	D12	39840499	39845148	AT2G38040	acetyl Co-enzyme a carboxylase carboxyltransferase alpha subunit
Gohir.D12G109200	D12	39847337	39851166	AT3G61260	Remorin family protein
Gohir.D12G109300	D12	39855476	39858357	AT1G01760	adenosine deaminases;RNA binding;RNA binding;adenosine deaminases
Gohir.D12G109400	D12	39873090	39877625	AT5G23850	Arabidopsis thaliana protein of unknown function (DUF821)
Gohir.D12G109500	D12	39878939	39879938	AT5G24090	chitinase A
Gohir.D12G109600	D12	39880505	39881419
Gohir.D12G109633	D12	39886256	39886360
Gohir.D12G109666	D12	39889619	39889774
Gohir.D12G109700	D12	39904175	39904739
Gohir.D12G109750	D12	39926181	39926956
Gohir.D12G109800	D12	39931691	39932266
Gohir.D12G109900	D12	39950195	39951131
Gohir.D12G109950	D12	39960721	39962382	AT3G12580	heat shock protein 70
Gohir.D12G110000	D12	40001802	40009074	AT2G46180	golgin candidate 4
Gohir.D12G110100	D12	40010303	40011118	AT3G61550	RING/U-box superfamily protein
Gohir.D12G110200	D12	40024014	40026287	AT3G61520	Pentatricopeptide repeat (PPR) superfamily protein
Gohir.D12G110300	D12	40034965	40038313	AT3G61510	ACC synthase 1
Gohir.D12G110400	D12	40067547	40069539	AT1G01490	Heavy metal transport/detoxification superfamily protein
Gohir.D12G110600	D12	40090589	40093355	AT1G01540	Protein kinase superfamily protein
Gohir.D12G110700	D12	40117121	40119760	AT2G46080
Gohir.D12G110800	D12	40121086	40125894	AT4G01370	MAP kinase 4
Gohir.D12G110900	D12	40126826	40130597	AT2G22590	UDP-Glycosyltransferase superfamily protein
Gohir.D12G111000	D12	40130598	40134723	AT4G00290	Mechanosensitive ion channel protein
Gohir.D12G111100	D12	40151069	40157556	AT5G41460	Protein of unknown function (DUF604)
Gohir.D12G111200	D12	40183430	40184851	AT4G00300	fringe-related protein
Gohir.D12G111300	D12	40189284	40190229	AT3G61460	brassinosteroid-responsive RING-H2
Gohir.D12G111400	D12	40193886	40196468	AT4G00340	receptor-like protein kinase 4
Gohir.D12G111500	D12	40214407	40220327	AT4G00350	MATE efflux family protein
Gohir.D12G111550	D12	40221484	40225379
Gohir.D12G111600	D12	40299717	40307674	AT2G46040	ARID/BRIGHT DNA-binding domain;ELM2 domain protein
Gohir.D12G111650	D12	40352178	40354461	AT1G02120	GRAM domain family protein
Gohir.D12G111700	D12	40400927	40411726	AT2G46020	transcription regulatory protein SNF2, putative
Gohir.D12G111800	D12	40440991	40448355
Gohir.D12G111900	D12	40468263	40477306	AT4G00450	RNA polymerase II transcription mediators
Gohir.D12G112000	D12	40477643	40481987	AT4G00460	RHO guanyl-nucleotide exchange factor 3
Gohir.D12G112100	D12	40484230	40487056	AT4G00467	Calcium-dependent lipid-binding (CaLB domain) family protein
Gohir.D12G112200	D12	40488106	40490034	AT3G01580	Tetratricopeptide repeat (TPR)-like superfamily protein
Gohir.D12G112300	D12	40493799	40496246	AT3G61350	SKP1 interacting partner 4
Gohir.D12G112400	D12	40504109	40507527	AT3G58760	Integrin-linked protein kinase family
Gohir.D12G112466	D12	40509551	40510469	AT2G18300	basic helix-loop-helix (bHLH) DNA-binding superfamily protein
Gohir.D12G112532	D12	40510614	40512501	AT2G18300	basic helix-loop-helix (bHLH) DNA-binding superfamily protein
Gohir.D12G112600	D12	40517788	40521784	AT4G00710	BR-signaling kinase 3
Gohir.D12G112700	D12	40528074	40531218	AT2G45850	AT hook motif DNA-binding family protein
Gohir.D12G112800	D12	40547181	40547744
Gohir.D12G112833	D12	40551055	40552835	AT1G16030	heat shock protein 70B
Gohir.D12G112866	D12	40554651	40554959
Gohir.D12G112900	D12	40565840	40568220	AT2G46210	Fatty acid/sphingolipid desaturase
Gohir.D12G113000	D12	40569171	40572337	AT2G46225	ABI-1-like 1
Gohir.D12G113100	D12	40573832	40575257	AT4G01200	Calcium-dependent lipid-binding (CaLB domain) family protein
Gohir.D12G113200	D12	40577000	40585285	AT1G01460	Phosphatidylinositol-4-phosphate 5-kinase, core
Gohir.D12G113300	D12	40598114	40602022	AT3G61600	POZ/BTB containin G-protein 1
Gohir.D12G113400	D12	40604756	40605612	AT2G04520	Nucleic acid-binding, OB-fold-like protein
Gohir.D12G113500	D12	40609323	40610896	AT4G23720	Protein of unknown function (DUF1191)
Gohir.D12G113600	D12	40625326	40630280	AT2G46270	G-box binding factor 3
Gohir.D12G113800	D12	40650348	40651586	AT2G46300	Late embryogenesis abundant (LEA) hydroxyproline-rich glycoprotein family
Gohir.D12G113900	D12	40667509	40668258	AT2G46310	cytokinin response factor 5
Gohir.D12G114000	D12	40669965	40672405	AT3G61640	arabinogalactan protein 20
Gohir.D12G114100	D12	40674244	40679017	AT3G61650	gamma-tubulin
Gohir.D12G114200	D12	40684221	40686320	AT5G41760	Nucleotide-sugar transporter family protein
Gohir.D12G114300	D12	40687483	40691753	AT4G01100	adenine nucleotide transporter 1
Gohir.D12G114350	D12	40709589	40711690	AT3G42170	BED zinc finger ;hAT family dimerisation domain
Gohir.D12G114400	D12	40737255	40741648	AT3G61670	Protein of unknown function (DUF3133)
Gohir.D12G114500	D12	40748926	40753724	AT1G01430	TRICHOME BIREFRINGENCE-LIKE 25
Gohir.D12G114600	D12	40775416	40777137	AT4G01070	UDP-Glycosyltransferase superfamily protein
Gohir.D12G114700	D12	40832107	40835904	AT4G01050	thylakoid rhodanese-like
Gohir.D12G114800	D12	40837702	40841437	AT4G01040	Glycosyl hydrolase superfamily protein
Gohir.D12G114900	D12	40842960	40856233	AT3G61680	alpha/beta-Hydrolases superfamily protein
Gohir.D12G114950	D12	40862036	40862771
Gohir.D12G115000	D12	40865827	40874219	AT3G61690	nucleotidyltransferases
Gohir.D12G115050	D12	40897107	40900532
Gohir.D12G115100	D12	40956387	40961966	AT2G46420	Plant protein 1589 of unknown function
Gohir.D12G115200	D12	40982542	40986881
Gohir.D12G115301	D12	41012184	41018066	AT5G53130	cyclic nucleotide gated channel 1
Gohir.D12G115400	D12	41019230	41022530	AT4G01000	Ubiquitin-like superfamily protein
Gohir.D12G115500	D12	41021420	41025510	AT2G46495	RING/U-box superfamily protein
Gohir.D12G115600	D12	41027364	41035426	AT3G61740	SET domain protein 14
Gohir.D12G115700	D12	41063711	41077526	AT1G01320	Tetratricopeptide repeat (TPR)-like superfamily protein
Gohir.D12G115800	D12	41077439	41079451	AT3G61750	Cytochrome b561/ferric reductase transmembrane with DOMON related domain
Gohir.D12G115850	D12	41081182	41082266
Gohir.D12G115900	D12	41104277	41106349	AT2G46500	phosphoinositide 4-kinase gamma 4
Gohir.D12G116000	D12	41107014	41112372	AT3G61790	Protein with RING/U-box and TRAF-like domains
Gohir.D12G116100	D12	41180826	41182796	AT1G01300	Eukaryotic aspartyl protease family protein
Gohir.D12G116200	D12	41191785	41193952	AT1G01280	cytochrome P450, family 703, subfamily A, polypeptide 2
Gohir.D12G116300	D12	41195755	41196751
Gohir.D12G116350	D12	41202485	41203316	ATCG00590	electron carriers
Gohir.D12G116400	D12	41252077	41252631	AT1G01250	Integrase-type DNA-binding superfamily protein
Gohir.D12G116450	D12	41260689	41261087
Gohir.D12G116500	D12	41309892	41313959	AT3G61830	auxin response factor 18
Gohir.D12G116600	D12	41327878	41329840	AT4G27810
Gohir.D12G116700	D12	41329962	41332070	AT2G46540
Gohir.D12G116800	D12	41341979	41344311	AT2G46570	laccase 6
Gohir.D12G116900	D12	41383389	41384840	AT3G13540	myb domain protein 5
Gohir.D12G117000	D12	41408566	41410222	AT3G61850	Dof-type zinc finger DNA-binding family protein
Gohir.D12G117100	D12	41412750	41415132	AT1G01230	ORMDL family protein
Gohir.D12G117200	D12	41415793	41420164	AT1G01220	L-fucokinase/GDP-L-fucose pyrophosphorylase
Gohir.D12G117300	D12	41423120	41423491	AT2G46600	Calcium-binding EF-hand family protein
Gohir.D12G117400	D12	41423603	41426039	AT3G61860	RNA-binding (RRM/RBD/RNP motifs) family protein
Gohir.D12G117500	D12	41427283	41429694	AT5G08510	Pentatricopeptide repeat (PPR) superfamily protein
Gohir.D12G117600	D12	41429833	41431447	AT4G00895	ATPase, F1 complex, OSCP/delta subunit protein
Gohir.D12G117700	D12	41473547	41475657	AT2G46660	cytochrome P450, family 78, subfamily A, polypeptide 6
Gohir.D12G117800	D12	41482911	41484257	AT5G53560	cytochrome B5 isoform E
Gohir.D12G117900	D12	41518115	41518721
Gohir.D12G118000	D12	41518811	41521200	AT4G22290	Ubiquitin-specific protease family C19-related protein
Gohir.D12G118100	D12	41525060	41526378	AT2G46680	homeobox 7
Gohir.D12G118300	D12	41581652	41582014	AT2G46690	SAUR-like auxin-responsive protein family
Gohir.D12G118500	D12	41598961	41601823	AT3G57000	nucleolar essential protein-related
Gohir.D12G118600	D12	41602623	41604649	AT1G50920	Nucleolar GTP-binding protein
Gohir.D12G118700	D12	41610663	41612955	AT2G46710	Rho GTPase activating protein with PAK-box/P21-Rho-binding domain
Gohir.D12G118800	D12	41612962	41613858	AT5G24090	chitinase A
Gohir.D12G118901	D12	41622135	41624532
Gohir.D12G119000	D12	41682487	41684404	AT4G00870	basic helix-loop-helix (bHLH) DNA-binding superfamily protein
Gohir.D12G201900	D12	55716487	55718590	AT4G25270	Tetratricopeptide repeat (TPR)-like superfamily protein
Gohir.D12G201966	D12	55718852	55722936	AT4G25280	P-loop containing nucleoside triphosphate hydrolases superfamily protein
Gohir.D12G202032	D12	55726916	55727224
Gohir.D12G202100	D12	55730210	55733403	AT5G05850	plant intracellular ras group-related LRR 1
Gohir.D12G202200	D12	55734471	55738227	AT1G23280	MAK16 protein-related
Gohir.D12G202300	D12	55739982	55744144	AT5G50170	C2 calcium/lipid-binding and GRAM domain containing protein
Gohir.D12G202400	D12	55745443	55747218	AT5G63135
Gohir.D12G202500	D12	55747695	55749695	AT1G15530	Concanavalin A-like lectin protein kinase family protein
Gohir.D12G202600	D12	55752681	55756830	AT3G48080	alpha/beta-Hydrolases superfamily protein
Gohir.D12G202700	D12	55755401	55760431	AT3G45900	Ribonuclease P protein subunit P38-related
Gohir.D12G202800	D12	55762492	55764345	AT2G35615	Eukaryotic aspartyl protease family protein
Gohir.D12G202900	D12	55766753	55768222	AT4G19460	UDP-Glycosyltransferase superfamily protein
Gohir.D12G203100	D12	55778204	55782274	AT1G08400	RINT-1 / TIP-1 family
Gohir.D12G203200	D12	55786583	55789314	AT4G19440	Tetratricopeptide repeat (TPR)-like superfamily protein
Gohir.D12G203250	D12	55789506	55789835
Gohir.D12G203300	D12	55790519	55791904	AT1G31490	HXXXD-type acyl-transferase family protein
Gohir.D12G203400	D12	55792993	55800645	AT1G31500	DNAse I-like superfamily protein
Gohir.D12G203500	D12	55805164	55812002	AT5G45300	beta-amylase 2
Gohir.D12G203600	D12	55811440	55815450	AT1G31600	RNA-binding (RRM/RBD/RNP motifs) family protein
Gohir.D12G203700	D12	55830944	55831564	AT5G45320
Gohir.D12G203800	D12	55833067	55834403	AT1G31720	Protein of unknown function (DUF1218)
Gohir.D12G203900	D12	55839519	55847411	AT1G31730	Adaptin family protein
Gohir.D12G204000	D12	55848897	55852664	AT4G19350	embryo defective 3006
Gohir.D12G204100	D12	55856650	55859158	AT4G19230	cytochrome P450, family 707, subfamily A, polypeptide 1
Gohir.D12G204200	D12	55880069	55886686	AT2G35610	xyloglucanase 113
Gohir.D12G204300	D12	55886973	55891019	AT4G19220	Tetratricopeptide repeat (TPR)-like superfamily protein
Gohir.D12G204400	D12	55894213	55894778
Gohir.D12G204500	D12	55905084	55908686	AT5G45360	F-box family protein
Gohir.D12G204600	D12	55912212	55915778	AT1G31770	ATP-binding cassette 14
Gohir.D12G204700	D12	55955424	55958875	AT4G19185	nodulin MtN21 /EamA-like transporter family protein
Gohir.D12G204800	D12	55959722	55965884	AT4G19180	GDA1/CD39 nucleoside phosphatase family protein
Gohir.D12G204900	D12	55975722	55981180	AT4G19170	nine-cis-epoxycarotenoid dioxygenase 4
Gohir.D12G205000	D12	55982051	55987048	AT4G20325
Gohir.D12G205100	D12	55987499	55991905	AT4G19160
Gohir.D12G205200	D12	55999948	56003269
Gohir.D12G205300	D12	56009054	56010177	AT4G27890	HSP20-like chaperones superfamily protein
Gohir.D12G205400	D12	56013004	56016811	AT5G45400	Replication factor-A protein 1-related
Gohir.D12G205500	D12	56017207	56019999	AT5G45410
Gohir.D12G205600	D12	56025012	56029522	AT4G19120	S-adenosyl-L-methionine-dependent methyltransferases superfamily protein
Gohir.D12G205700	D12	56031431	56031556
Gohir.D12G205800	D12	56031983	56035851	AT4G19110	Protein kinase superfamily protein
Gohir.D12G205900	D12	56036213	56041580	AT1G31880	DZC (Disease resistance/zinc finger/chromosome condensation-like region) domain containing protein
Gohir.D12G206000	D12	56048573	56050162
Gohir.D12G206014	D12	56058546	56061881	AT5G20710	beta-galactosidase 7
Gohir.D12G206028	D12	56062937	56063740	AT5G53400	HSP20-like chaperones superfamily protein
Gohir.D12G206042	D12	56064794	56066126	AT4G19060	P-loop containing nucleoside triphosphate hydrolases superfamily protein
Gohir.D12G206056	D12	56098962	56100108	AT2G45330	RNA 2'-phosphotransferase, Tpt1 / KptA family
Gohir.D12G206070	D12	56100313	56100603
Gohir.D12G206084	D12	56101114	56102416	AT4G38650	Glycosyl hydrolase family 10 protein
Gohir.D12G206100	D12	56103829	56106285	AT5G45500	RNI-like superfamily protein
Gohir.D12G206200	D12	56107609	56110757	AT5G45530	Protein of unknown function (DUF594)
Gohir.D12G206300	D12	56111488	56117795	AT4G19050	NB-ARC domain-containing disease resistance protein
Gohir.D12G206400	D12	56118391	56123536	AT5G45550	Mob1/phocein family protein
Gohir.D12G206500	D12	56127686	56137877	AT4G19040	ENHANCED DISEASE RESISTANCE 2
Gohir.D12G206600	D12	56138030	56139568	AT2G15480	UDP-glucosyl transferase 73B5
Gohir.D12G206633	D12	56141094	56142973	AT5G45580	Homeodomain-like superfamily protein
Gohir.D12G206666	D12	56144717	56145047	AT5G46030
Gohir.D12G206700	D12	56148058	56149827
Gohir.D12G206800	D12	56159679	56166092	AT1G32090	early-responsive to dehydration stress protein (ERD4)
Gohir.D12G206900	D12	56169079	56171216	AT2G35550	basic pentacysteine 7
Gohir.D12G207000	D12	56171571	56174213	AT1G32060	phosphoribulokinase
Gohir.D12G207100	D12	56175998	56177826	AT1G33720	cytochrome P450, family 76, subfamily C, polypeptide 6
Gohir.D12G207200	D12	56177827	56181024	AT2G45550	cytochrome P450, family 76, subfamily C, polypeptide 4
Gohir.D12G207300	D12	56204412	56207216	AT3G07040	NB-ARC domain-containing disease resistance protein
Gohir.D12G207400	D12	56207238	56213113	AT5G45610	protein dimerizations
Gohir.D12G207500	D12	56223835	56225583	AT4G19060	P-loop containing nucleoside triphosphate hydrolases superfamily protein
Gohir.D12G207600	D12	56235342	56237971	AT5G45470	Protein of unknown function (DUF594)
Gohir.D12G207650	D12	56258258	56260711	AT5G45530	Protein of unknown function (DUF594)
Gohir.D12G207700	D12	56266986	56273495	AT1G31930	extra-large GTP-binding protein 3
Gohir.D12G207800	D12	56282591	56288984	AT1G31910	GHMP kinase family protein
Gohir.D12G207900	D12	56300517	56305022	AT1G60560	SWIM zinc finger family protein
Gohir.D12G208000	D12	56306087	56310269	AT1G32130	Transcription elongation factor (TFIIS) family protein
Gohir.D12G208100	D12	56313280	56314985	AT1G32170	xyloglucan endotransglucosylase/hydrolase 30
Gohir.D12G208200	D12	56316187	56320881	AT3G03050	cellulose synthase-like D3
Gohir.D12G208300	D12	56330615	56334620	AT1G32190	alpha/beta-Hydrolases superfamily protein
Gohir.D12G208350	D12	56354671	56355091
Gohir.D12G208400	D12	56355926	56357537	AT1G32210	Defender against death (DAD family) protein
Gohir.D12G208500	D12	56357943	56360568
Gohir.D12G208700	D12	56379484	56384870	AT1G32230	WWE protein-protein interaction domain protein family
Gohir.D12G208800	D12	56384959	56389046	AT2G35500	shikimate kinase like 2
Gohir.D12G208900	D12	56398548	56404320	AT1G32240	Homeodomain-like superfamily protein
Gohir.D12G209000	D12	56436301	56444516	AT5G46910	Transcription factor jumonji (jmj) family protein / zinc finger (C5HC2 type) family protein
Gohir.D12G209100	D12	56455475	56456223
Gohir.D12G209150	D12	56456892	56457951	AT1G32250	Calcium-binding EF-hand family protein
Gohir.D12G209200	D12	56457988	56460427	AT4G17720	RNA-binding (RRM/RBD/RNP motifs) family protein
Gohir.D12G209300	D12	56467314	56470766	AT5G46860	Syntaxin/t-SNARE family protein
Gohir.D12G209350	D12	56470904	56478240	AT5G46850
Gohir.D12G209400	D12	56478463	56479830	AT1G32310
Gohir.D12G209500	D12	56480725	56481683	AT1G32320	MAP kinase kinase 10
Gohir.D12G209600	D12	56482356	56487473	AT1G32330	heat shock transcription factor A1D
Gohir.D12G209700	D12	56489714	56493819	AT1G32340	NDR1/HIN1-like 8
Gohir.D12G209800	D12	56512182	56518816	AT4G25960	P-glycoprotein 2
Gohir.D12G209900	D12	56518824	56521682	AT5G46840	RNA-binding (RRM/RBD/RNP motifs) family protein
Gohir.D12G210000	D12	56543095	56549216	AT1G32360	Zinc finger (CCCH-type) family protein
Gohir.D12G210100	D12	56552779	56553714	AT4G17920	RING/U-box superfamily protein
Gohir.D12G210200	D12	56585481	56587675	AT3G23910
Gohir.D12G210300	D12	56591415	56594376	AT5G46690	beta HLH protein 71
Gohir.D12G210400	D12	56604452	56606150	AT3G03550	RING/U-box superfamily protein
Gohir.D12G210500	D12	56622669	56625079	AT4G26260	myo-inositol oxygenase 4
Gohir.D12G210600	D12	56633244	56636313	AT4G17900	PLATZ transcription factor family protein
Gohir.D12G210700	D12	56657096	56661564	AT4G17890	ARF-GAP domain 8
Gohir.D12G210800	D12	56669979	56671919	AT1G32640	Basic helix-loop-helix (bHLH) DNA-binding family protein
Gohir.D12G210900	D12	56673555	56673896	AT5G46770
Gohir.D12G211000	D12	56686008	56687064	AT4G17870	Polyketide cyclase/dehydrase and lipid transport superfamily protein
Gohir.D12G211100	D12	56689242	56692787	AT5G46800	Mitochondrial substrate carrier family protein
Gohir.D12G211200	D12	56693750	56700755	AT3G02890	RING/FYVE/PHD zinc finger superfamily protein
Gohir.D12G211250	D12	56709002	56709767	AT4G17810	C2H2 and C2HC zinc fingers superfamily protein
Gohir.D12G211300	D12	56723387	56724645	AT4G17800	Predicted AT-hook DNA-binding family protein
Gohir.D12G211400	D12	56728087	56729117
Gohir.D12G211500	D12	56731509	56732399	AT2G35290
Gohir.D12G211600	D12	56733371	56737169	AT4G17950	AT hook motif DNA-binding family protein
Gohir.D12G211650	D12	56738819	56739987	AT5G46630	Clathrin adaptor complexes medium subunit family protein
Gohir.D12G211700	D12	56742845	56745291	AT1G32550	2Fe-2S ferredoxin-like superfamily protein
Gohir.D12G211800	D12	56747097	56751260	AT1G32540	lsd one like 1
Gohir.D12G211900	D12	56753143	56756927	AT2G35320	EYES ABSENT homolog
Gohir.D13G237800	D13	64825164	64828103	AT2G28060	5'-AMP-activated protein kinase beta-2 subunit protein

## Sheet: Table S5
Table S5 Candidate genes recoded in Leaf Senescence Database LSD 3.0
Candidate gene	Homologs	Descprits
Gohir.A02G046600	AT5G18650	CHY-type/CTCHY-type/RING-type Zinc finger protein
Gohir.A03G031400	AT2G28060	5'-AMP-activated protein kinase beta-2 subunit protein
Gohir.A03G031700	AT5G04250	Cysteine proteinases superfamily protein
Gohir.A03G033000	AT2G28350	auxin response factor 10
Gohir.A03G033200	AT5G60690	Homeobox-leucine zipper family protein / lipid-binding START domain-containing protein
Gohir.A03G033600	AT5G60680	Protein of unknown function, DUF584
Gohir.A03G034300	AT5G60580	RING/U-box superfamily protein
Gohir.A03G034500	AT2G41060	RNA-binding (RRM/RBD/RNP motifs) family protein
Gohir.A03G034800	AT3G20770	Ethylene insensitive 3 family protein
Gohir.A03G034900	AT3G20770	Ethylene insensitive 3 family protein
Gohir.A03G115900	AT2G02090	SNF2 domain-containing protein / helicase domain-containing protein
Gohir.A06G012300	AT1G19310	RING/U-box superfamily protein
Gohir.A06G012500	AT3G50770	calmodulin-like 41
Gohir.A06G012600	AT1G47510	inositol polyphosphate 5-phosphatase 11
Gohir.A06G013500	AT2G23450	Protein kinase superfamily protein
Gohir.A06G015200	AT5G25900	GA requiring 3
Gohir.A06G016600	AT4G11800	Calcineurin-like metallo-phosphoesterase superfamily protein
Gohir.A06G016650	AT2G26560	phospholipase A 2A
Gohir.A06G016700	AT2G26560	phospholipase A 2A
Gohir.A06G017300	AT1G47380	Protein phosphatase 2C family protein
Gohir.A06G017900	AT1G18210	Calcium-binding EF-hand family protein
Gohir.A06G018101	AT2G43290	Calcium-binding EF-hand family protein
Gohir.A06G018300	AT1G24620	EF hand calcium-binding protein family
Gohir.A06G018633	AT5G42890	sterol carrier protein 2
Gohir.A06G018700	AT5G42900	cold regulated gene 27
Gohir.A06G019600	AT1G45688
Gohir.A06G143500	AT3G14280
Gohir.A06G144000	AT1G54100	aldehyde dehydrogenase 7B4
Gohir.A06G144200	AT1G54115	cation calcium exchanger 4
Gohir.A08G093600	AT5G53420	CCT motif family protein
Gohir.A09G233500	AT4G15610	Uncharacterised protein family (UPF0497)
Gohir.A09G234100	AT5G49480	Ca2+-binding protein 1
Gohir.A09G234600	AT3G06620	PAS domain-containing protein tyrosine kinase family protein
Gohir.A09G234900	AT3G17000	ubiquitin-conjugating enzyme 32
Gohir.A09G234950	AT3G03450	RGA-like 2
Gohir.A09G235000	AT3G16990	Haem oxygenase-like, multi-helical
Gohir.A09G235800	AT3G16857	response regulator 1
Gohir.A09G236500	AT3G16770	ethylene-responsive element binding protein
Gohir.A09G236900	AT3G05610	Plant invertase/pectin methylesterase inhibitor superfamily
Gohir.A09G237000	AT3G05610	Plant invertase/pectin methylesterase inhibitor superfamily
Gohir.A09G237100	AT3G05610	Plant invertase/pectin methylesterase inhibitor superfamily
Gohir.A09G237200	AT3G05610	Plant invertase/pectin methylesterase inhibitor superfamily
Gohir.A09G237300	AT3G05610	Plant invertase/pectin methylesterase inhibitor superfamily
Gohir.A09G237500	AT3G16720	TOXICOS EN LEVADURA 2
Gohir.A09G237700	AT3G06850	2-oxoacid dehydrogenases acyltransferase family protein
Gohir.A09G238900	AT4G02510	translocon at the outer envelope membrane of chloroplasts 159
Gohir.A09G239900	AT1G09070	soybean gene regulated by cold-2
Gohir.A09G240500	AT3G21460	Glutaredoxin family protein
Gohir.A09G240600	AT5G18610	Protein kinase superfamily protein
Gohir.A09G240800	AT3G06590	basic helix-loop-helix (bHLH) DNA-binding superfamily protein
Gohir.A09G241300	AT1G56600	galactinol synthase 2
Gohir.A09G241500	AT5G49620	myb domain protein 78
Gohir.A09G241550	AT4G38930	Ubiquitin fusion degradation UFD1 family protein
Gohir.A09G241600	AT1G02400	gibberellin 2-oxidase 6
Gohir.A09G242900	AT1G13950	eukaryotic elongation factor 5A-1
Gohir.A11G056100	AT5G09760	Plant invertase/pectin methylesterase inhibitor superfamily
Gohir.A11G056200	AT1G77120	alcohol dehydrogenase 1
Gohir.A11G056300	AT1G77120	alcohol dehydrogenase 1
Gohir.A12G268600	AT1G18160	Protein kinase superfamily protein
Gohir.A12G268900	AT1G18210	Calcium-binding EF-hand family protein
Gohir.A12G270400	AT1G18300	nudix hydrolase homolog 4
Gohir.A12G270900	AT1G73500	MAP kinase kinase 9
Gohir.A12G271250	AT3G17790	purple acid phosphatase 17
Gohir.A12G271500	AT1G73220	organic cation/carnitine transporter1
Gohir.A12G271600	AT1G73220	organic cation/carnitine transporter1
Gohir.D06G151700	AT4G05050	ubiquitin 11
Gohir.D07G086300	AT2G42975
Gohir.D07G087400	AT3G22160	VQ motif-containing protein
Gohir.D07G087450	AT1G05300	zinc transporter 5 precursor
Gohir.D07G088100	AT1G62300	WRKY family transcription factor
Gohir.D07G089100	AT3G07820	Pectin lyase-like superfamily protein
Gohir.D07G090001	AT1G05010	ethylene-forming enzyme
Gohir.D07G090100	AT1G05010	ethylene-forming enzyme
Gohir.D10G232700	AT5G13820	telomeric DNA binding protein 1
Gohir.D10G232800	AT2G37650	GRAS family transcription factor
Gohir.D10G233200	AT3G55530	RING/U-box superfamily protein
Gohir.D10G233300	AT2G39710	Eukaryotic aspartyl protease family protein
Gohir.D10G233500	AT3G11430	glycerol-3-phosphate acyltransferase 5
Gohir.D10G233600	AT3G21420	2-oxoglutarate (2OG) and Fe(II)-dependent oxygenase superfamily protein
Gohir.D10G234200	AT3G55560	AT-hook protein of GA feedback 2
Gohir.D10G234600	AT3G11410	protein phosphatase 2CA
Gohir.D10G235400	AT2G39770	Glucose-1-phosphate adenylyltransferase family protein
Gohir.D10G235800	AT3G55610	delta 1-pyrroline-5-carboxylate synthase 2
Gohir.D10G235816	AT1G77450	NAC domain containing protein 32
Gohir.D10G235832	AT1G77450	NAC domain containing protein 32
Gohir.D10G237100	AT2G39840	type one serine/threonine protein phosphatase 4
Gohir.D10G237700	AT1G69490	NAC-like, activated by AP3/PI
Gohir.D10G237708	AT1G12060	BCL-2-associated athanogene 5
Gohir.D10G238356	AT5G02020
Gohir.D10G238372	AT4G37370	cytochrome P450, family 81, subfamily D, polypeptide 8
Gohir.D10G238380	AT4G37370	cytochrome P450, family 81, subfamily D, polypeptide 8
Gohir.D10G238388	AT4G37370	cytochrome P450, family 81, subfamily D, polypeptide 8
Gohir.D10G239000	AT1G22400	UDP-Glycosyltransferase superfamily protein
Gohir.D10G239300	AT1G22400	UDP-Glycosyltransferase superfamily protein
Gohir.D10G239400	AT1G22400	UDP-Glycosyltransferase superfamily protein
Gohir.D10G240200	AT1G07400	HSP20-like chaperones superfamily protein
Gohir.D10G242000	AT5G05830	RING/FYVE/PHD zinc finger superfamily protein
Gohir.D10G242008	AT5G05840	Protein of unknown function (DUF620)
Gohir.D10G242700	AT3G55770	GATA type zinc finger transcription factor family protein
Gohir.D10G243200	AT2G38080	Laccase/Diphenol oxidase family protein
Gohir.D10G244000	AT2G39970	Mitochondrial substrate carrier family protein
Gohir.D10G247200	AT5G52530	dentin sialophosphoprotein-related
Gohir.D10G247400	AT5G05700	arginine-tRNA protein transferase 1
Gohir.D12G097500	AT2G45140	plant VAP homolog 12
Gohir.D12G098300	AT1G02080	transcription regulators
Gohir.D12G098900	AT2G44990	carotenoid cleavage dioxygenase 7
Gohir.D12G099300	AT4G01710	ARP2/3 complex 16 kDa subunit (p16-Arc)
Gohir.D12G102400	AT1G44750	purine permease 11
Gohir.D12G102900	AT5G13800	pheophytinase
Gohir.D12G103400	AT5G13790	AGAMOUS-like 15
Gohir.D12G104800	AT3G60800	DHHC-type zinc finger family protein
Gohir.D12G104900	AT2G02390	glutathione S-transferase zeta 1
Gohir.D12G105700	AT3G61050	Calcium-dependent lipid-binding (CaLB domain) family protein
Gohir.D12G105900	AT2G45660	AGAMOUS-like 20
Gohir.D12G105900	AT2G45660	AGAMOUS-like 20
Gohir.D12G106400	AT2G42010	phospholipase D beta 1
Gohir.D12G106532	AT5G01520	RING/U-box superfamily protein
Gohir.D12G106700	AT4G22990	Major Facilitator Superfamily with SPX (SYG1/Pho81/XPR1) domain-containing protein
Gohir.D12G106900	AT4G23010	UDP-galactose transporter 2
Gohir.D12G107150	AT3G16857	response regulator 1
Gohir.D12G107400	AT3G61060	phloem protein 2-A13
Gohir.D12G108300	AT2G45760	BON association protein 2
Gohir.D12G108400	AT2G45760	BON association protein 2
Gohir.D12G108450	AT5G11510	myb domain protein 3r-4
Gohir.D12G108600	AT4G00550	digalactosyl diacylglycerol deficient 2
Gohir.D12G109500	AT5G24090	chitinase A
Gohir.D12G109950	AT3G12580	heat shock protein 70
Gohir.D12G110100	AT3G61550	RING/U-box superfamily protein
Gohir.D12G110400	AT1G01490	Heavy metal transport/detoxification superfamily protein
Gohir.D12G113300	AT3G61600	POZ/BTB containin G-protein 1
Gohir.D12G113400	AT2G04520	Nucleic acid-binding, OB-fold-like protein
Gohir.D12G113600	AT2G46270	G-box binding factor 3
Gohir.D12G113900	AT2G46310	cytokinin response factor 5
Gohir.D12G116100	AT1G01300	Eukaryotic aspartyl protease family protein
Gohir.D12G117300	AT2G46600	Calcium-binding EF-hand family protein
Gohir.D12G118100	AT2G46680	homeobox 7
Gohir.D12G118300	AT2G46690	SAUR-like auxin-responsive protein family
Gohir.D12G118800	AT5G24090	chitinase A
Gohir.D12G119000	AT4G00870	basic helix-loop-helix (bHLH) DNA-binding superfamily protein
Gohir.D12G203600	AT1G31600	RNA-binding (RRM/RBD/RNP motifs) family protein
Gohir.D12G204500	AT5G45360	F-box family protein
Gohir.D12G204900	AT4G19170	nine-cis-epoxycarotenoid dioxygenase 4
Gohir.D12G206028	AT5G53400	HSP20-like chaperones superfamily protein
Gohir.D12G206500	AT4G19040	ENHANCED DISEASE RESISTANCE 2
Gohir.D12G206600	AT2G15480	UDP-glucosyl transferase 73B5
Gohir.D12G206900	AT2G35550	basic pentacysteine 7
Gohir.D12G207200	AT2G45550	cytochrome P450, family 76, subfamily C, polypeptide 4
Gohir.D12G208000	AT1G32130	Transcription elongation factor (TFIIS) family protein
Gohir.D12G208700	AT1G32230	WWE protein-protein interaction domain protein family
Gohir.D12G209000	AT5G46910	Transcription factor jumonji (jmj) family protein / zinc finger (C5HC2 type) family protein
Gohir.D12G210300	AT5G46690	beta HLH protein 71
Gohir.D12G210600	AT4G17900	PLATZ transcription factor family protein
Gohir.D12G210800	AT1G32640	Basic helix-loop-helix (bHLH) DNA-binding family protein
Gohir.D12G211000	AT4G17870	Polyketide cyclase/dehydrase and lipid transport superfamily protein
Gohir.D12G211500	AT2G35290
Gohir.D13G237800	AT2G28060	5'-AMP-activated protein kinase beta-2 subunit protein

## Sheet: Table S6
Table S6 List of the 355 accessions for GWAS
Ecological region: Yellow River Region (YRR), the Yangzi River Region (YZRR), The Northwest Inland Region (NIR), the Northern Specific Early-Maturity Region (NSER), and the United States (US).
Sample	Accession name	Origin	Ecological region	SAR ID
S1	Zhong2191	Henan	YRR	SRR5663653
S2	Zhong40418	Henan	YRR	SRR5665603
S3	Zhong40618	Henan	YRR	SRR5665624
S4	Zhong40612	Henan	YRR	SRR5666379
S5	Zhong51811	Henan	YRR	SRR5678372
S6	CRI94A1822	Henan	YRR	SRR5678379
S7	Zhong61832	Henan	YRR	SRR5690626
S8	Zhong71239	Henan	YRR	SRR5690628
S9	PB12-1-10	Henan	YRR	SRR5712665
S10	PB12-1-7	Henan	YRR	SRR5712666
S11	PB12-1-8	Henan	YRR	SRR5712668
S12	Zhong1476	Henan	YRR	SRR5712674
S13	Zhong151222	Henan	YRR	SRR5712676
S14	Zhong152201	Henan	YRR	SRR5712677
S15	Zhong152201SQ	Henan	YRR	SRR5712678
S16	Zhong152214	Henan	YRR	SRR5712679
S17	Zhong152224	Henan	YRR	SRR5712704
S18	SS2011	Henan	YRR	SRR5713197
S19	CQ2012-3	Henan	YRR	SRR5713256
S20	CQ2012-4	Henan	YRR	SRR5713307
S21	Zhong29T41	Henan	YRR	SRR5713311
S22	Zhong29T42	Henan	YRR	SRR5713312
S23	L426	Henan	YRR	SRR5713313
S24	K640	Shandong	YRR	SRR5713314
S25	N82	the United States	Amerasian	SRR5713315
S26	P21-6-7	the United States	Amerasian	SRR5713316
S27	Shannong SF06	Shandong	YRR	SRR5713317
S28	sGK16	Beijing	YRR	SRR5713461
S29	V321-20-14	Beijing	YRR	SRR5713462
S30	Baimian 17	Henan	YRR	SRR5713463
S31	Chaoaoyang 1	Azerbaijan	Amerasian	SRR5713465
S32	Deltapine 20	the United States	Amerasian	SRR5713466
S33	De 97-047	the United States	Amerasian	SRR5722989
S34	Guannong 1	Liaoning	NSER	SRR5723027
S35	Han2490	Hebei	YRR	SRR5723063
S36	Han656	Hebei	YRR	SRR5723112
S37	Han559	Hebei	YRR	SRR5723114
S38	Han667	Hebei	YRR	SRR5723117
S39	Han686	Hebei	YRR	SRR5723119
S40	Han9609	Hebei	YRR	SRR5723120
S41	Heishanmian1	Liaoning	NSER	SRR5723122
S42	Jinmian3	Liaoning	NSER	SRR5723124
S43	Jinmian10	Shanxi	YRR	SRR5723125
S44	Jinmian21	Shanxi	YRR	SRR5723127
S45	Jinmian23	Shanxi	YRR	SRR5723128
S46	Jinmian5	Shanxi	YRR	SRR6075042
S47	Liaomian10	Liaoning	NSER	SRR6075043
S48	Liaomian17	Liaoning	NSER	SRR6075045
S49	Liaomian5	Liaoning	NSER	SRR6075047
S50	Liaomian6	Liaoning	NSER	SRR6079356
S51	Liaomian7	Liaoning	NSER	SRR6079359
S52	Liaomian9	Liaoning	NSER	SRR6079366
S53	Liaoyangduanjie	Liaoning	NSER	SRR6079373
S54	Lu154	Shandong	YRR	SRR6079374
S55	Lumianyan19	Shandong	YRR	SRR6079383
S56	Lumian2153	Shandong	YRR	SRR6079384
S57	Nongken5	the North of Xinjiang	NIR	SRR6079387
S58	Shan70	Shanxi	NIR	SRR6079422
S59	Shizao1	Hebei	YRR	SRR6079423
S60	Shizao2	Hebei	YRR	SRR6079426
S61	Shizao3	Hebei	YRR	SRR6079427
S62	X13-7	Henan	YRR	SRR6080235
S63	X25TF	Henan	YRR	SRR6080238
S64	Xiazao1	Hebei	YRR	SRR6080239
S65	Xiazao2	Hebei	YRR	SRR6080240
S66	Xiazao3	Hebei	YRR	SRR6080241
S67	Xinluzao11	the North of Xinjiang	NIR	SRR6080242
S68	Xinluzao36	the North of Xinjiang	NIR	SRR6080243
S69	Xinluzao3	the North of Xinjiang	NIR	SRR6080244
S70	Xinluzao42	the North of Xinjiang	NIR	SRR6080245
S71	Xinluzao45	the North of Xinjiang	NIR	SRR6112428
S72	Xinluzao4	the North of Xinjiang	NIR	SRR6112429
S73	Xinluzao6	the North of Xinjiang	NIR	SRR6112430
S74	Xinluzao8	the North of Xinjiang	NIR	SRR6112435
S75	Xinluzao9	the North of Xinjiang	NIR	SRR6112439
S76	Mianxiang368	Henan	YRR	SRR6112440
S77	Yu1335	Henan	YRR	SRR6112441
S78	Yumian12	Henan	YRR	SRR6112472
S79	Yuzao8E13	Henan	YRR	SRR6112473
S80	Yuzao9110	Henan	YRR	SRR6112474
S81	Jinmian57	Shanxi	YRR	SRR6117358
S82	YunzaoN95	Shanxi	YRR	SRR6117359
S83	Zhong416	Henan	YRR	SRR6117360
S84	Zhong425-5	Henan	YRR	SRR6117376
S85	Zhong716	Henan	YRR	SRR6117377
S86	Zhong213	Henan	YRR	SRR6117378
S87	Zhongchuang 88	Hebei	YRR	SRR6117379
S88	CRI10	Henan	YRR	SRR6117380
S89	CRI14	Henan	YRR	SRR6117381
S90	CRI16	Henan	YRR	SRR6117382
S91	CRI20	Henan	YRR	SRR6117384
S92	CRI24	Henan	YRR	SRR6117385
S93	CRI27	Henan	YRR	SRR6117386
S94	CRI30	Henan	YRR	SRR6117387
S95	CRI36	Henan	YRR	SRR6117389
S96	Han256	Hebei	YRR	SRR6117390
S97	CRI37	Henan	YRR	SRR6117391
S98	CRI42	Henan	YRR	SRR6117392
S99	CRI50	Henan	YRR	SRR6117393
S100	CRI58	Henan	YRR	SRR6117394
S101	CRI64	Henan	YRR	SRR6117395
S102	CRI74	Henan	YRR	SRR6117396
S103	Zhong00776	Henan	YRR	SRR6117461
S104	Zhong20398	Henan	YRR	SRR6117401
S105	Zhong61930	Henan	YRR	SRR6117403
S106	Zhong61995	Henan	YRR	SRR6117404
S107	Zhong102909	Henan	YRR	SRR6117438
S108	Zhong103026	Henan	YRR	SRR6117440
S109	Zhong103028	Henan	YRR	SRR6117442
S110	Zhong103030	Henan	YRR	SRR6117443
S111	Zhong103032	Henan	YRR	SRR6117444
S112	Zhong103075	Henan	YRR	SRR6117445
S113	Zhong103164	Henan	YRR	SRR6117446
S114	Zhong103425	Henan	YRR	SRR6117448
S115	Zhong103297	Henan	YRR	SRR6117451
S116	Zhong109056	Henan	YRR	SRR6117453
S117	CPB12-1-7	Henan	YRR	SRR6117455
S118	CPB12-1-9	Henan	YRR	SRR6117456
S119	CPB12-2-7	Henan	YRR	SRR6117458
S120	298	the North of Xinjiang	NIR	SRR6117459
S121	Zhong602186	Henan	YRR	SRR6122540
S122	CG3020-1	the United States	Amerasian	SRR6122541
S123	CG3020-3	the United States	Amerasian	SRR6122542
S124	FM1735	the United States	Amerasian	SRR6122543
S125	G2005	Henan	YRR	SRR6122544
S126	Zhongzhimian2	Beijing	YRR	SRR6122545
S127	H109	Henan	YRR	SRR6122546
S128	H559	Henan	YRR	SRR6122547
S129	LIH33	Henan	YRR	SRR6122548
S130	Phy-7	the United States	Amerasian	SRR6122549
S131	STS458	the United States	Amerasian	SRR6122550
S132	TM-1	the United States	Amerasian	SRR6122551
S133	Aoshimian 6	Beijing	YRR	SRR6122552
S134	Baimian985	Henan	YRR	SRR6161723
S135	Cang198	Hebei	YRR	SRR6161724
S136	CBB	Henan	YRR	SRR6161725
S137	CNB	Henan	YRR	SRR6161726
S138	Deltapine14	the United States	Amerasian	SRR6161727
S139	Deltapine15	the United States	Amerasian	SRR6161728
S140	Fanmian3	Henan	YRR	SRR6161729
S141	Ganzao109	Jiangxi	YZRR	SRR6161730
S142	Guoxinmian11	Hebei	YRR	SRR6161731
S143	Han7860	Hebei	YRR	SRR6161733
S144	Ji4025	Hebei	YRR	SRR6161734
S145	Jimian 26	Shanxi	YRR	SRR6161735
S146	BM03	Henan	YRR	SRR6161736
S147	Kelin098	Henan	YRR	SRR6161737
S148	Liaomian23	Liaoning	NSER	SRR6161738
S149	Liaomian27	Liaoning	NSER	SRR6161790
S150	Liaomian28	Liaoning	NSER	SRR6161791
S151	Lu05R59	Shandong	YRR	SRR6164732
S152	Lu7619	Shandong	YRR	SRR6164733
S153	Lumianyan17	Shandong	YRR	SRR6164734
S154	Lumianyan21	Shandong	YRR	SRR6164735
S155	Lumianyan28	Shandong	YRR	SRR6164795
S156	Lumianyan36	Shandong	YRR	SRR6164796
S157	Lumianyan38	Shandong	YRR	SRR6165238
S158	Miaobao21	Shandong	YRR	SRR6165239
S159	Renhe39	Shandong	YRR	SRR6165240
S160	Rihuimian6	Anhui	YZRR	SRR6165241
S161	ShannongSF01	Shandong	YRR	SRR6165242
S162	Shan79	Shanxi	NIR	SRR6165243
S163	Stoneville 2B	the United States	Amerasian	SRR6165260
S164	Xinmian 33B	the United States	Amerasian	SRR6165261
S165	Xinzhimian5	Henan	YRR	SRR6173347
S166	Yinhuashu	Shandong	YRR	SRR6173943
S167	You009	Henan	YRR	SRR6173944
S168	Zhong109	Henan	YRR	SRR6173945
S169	CRI17	Henan	YRR	SRR6173946
S170	CRI19	Henan	YRR	SRR6174441
S171	CRI43	Henan	YRR	SRR6174442
S172	CRI60	Henan	YRR	SRR6174443
S173	Zhong662	Henan	YRR	SRR6174444
S174	Zhong679	the North of Xinjiang	NIR	SRR6174445
S175	Zhong69	Henan	YRR	SRR6174446
S176	Zhong800319	Shandong	YRR	SRR6174447
S177	CRI 94A915	Henan	YRR	SRR6174448
S178	CRI12	Henan	YRR	SRR6174455
S179	CRI35	Henan	YRR	SRR6174456
S180	CRI41	Henan	YRR	SRR6174457
S181	CRI45	Henan	YRR	SRR6174458
S182	CRI49	Henan	YRR	SRR6174459
S183	CRI7	Henan	YRR	SRR6174460
S184	Zhongzhimian 8	Beijing	YRR	SRR6174461
S185	Zhongzhimian GD89	Beijing	YRR	SRR6174462
S186	Shan920346	Shanxi	NIR	SRR6174463
S187	XianⅢ9704	the United States	Amerasian	SRR6174464
S188	US-1	the United States	Amerasian	SRR6174465
S189	Kyrgyzstan cotton	Kyrgyzstan	Amerasian	SRR6174466
S190	Bazhou5409	the North of Xinjiang	NIR	SRR6174467
S191	Yumian1	Sichuan	YZRR	SRR6174468
S192	Huazhong910102	Hubei	YZRR	SRR6174469
S193	Israel cotton	Israel	Amerasian	SRR6174470
S194	Ken6614	the North of Xinjiang	NIR	SRR6174471
S195	Ken0074	the North of Xinjiang	NIR	SRR6174472
S196	Chuan239-1	Sichuan	YZRR	SRR6174473
S197	Bamian3	Sichuan	YZRR	SRR6174474
S198	Chuan338	Sichuan	YZRR	SRR6174595
S199	Chuan267	Sichuan	YZRR	SRR6174596
S200	Chuan65	Sichuan	YZRR	SRR6174597
S201	Chuanjian1	Sichuan	YZRR	SRR6174598
S202	Xinluzao 2	the North of Xinjiang	NIR	SRR6174599
S203	Xinluzao10	the North of Xinjiang	NIR	SRR6174600
S204	Xinluzao12	the North of Xinjiang	NIR	SRR6174601
S205	Xinluzao13	the North of Xinjiang	NIR	SRR6174602
S206	Xinluzao15	the North of Xinjiang	NIR	SRR6174603
S207	Xinluzao16	the North of Xinjiang	NIR	SRR6174604
S208	Xinluzao17	the North of Xinjiang	NIR	SRR6174605
S209	Xinluzao18	the North of Xinjiang	NIR	SRR6174606
S210	Xinluzao19	the North of Xinjiang	NIR	SRR6174667
S211	Xinluzao20	the North of Xinjiang	NIR	SRR6174668
S212	Xinluzao21	the North of Xinjiang	NIR	SRR6174669
S213	Xinluzao22	the North of Xinjiang	NIR	SRR6174670
S214	Xinluzao23	the North of Xinjiang	NIR	SRR6174671
S215	Xinluzao24	the North of Xinjiang	NIR	SRR6174672
S216	Yumian5	Henan	YRR	SRR6174673
S217	Yumian18	Henan	YRR	SRR6174674
S218	Yumian21	Henan	YRR	SRR6174675
S219	Yun1729	Shanxi	YRR	SRR6174676
S220	Zhemian11	Zhejiang	YZRR	SRR6174677
S221	Tkuo	the North of Xinjiang	NIR	SRR6174678
S222	Bo425	the North of Xinjiang	NIR	SRR6174679
S223	Xinluzhong 60	the South of Xinjiang	NIR	SRR6174680
S224	Ken27-3	the North of Xinjiang	NIR	SRR6174681
S225	B-3	the South of Xinjiang	NIR	SRR6174682
S226	Xinluzao25	the North of Xinjiang	NIR	SRR6174683
S227	Xinluzao26	the South of Xinjiang	NIR	SRR6174684
S228	Xinluzao27	the North of Xinjiang	NIR	SRR6174685
S229	Xinluzao28	the North of Xinjiang	NIR	SRR6174686
S230	Xinluzao29	the North of Xinjiang	NIR	SRR6174687
S231	Xinluzao30	the North of Xinjiang	NIR	SRR6174688
S232	Xinluzao32	the North of Xinjiang	NIR	SRR6174690
S233	Xinluzao33	the North of Xinjiang	NIR	SRR6174689
S234	Xinluzao34	the North of Xinjiang	NIR	SRR6174691
S235	Xinluzao35	the North of Xinjiang	NIR	SRR6174692
S236	Xinluzao37	the North of Xinjiang	NIR	SRR6174693
S237	Xinluzao38	the North of Xinjiang	NIR	SRR6174694
S238	Xinluzao39	the North of Xinjiang	NIR	SRR6174695
S239	Xinluzao40	the North of Xinjiang	NIR	SRR6174696
S240	Xinluzao41	the South of Xinjiang	NIR	SRR6174697
S241	Xinluzao46	the North of Xinjiang	NIR	SRR6517995
S242	Xinluzao47	the North of Xinjiang	NIR	SRR6517996
S243	Xinluzao48	the North of Xinjiang	NIR	SRR6517997
S244	Xinluzao49	the North of Xinjiang	NIR	SRR6517998
S245	Xinluzao50	the North of Xinjiang	NIR	SRR6518002
S246	Xinluzao51	the North of Xinjiang	NIR	SRR6518003
S247	Xinluzhong1	the South of Xinjiang	NIR	SRR6518284
S248	Xinluzhong3	the South of Xinjiang	NIR	SRR6518285
S249	Xinluzhong4	the North of Xinjiang	NIR	SRR6518286
S250	Xinluzhong5	the North of Xinjiang	NIR	SRR6518288
S251	Xinluzhong6	the South of Xinjiang	NIR	SRR6518290
S252	Xinluzhong7	the South of Xinjiang	NIR	SRR6518297
S253	Xinluzhong8	the South of Xinjiang	NIR	SRR6518298
S254	Xinluzhong9	the South of Xinjiang	NIR	SRR6518300
S255	Xinluzhong10	the South of Xinjiang	NIR	SRR6518348
S256	Xinluzhong12	the South of Xinjiang	NIR	SRR6518349
S257	Xinluzhong13	the South of Xinjiang	NIR	SRR6518350
S258	Xinluzhong14	the South of Xinjiang	NIR	SRR6518352
S259	Xinluzhong15	the South of Xinjiang	NIR	SRR6518371
S260	Xinluzhong16	the South of Xinjiang	NIR	SRR6518372
S261	Xinluzhong17	the South of Xinjiang	NIR	SRR6518391
S262	Xinluzhong19	the South of Xinjiang	NIR	SRR6518392
S263	Xinluzhong20	the North of Xinjiang	NIR	SRR6518393
S264	Xinluzhong21	the South of Xinjiang	NIR	SRR6518394
S265	Xinluzhong22	the South of Xinjiang	NIR	SRR6518395
S266	Xinluzhong26	the South of Xinjiang	NIR	SRR6518396
S267	Xinluzhong27	the South of Xinjiang	NIR	SRR6518397
S268	Xinluzhong28	the South of Xinjiang	NIR	SRR6518398
S269	Xinluzhong30	the South of Xinjiang	NIR	SRR6518399
S270	Xinluzhong32	the South of Xinjiang	NIR	SRR6518400
S271	Xinluzhong34	the South of Xinjiang	NIR	SRR6518405
S272	Xinluzhong35	the South of Xinjiang	NIR	SRR6518406
S273	Xinluzhong40	the South of Xinjiang	NIR	SRR6518407
S274	Xinluzhong41	the South of Xinjiang	NIR	SRR6518410
S275	Xinluzhong45	the South of Xinjiang	NIR	SRR6518412
S276	Xinluzhong46	the South of Xinjiang	NIR	SRR6518415
S277	Xinluzhong47	the South of Xinjiang	NIR	SRR6518416
S278	Kangcaoganlin	the United States	Amerasian	SRR6518417
S279	Jiangyin1	Yangtze River	YZRR	SRR6518420
S280	Huihe36	the South of Xinjiang	NIR	SRR6518421
S281	Jinken1042	the North of Xinjiang	NIR	SRR6518422
S282	Guoxinmian9	Hebei	YRR	SRR6518423
S283	Junmian1	the South of Xinjiang	NIR	SRR6518424
S284	Huiyuan717	the North of Xinjiang	NIR	SRR6518425
S285	Yunzao219	Shanxi	YRR	SRR6518426
S286	Yunzao33-356	Shanxi	YRR	SRR6518427
S287	Jinmian2	Liaoning	NSER	SRR6518428
S288	Chaoyangmian2	Liaoning	NSER	SRR6518429
S289	Dunhuang77-116	Gansu	NIR	SRR6518430
S290	Ganmian4	Gansu	NIR	SRR6518444
S291	Guannongzao C-50	Liaoning	NSER	SRR6518445
S292	Guannongchangzao B14	Liaoning	NSER	SRR6518446
S293	Yanzao1	Jiangsu	YZRR	SRR6518447
S294	Yanzao2	Jiangsu	YZRR	SRR6518448
S295	Jinmian6	Liaoning	NSER	SRR6518449
S296	Jinken69-2	the North of Xinjiang	NIR	SRR6518450
S297	Jinken148-39	the North of Xinjiang	NIR	SRR6518451
S298	Zhuangjiahan102	the North of Xinjiang	NIR	SRR6518452
S299	Yinshan4	Henan	YRR	SRR6518453
S300	Ejing1	Hebei	YRR	SRR6518454
S301	Simian3	Sichuan	YZRR	SRR6518455
S302	Stoneville 4B	the United States	Amerasian	SRR6519349
S303	Jimian10	Hebei	YRR	SRR6519350
S304	Jimian11	Hebei	YRR	SRR6519214
S305	Jimian12	Hebei	YRR	SRR6519215
S306	Jimian16	Hubei	YZRR	SRR6519216
S307	Jimian17	Hubei	YZRR	SRR6519217
S308	Sumian4	Jiangsu	YZRR	SRR6519221
S309	Ekangmian2	Hebei	YRR	SRR6519421
S310	Ekangmian3	Hubei	YZRR	SRR6519422
S311	Ekangmian6	Hubei	YZRR	SRR6519423
S312	Edaimian	Hebei	YRR	SRR6519424
S313	Xuzhou142	Jiangsu	YZRR	SRR6519222
S314	Sumian9	Jiangsu	YZRR	SRR6519223
S315	Sumian12	Jiangsu	YZRR	SRR6519224
S316	Sukang191	Jiangsu	YZRR	SRR6519225
S317	Gangmian1	Hebei	YRR	SRR6519226
S318	Gangmian2	Hebei	YRR	SRR6519227
S319	Coker 201	the United States	Amerasian	SRR6519228
S320	Daihongdai	Hunan	YZRR	SRR6519229
S321	Yishuhong	Hubei	YZRR	SRR6519230
S322	Bomian1	Shandong	YRR	SRR6519231
S323	Kemian4	Jiangsu	YZRR	SRR6519232
S324	Ganmian11	Jiangxi	YZRR	SRR6519233
S325	Ganmian12	Jiangxi	YZRR	SRR6519234
S326	Xianmian13	Hunan	YZRR	SRR6519235
S327	Yapengmian	Hubei	YZRR	SRR6519236
S328	Jijiaodezimian	Jiangsu	YZRR	SRR6519237
S329	611bo	Tajikistan	Amerasian	SRR6519238
S330	Annong121	Anhui	YZRR	SRR6519239
S331	Deltapine16	the United States	Amerasian	SRR6519240
S332	Delfos 531	the United States	Amerasian	SRR6519241
S333	Dunmian1	Gansu	NIR	SRR6519242
S334	Dunmian2	Gansu	NIR	SRR6519243
S335	Ganmian2	Jiangxi	YZRR	SRR6519244
S336	Ganmina3	Jiangxi	YZRR	SRR6519245
S337	Ganmian47	Jiangxi	YZRR	SRR6519246
S338	Guangyedaizimina	the United States	Amerasian	SRR6519247
S339	Ji668	Hebei	YRR	SRR6519248
S340	Jimian25	Hebei	YRR	SRR6519249
S341	Jinmian5	Liaoning	NSER	SRR6519250
S342	Keke1543	Uzbekistan	Amerasian	SRR6519251
S343	Ningmian1	Jiangsu	YZRR	SRR6519252
S344	Ningmian22	Jiangsu	YZRR	SRR6519265
S345	Nongda94-7	Hebei	YRR	SRR6519266
S346	Nongdamian8	Hebei	YRR	SRR6519267
S347	Shumian1	Sichuan	YZRR	SRR6519268
S348	Sumian1	Jiangsu	YZRR	SRR6519341
S349	Sumian22	Jiangsu	YZRR	SRR6519342
S350	Xiangmian10	Hunan	YZRR	SRR6519343
S351	Xuzhou219	Jiangsu	YZRR	SRR6519344
S352	Yinshan8	Henan	YRR	SRR6519345
S353	Yumian1	Henan	YRR	SRR6519346
S354	Yumian2	Henan	YRR	SRR6519347
S355	Xinluzao53	the North of Xinjiang	NIR	SRR6519348

## Sheet: Table S7
Table S7 List of paired primers used in this study
Paired primers	Sequences (5 '-> 3')
GhMKK9_cds-F	ATGGCCGTAGTTCGTGAACG
GhMKK9_cds-R	TCAGTTGTCTGCGGACGC
GhMKK9_cdsNC-F	agtggtctctgtccagtcctATGGCCGTAGTTCGTGA
GhMKK9_cdsNC-R	ggtctcagcagaccacaagtTCAGTTGTCTGCGGACG
GhMKK9-qF	AAAGTAGTGTACGGCGACGGTG
GhMKK9-qR	GCCGGAAGGTTTCTCGTACGTT
GhMKK9-TRV2-F	agtggtctctgtccagtcctCGCCAGCTTAATCTCCGTCT
GhMKK9-TRV2-R	ggtctcagcagaccacaagtTATCTAAAGTGCCGGCGTCC
GhHis3-qF	ACACCAACCTTTGCGCGATCCA
GhHis3-qR	CTAAGCGACTGATCCACACTTCTGG
AtSAG12-qF	CAGCTGCGGATGTTGTTG
AtSAG12-qR	CCACTTTCTCCCCATTTTG
AtCAT2-qF	TGGGGCCTTCCTTTTAAGTTAT
AtCAT2-qR	CTCCAGAATGTCCAAAAGTGTG
AtUBQ10-qF	GGCCTTGTATAATCCCTGATGAATAAG
AtUBQ10-qR	AAAGAGATAACAGGAACGGAAACATAGT
